# Supplementary material for: Mini-dCas13X–mediated RNA editing restores dystrophin expression in a humanized mouse model of Duchenne muscular dystrophy
Source: PubMed Central journal article supplement (PMC9888377; doi:10.1172/jci162809), 2023-02-01
Supplement: jci-133-162809-s211.pdf [file jci-133-162809-s211.pdf]

1136 Supplementary materials for  
1137 **Mini-dCas13X-mediated RNA editing restores dystrophin expression in a**  
1138 **humanized mouse model of Duchenne muscular dystrophy**  
1139 Guoling Li<sup>1,2†</sup>, Ming Jin<sup>5†</sup>, Zhifang Li<sup>3,6†</sup>, Qingquan Xiao<sup>2†</sup>, Jiajia Lin<sup>5†</sup>, Dong  
1140 Yang<sup>1,2†</sup>, Yuanhua Liu<sup>2</sup>, Xing Wang<sup>1</sup>, Long Xie<sup>6</sup>, Wenqin Ying<sup>2</sup>, Haoqiang  
1141 Wang<sup>1</sup>, Erwei Zuo<sup>6</sup>, Linyu Shi<sup>1</sup>, Ning Wang<sup>5\*</sup>, Wanjin Chen<sup>5\*</sup>, Chunlong Xu<sup>3,4\*</sup>,  
1142 Hui Yang<sup>1,2,4\*</sup>

1143

1144 †**These authors contributed equally to this work.**

1145 \***Corresponding author Email:**

1146 ningwang@fjmu.edu.cn(N.W.), wanjinchen75@fjmu.edu.cn(W.C.),

1147 xucl@lglab.ac.cn(C.X.), huiyang@huidagene.com(H.Y.)

1148

1149 **This PDF file includes:**

1150 Figure S1. In vitro studies of c.4174C>T mutation correction using the mxABE  
1151 system.

1152 Figure S2. Construction of 10 mxABE expression cassettes.

1153 Figure S3. Representative Sanger sequencing trace of reporter transcripts.

1154 Figure S4. Evaluation of SNV counts by transcriptome-wide off-target analysis  
1155 *in vitro*.

1156 Figure S5. Manhattan plots of transcriptome-wide off-target RNA editing  
1157 analysis for different mxABE constructs.

1158 Figure S6. mxABE-mediated A to I correction of other mutations in the *DMD*  
1159 gene.

1160 Figure S7. *In vivo DMD* gene editing by IM injection with mxABEs after 3  
1161 weeks.

1162 Figure S8. Rescue of dystrophin expression following IM injection of mxABEs  
1163 in *DMD*<sup>E30mut</sup> mice.

1164 Figure S9. *In vivo DMD* gene editing by IM injection with mxABEs after 6  
1165 weeks.

1166 Figure S10. Intramuscular AAV9 delivery of gene editing components rescues  
1167 dystrophin expression.

1168 Figure S11. Calculation of SNV counts by transcriptome-wide off-target  
1169 analysis *in vivo*.

1170 Figure S12. Manhattan plots of transcriptome-wide off-target RNA editing  
1171 analysis *in vivo*.

1172 Figure S13. Gene editing 3 weeks after systemic delivery of mxABEs in  
1173 *DMD*<sup>E30mut</sup> mice.

1174 Figure S14. AAV9-mxABE expression and dystrophin protein level after  
1175 systemic delivery in *DMD*<sup>E30mut</sup> mice.

1176 Figure S15. Histological analysis of dystrophin expression 3 weeks after  
1177 systemic delivery of AAV9-mxABE in *DMD*<sup>E30mut</sup> mice.

1178 Figure S16. Histological analysis 3 weeks after systemic delivery of  
1179 AAV9-mxABE.

1180 Figure S17. Base editing efficiency achieved by systemic delivery of mxABE  
1181 after 6 weeks.  
1182 Figure S18. mxABE expression and dystrophin restoration level 6 weeks after  
1183 systemic administration of AAV9-mxABE.  
1184 Figure S19. Immunostaining of dystrophin in heart, TA, and DI tissues 6 weeks  
1185 after systemic administration of AAV-mxABE.  
1186 Figure S20. Immunostaining of dystrophin in heart, TA ,and DI 6 months after  
1187 systemic administration of AAV-mxABE.  
1188 Figure S21. Collagen staining shows no obvious fibrosis in hearts of treated or  
1189 untreated DMD<sup>E30mut</sup> mice 6 months after systemic administration of  
1190 AAV-mxABE.  
1191 Figure S22. Host immune response to AAV-mxABE treatment indicates no  
1192 overt toxicity after 6 months.  
1193 Figure S23. Systemic delivery of AAV-mxABE rescues dystrophin deficiency in  
1194 adult DMD<sup>E30mut</sup> mice.  
1195 Figure S24. Immunostaining of dystrophin in adult DMD<sup>E30mut</sup> mice 6 weeks  
1196 after systemic injection of AAV-mxABE.  
1197 Tables S1. Target sgRNA and primer sequences.  
1198 Supplemental Sequences  
1199  
1200  
1201  
1202  
1203  
1204  
1205  
1206  
1207  
1208  
1209  
1210  
1211  
1212  
1213  
1214  
1215  
1216  
1217  
1218  
1219  
1220  
1221  
1222  
1223

Figure S1

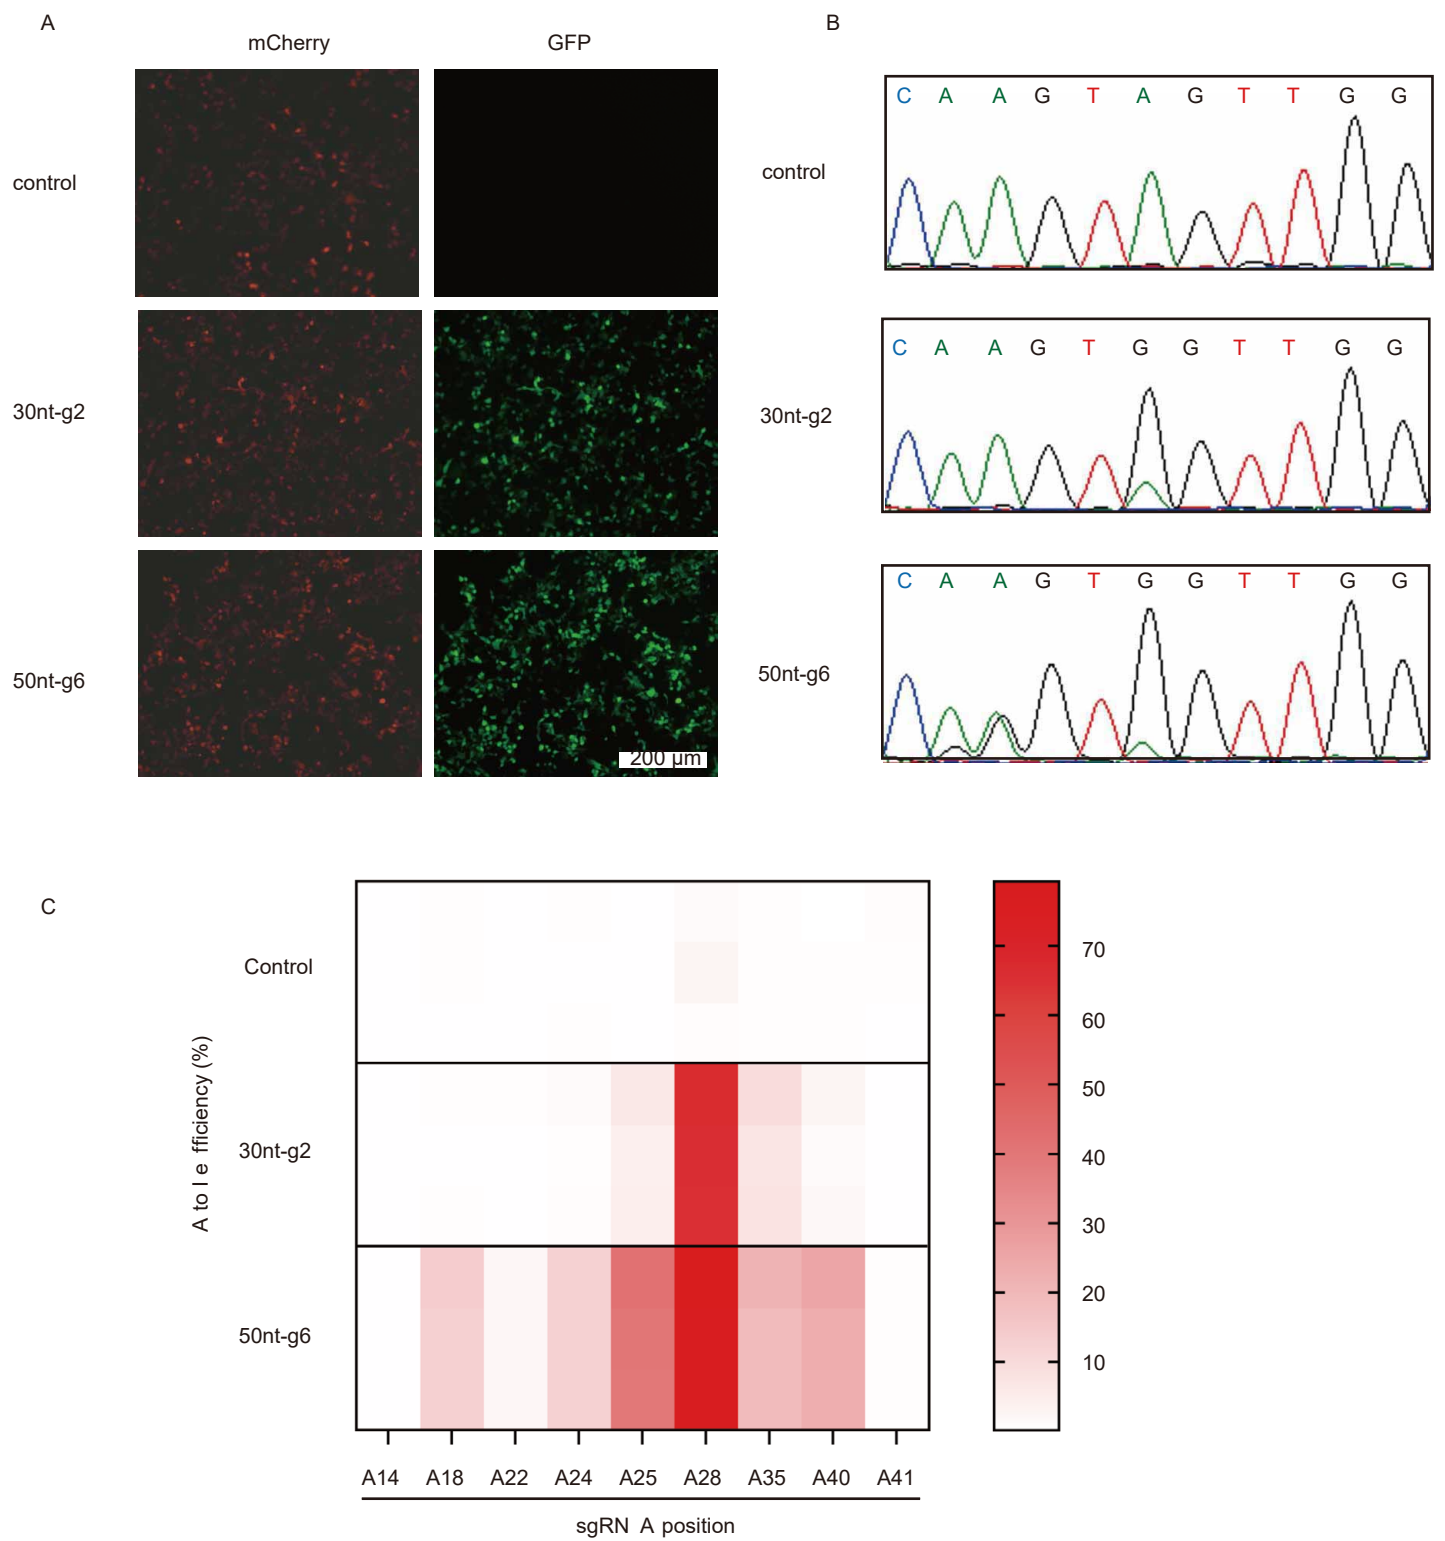

1224 **SUPPLEMENTAL FIGURES**

1225  
1226 **Figure S1. *In vitro* studies of c.4174C>T mutation correction using**  
1227 **mxABE constructs.**

1228 A. Fluorescence microscopy images of HEK293T cells transfected with  
1229 reporter alone, or reporter and mxABE constructs. Scale bar, 200  $\mu$ m. B.  
1230 Representative Sanger sequencing trace of reporter transcripts. C.  
1231 Measurements of the representative gRNA (30 nt-g2 and 50 nt-g6) effect on  
1232 bystander A to I editing efficiency (n=3).

1233  
1234  
1235  
1236  
1237  
1238  
1239  
1240  
1241  
1242  
1243  
1244  
1245  
1246  
1247  
1248  
1249  
1250  
1251  
1252  
1253  
1254  
1255  
1256  
1257  
1258  
1259  
1260  
1261  
1262  
1263  
1264  
1265  
1266  
1267

Figure S2

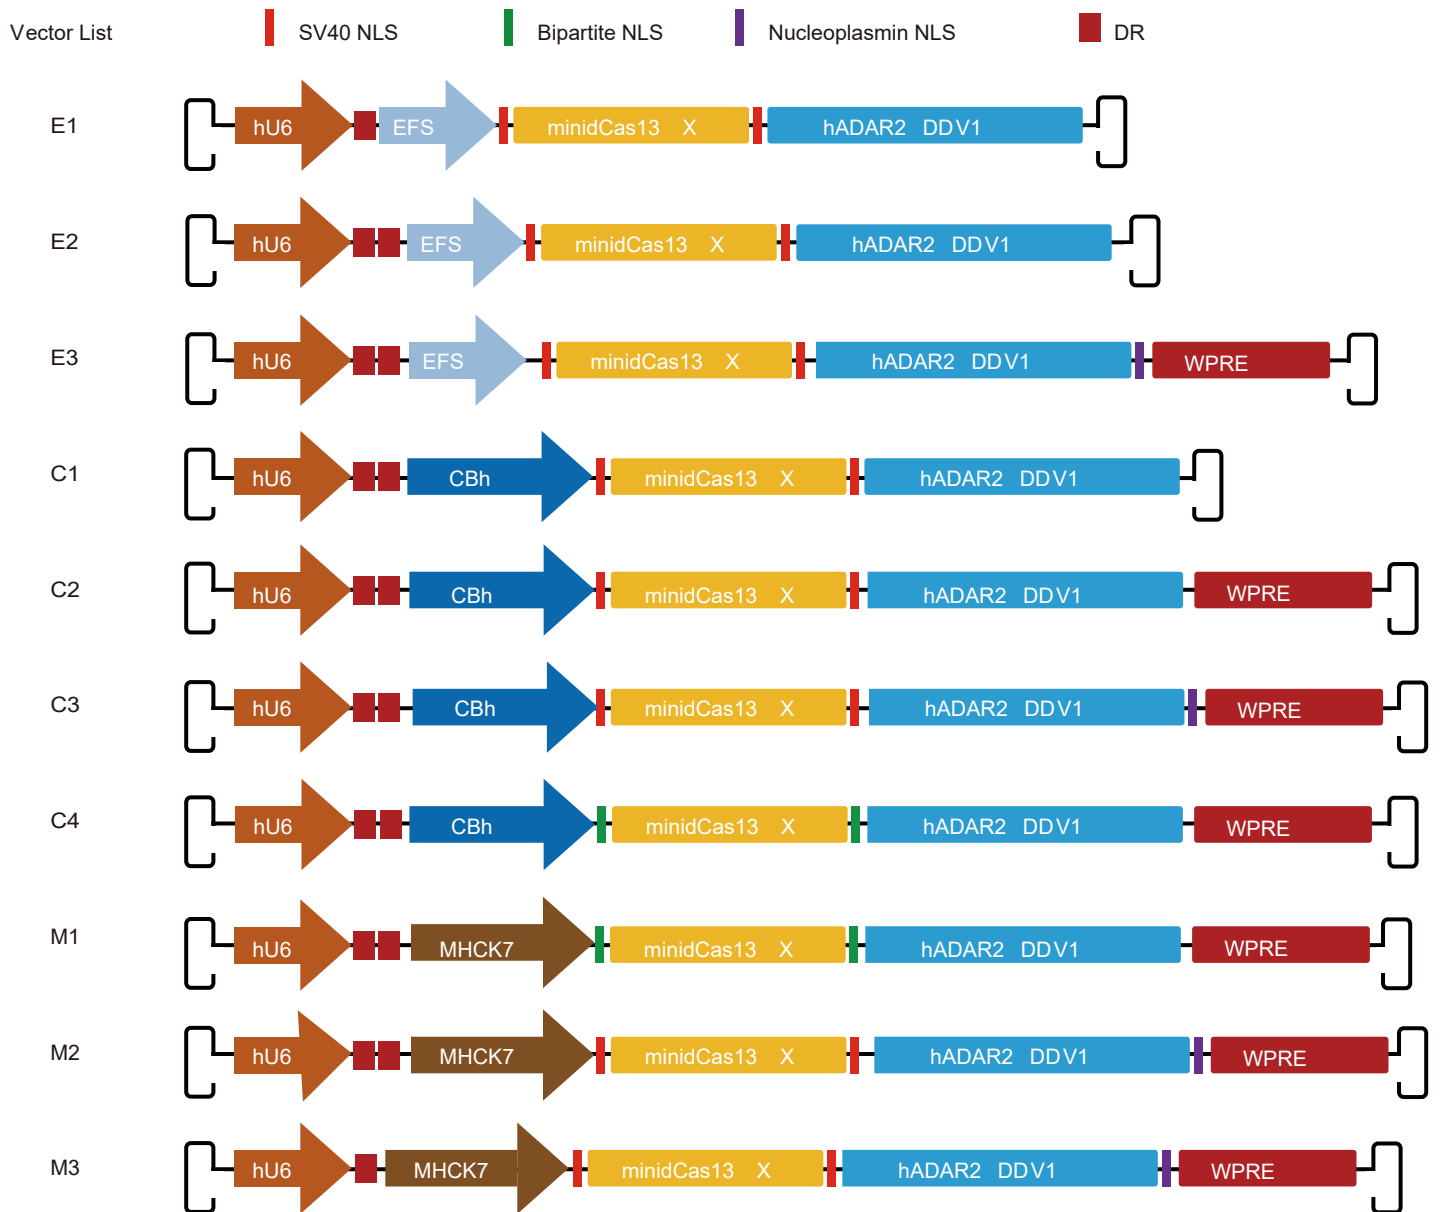

1268 **Figure S2. Construction of 10 mxABE expression cassettes.**

1269 The mxABE expression cassettes contained different promoters (EFS, CBh,  
1270 MHCK7), direct repeat (DR) numbers (single, dual DR), nuclear localization  
1271 signals (NLS), and were constructed with or without a translational regulatory  
1272 element (WPRE).

1273

1274

1275

1276

1277

1278

1279

1280

1281

1282

1283

1284

1285

1286

1287

1288

1289

1290

1291

1292

1293

1294

1295

1296

1297

1298

1299

1300

1301

1302

1303

1304

1305

1306

1307

1308

1309

1310

1311

Figure S3

A

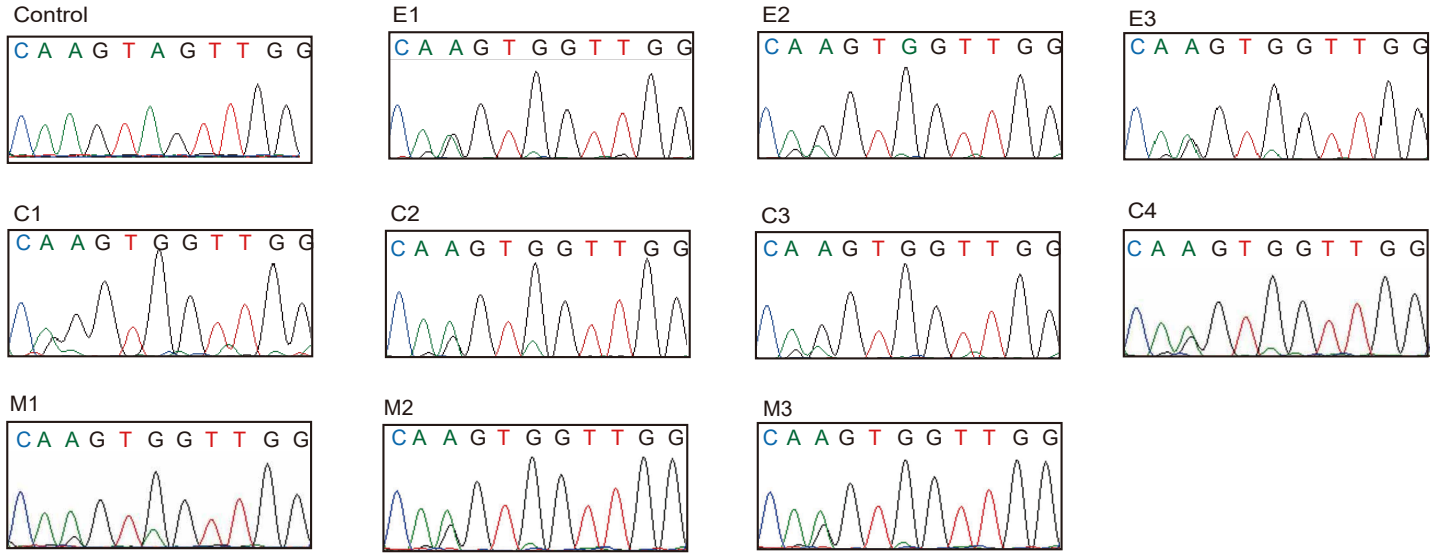

B

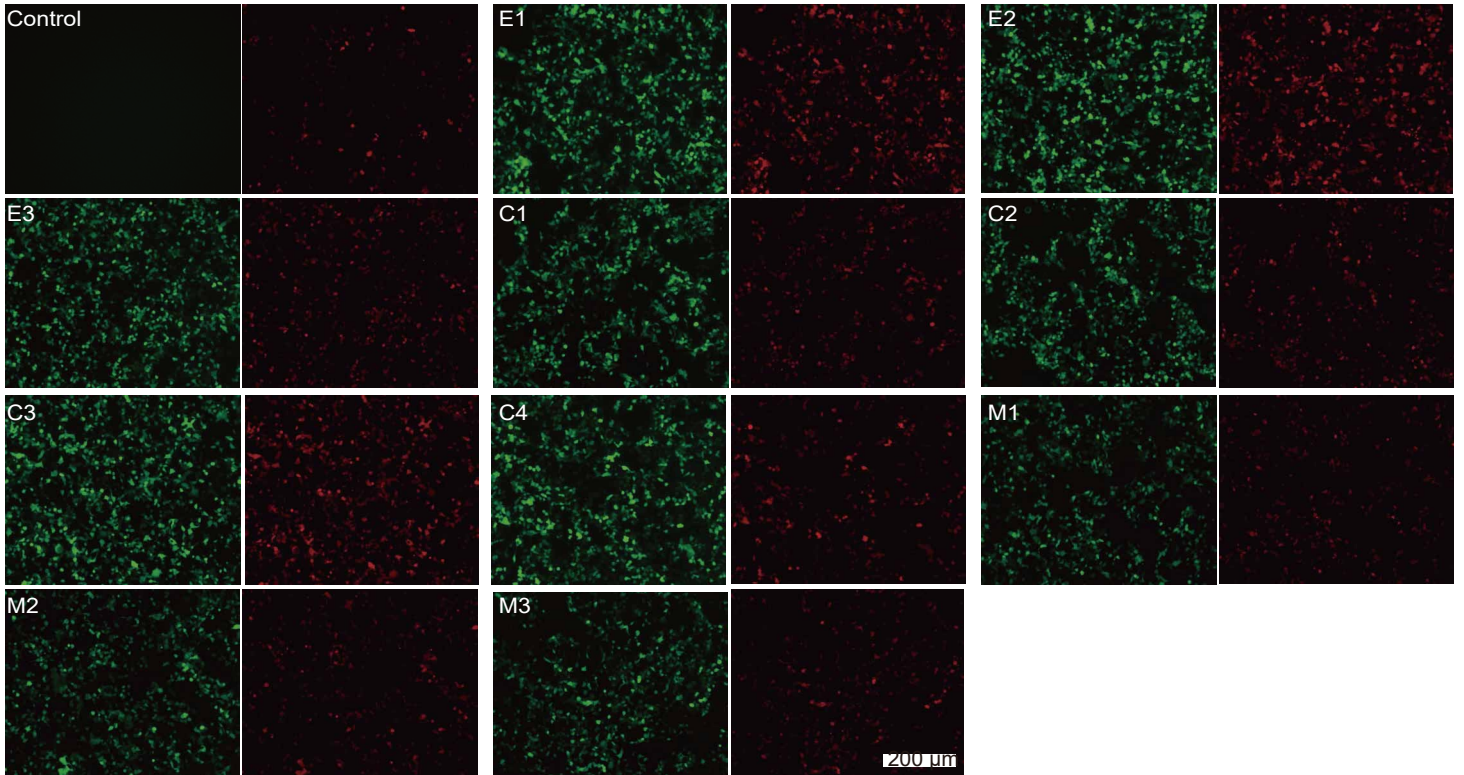

**Figure S3. Representative Sanger sequencing trace of reporter transcripts.**

A. Sanger sequencing results showing representative A to I conversion on reporter transcripts by different mxABE editors. B. Fluorescence microscopy images of HEK293T cells transfected with reporter alone or with reporter and mxABE construct. Scale bar, 200  $\mu$ m. Figure S3B and S1A showed similar results but from different experiments investigating the effect of gRNA length and construct expression elements on mutation correction efficiency respectively.

1312  
1313  
1314  
1315  
1316  
1317  
1318  
1319  
1320  
1321  
1322  
1323  
1324  
1325  
1326  
1327  
1328  
1329  
1330  
1331  
1332  
1333  
1334  
1335  
1336  
1337  
1338  
1339  
1340  
1341  
1342  
1343  
1344  
1345  
1346  
1347  
1348  
1349  
1350  
1351  
1352  
1353  
1354  
1355



Figure S4

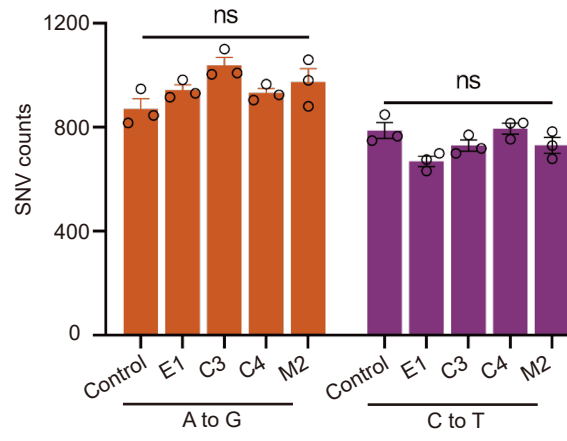

1356 **Figure S4. Evaluation of SNV counts *in vitro* using transcriptome-wide**  
1357 **off-target analysis.**

1358 The transcriptome-wide off-target effect of different mxABE constructs  
1359 targeting the DMD c.4174C>T mutation were performed *in vitro*. The E1  
1360 mxABE construct was driven by an EFS promoter; C3 and C4 were driven by  
1361 an CBh promoter; and M2 was driven by an MHCK7 promoter. Non-targeting  
1362 mxABE construct was analyzed as a control. Values are shown as mean  $\pm$   
1363 SEM (n=3). NS, not statistically significant in multiple comparison test using  
1364 ANOVA (P< 0.01).

1365  
1366  
1367  
1368  
1369  
1370  
1371  
1372  
1373  
1374  
1375  
1376  
1377  
1378  
1379  
1380  
1381  
1382  
1383  
1384  
1385  
1386  
1387  
1388  
1389  
1390  
1391  
1392  
1393  
1394  
1395  
1396  
1397  
1398  
1399

Figure S5

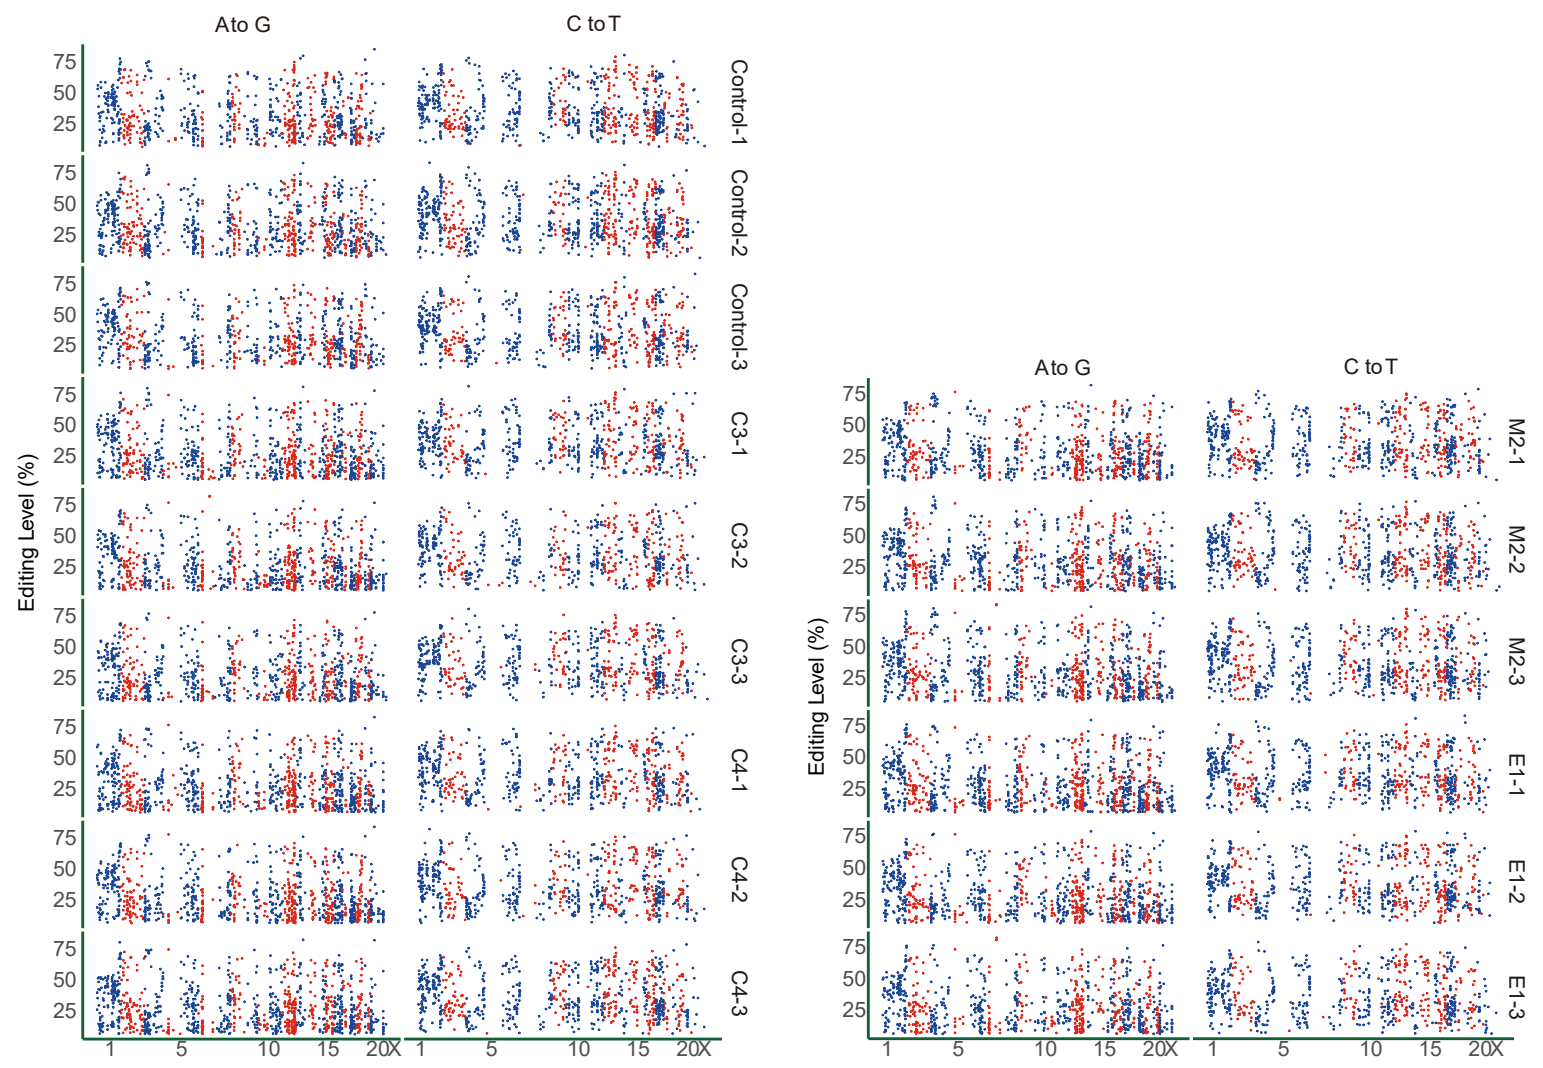

**Figure S5. Manhattan plots of transcriptome-wide off-target RNA editing analysis for different mxABE constructs.**

Non-targeting mxABE construct (control) and E1, C3, C4, and M2 constructs were transfected into HEK293T cells. mCherry-positive cells were sorted and endogenous transcripts were analyzed by deep sequencing. The x and y axes are proportionally enlarged with each Manhattan plot to make the axis legend clear (n=3).

1400  
1401  
1402  
1403  
1404  
1405  
1406  
1407  
1408  
1409  
1410  
1411  
1412  
1413  
1414  
1415  
1416  
1417  
1418  
1419  
1420  
1421  
1422  
1423  
1424  
1425  
1426  
1427  
1428  
1429  
1430  
1431  
1432  
1433  
1434  
1435  
1436  
1437  
1438  
1439  
1440  
1441  
1442  
1443

Figure S6

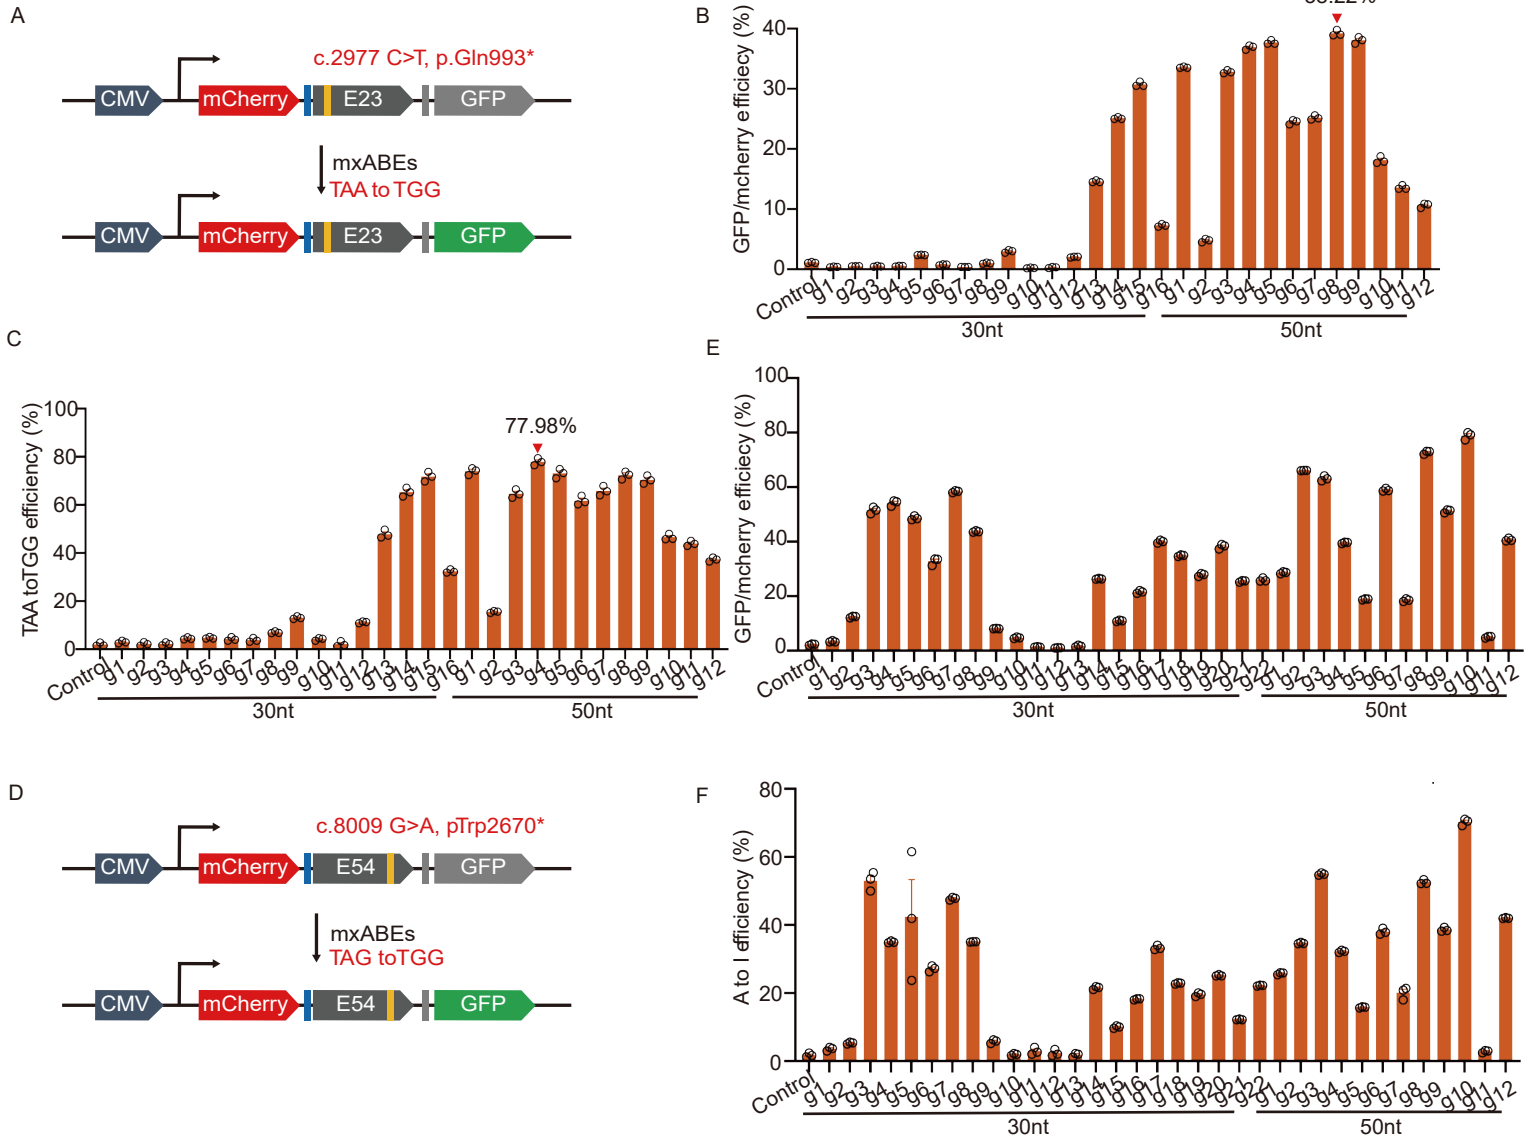

1444 **Figure S6. mxABE-mediated A to I correction of other mutations in the**  
1445 ***DMD* gene.**

1446 Schematic diagram of reporter cassettes containing an mCherry sequence  
1447 fused with 2A peptide, mutant human *DMD* exon 23 (A) or exon 54 (D) and  
1448 ATG-removed GFP. Correction of the stop codon within the target sequence  
1449 would allow EGFP expression. Flow cytometry analysis of GFP expression in  
1450 HEK293T cells transfected with 28 gRNAs targeting exon 23 (B) and exon 54  
1451 (E). Deep sequencing of the reporter RNA after GFP rescue experiment in  
1452 exon 23 (C) and exon 54 (F). Data are represented as mean  $\pm$  SEM (n=3).

1453

1454

1455

1456

1457

1458

1459

1460

1461

1462

1463

1464

1465

1466

1467

1468

1469

1470

1471

1472

1473

1474

1475

1476

1477

1478

1479

1480

1481

1482

1483

1484

1485

1486

1487

Figure S7

A

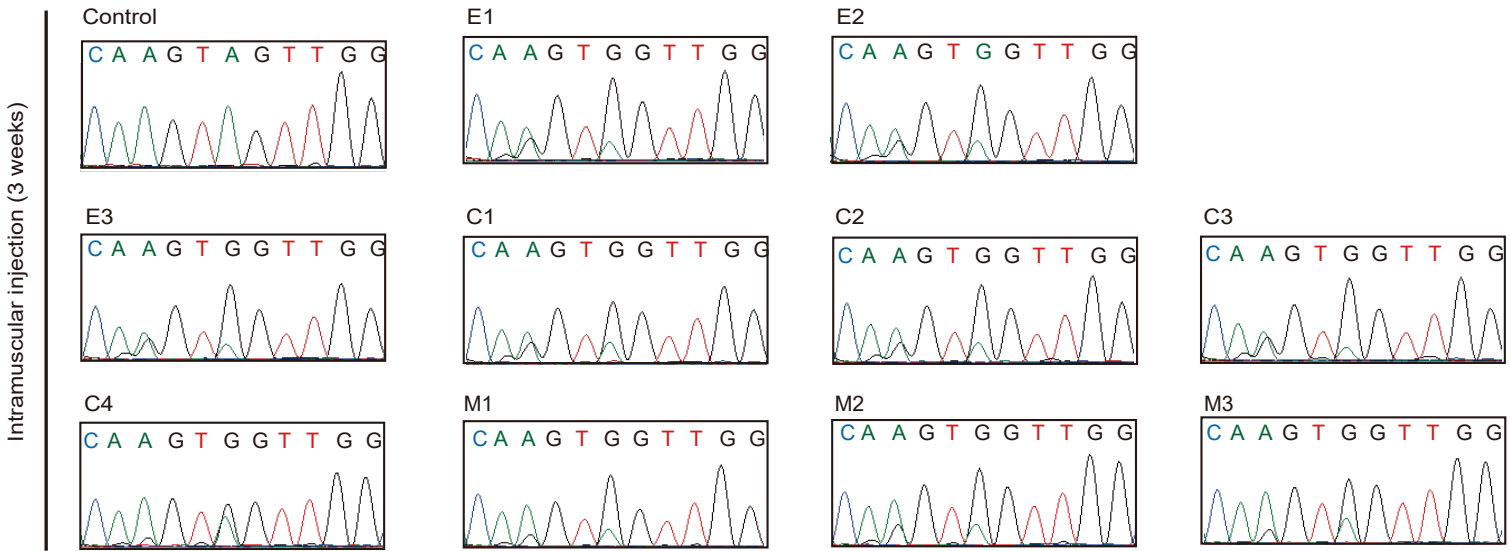

B

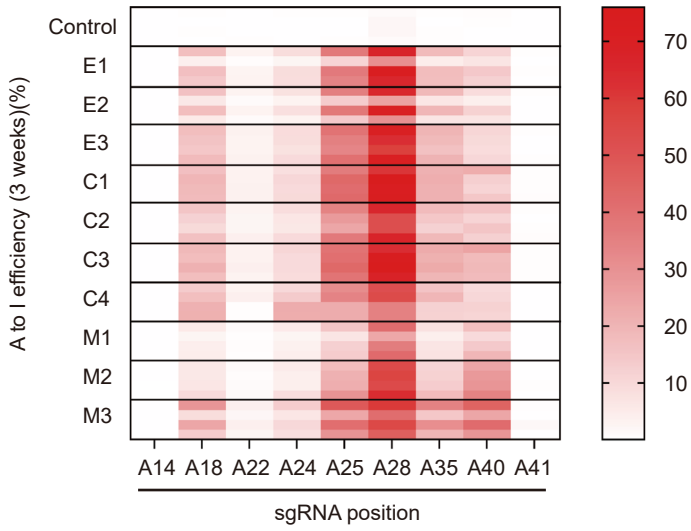

C

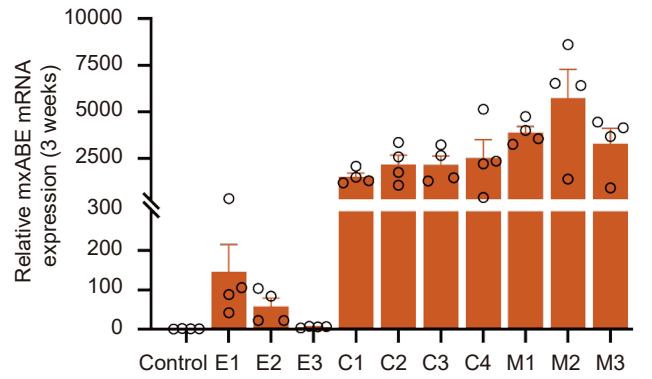

1488 **Figure S7. *In vivo* DMD gene editing by IM injection with mxABEs at 3**  
1489 **weeks.**

1490 A. Representative Sanger sequencing trace of *DMD* transcripts 3 weeks after  
1491 IM injection with ten AAV9-mxABE particles. B. Heat map indicates the A>G  
1492 edits in the vicinity of the target. C. qPCR analysis of mxABE expression in TA  
1493 muscles 3 weeks after intramuscular injection. Values are shown as mean  $\pm$   
1494 SEM (n=4).

1495  
1496  
1497  
1498  
1499  
1500  
1501  
1502  
1503  
1504  
1505  
1506  
1507  
1508  
1509  
1510  
1511  
1512  
1513  
1514  
1515  
1516  
1517  
1518  
1519  
1520  
1521  
1522  
1523  
1524  
1525  
1526  
1527  
1528  
1529  
1530  
1531



Figure S8

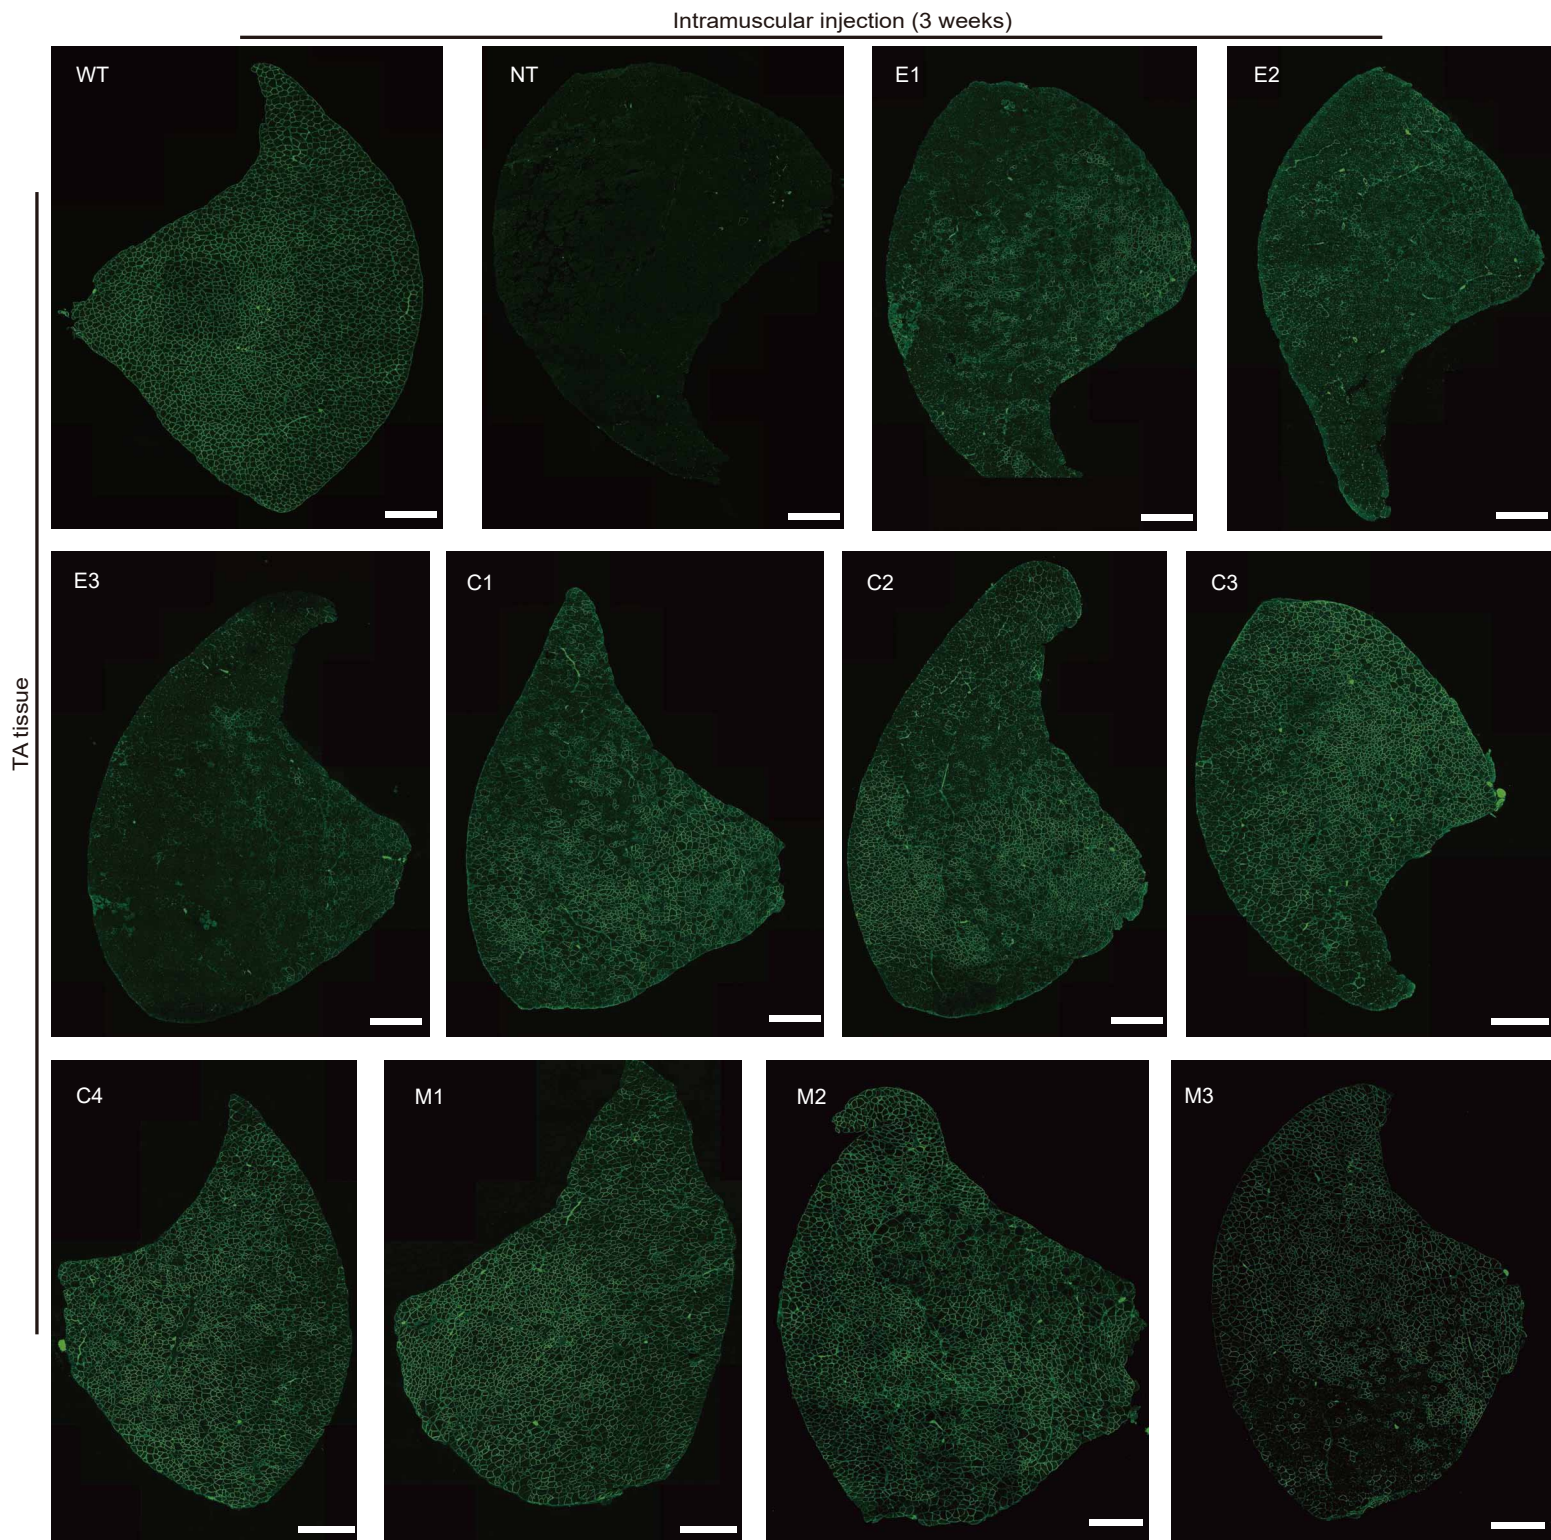

**Figure S8. Rescue of dystrophin expression following IM injection of mxABEs in DMD<sup>E30mut</sup> mice.**

Dystrophin immunohistochemistry of entire TA muscle. Control mice were injected with saline. Dystrophin (Abcam, ab15277) is shown in green. Scale bar, 500  $\mu$ m.

1532  
1533  
1534  
1535  
1536  
1537  
1538  
1539  
1540  
1541  
1542  
1543  
1544  
1545  
1546  
1547  
1548  
1549  
1550  
1551  
1552  
1553  
1554  
1555  
1556  
1557  
1558  
1559  
1560  
1561  
1562  
1563  
1564  
1565  
1566  
1567  
1568  
1569  
1570  
1571  
1572  
1573  
1574  
1575

Figure S9

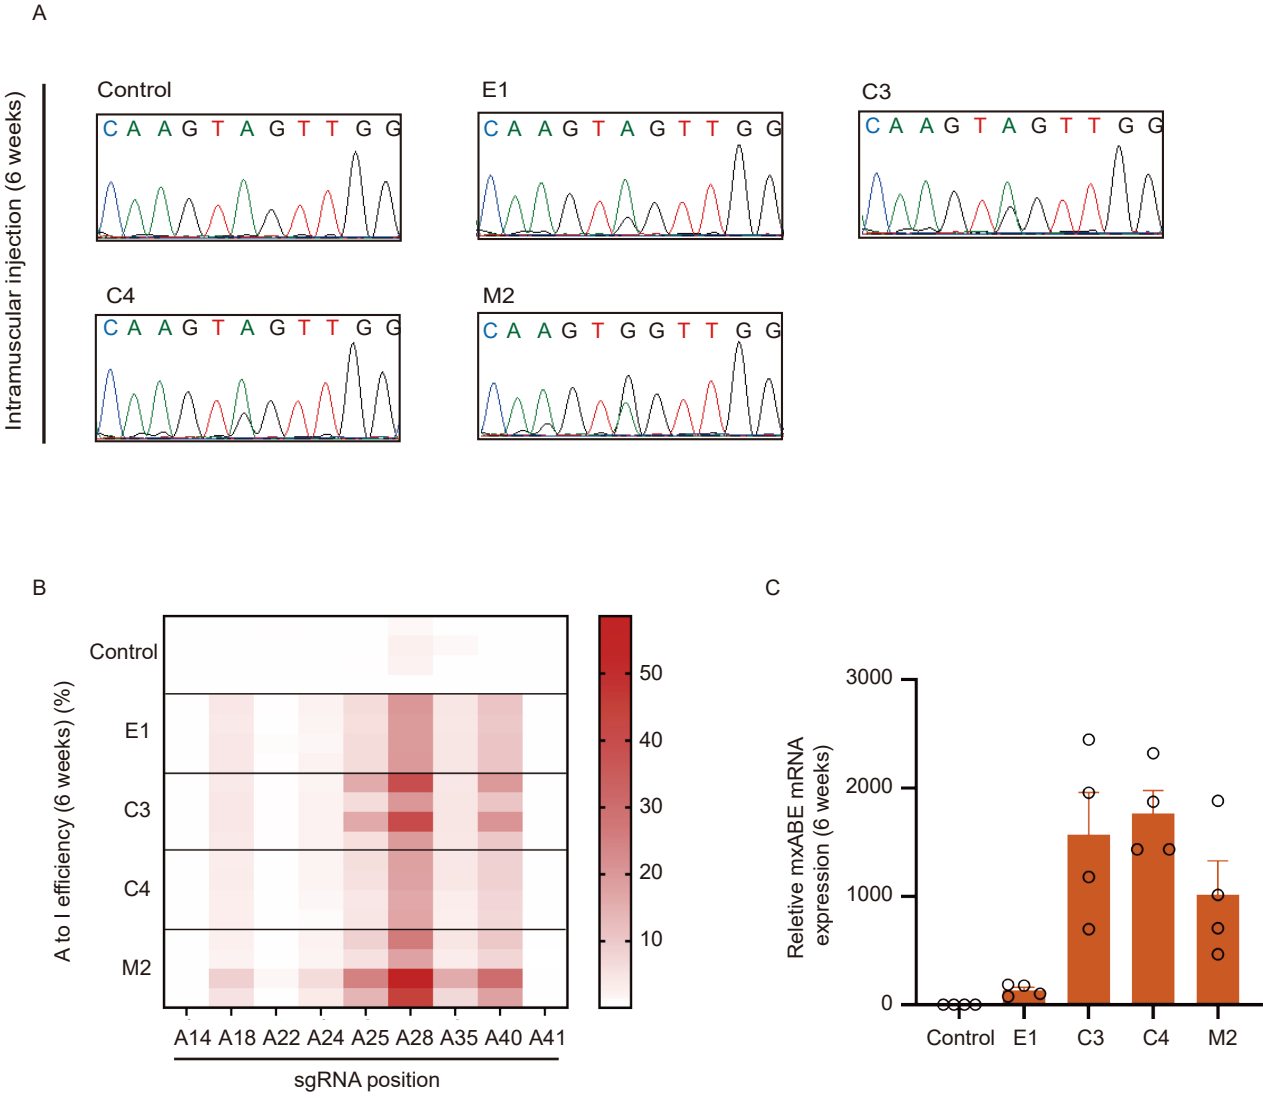

1576 **Figure S9. In vivo *DMD* gene editing by IM injection with mxABEs after 6**  
1577 **weeks.**

1578 A. Representative Sanger sequencing trace of *DMD* transcripts 6 weeks after  
1579 IM injection with four AAV9-mxABE particles. B. Heat map indicates the A>G  
1580 edits in the vicinity of the target. C. qPCR analysis of mxABE expression in TA  
1581 muscles 6 weeks after intramuscular injection. Values are shown as mean  $\pm$   
1582 SEM (n=4).

1583

1584

1585

1586

1587

1588

1589

1590

1591

1592

1593

1594

1595

1596

1597

1598

1599

1600

1601

1602

1603

1604

1605

1606

1607

1608

1609

1610

1611

1612

1613

1614

1615

1616

1617

1618

1619

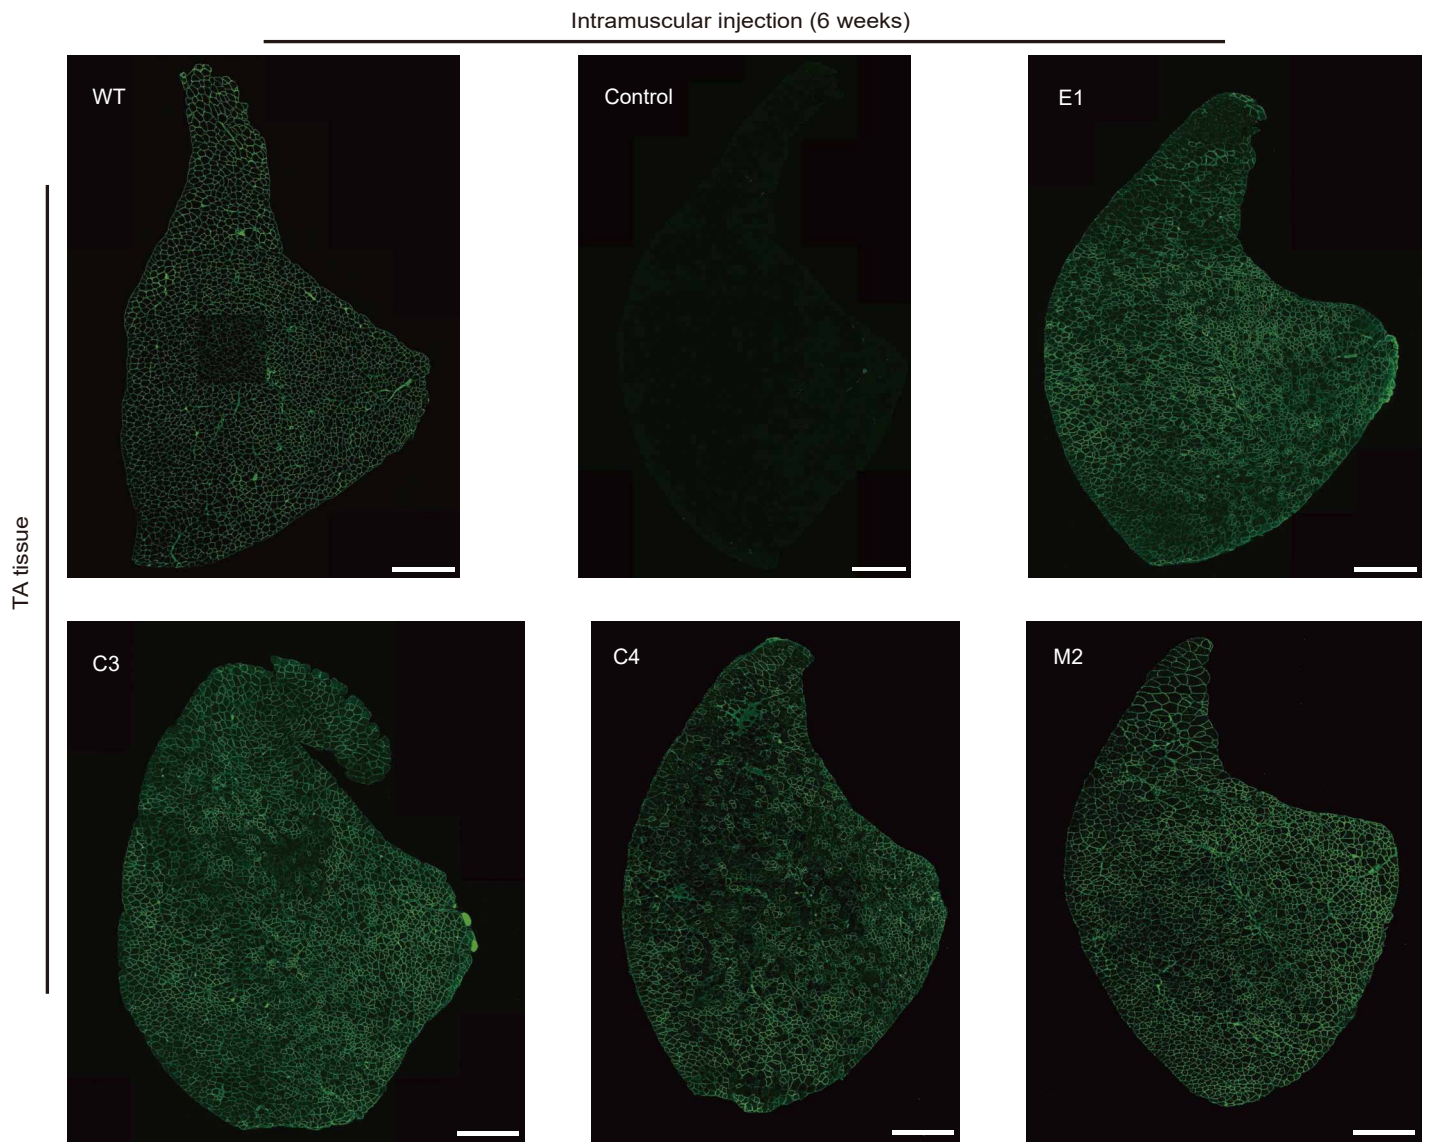

1620 **Figure S10. Intramuscular AAV9 delivery of gene editing components**  
1621 **rescues dystrophin expression.**

1622 Immunohistochemistry of dystrophin in entire TA muscle 6 weeks after  
1623 intramuscular AAV9 delivery. Control mice were injected with saline.  
1624 Dystrophin (Abcam, ab15277) is showed in green. Scale bar, 500  $\mu$ m.

1625

1626

1627

1628

1629

1630

1631

1632

1633

1634

1635

1636

1637

1638

1639

1640

1641

1642

1643

1644

1645

1646

1647

1648

1649

1650

1651

1652

1653

1654

1655

1656

1657

1658

1659

1660

1661

1662

1663

Figure S11

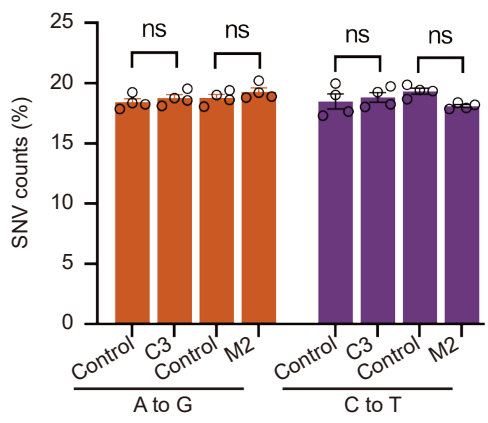

1664 **Figure S11. Calculation of SNV counts by transcriptome-wide off-target**  
1665 **analysis *in vivo*.**

1666 The transcriptome-wide off-target effect of two AAV9-mxABEs (C3 and M2)  
1667 were analyzed *in vivo*. Control mice were injected with saline. Values are  
1668 shown as mean  $\pm$  SEM (n=4). NS, not statistically significant using unpaired  
1669 two-tailed Student's t tests (P<0.01).

1670

1671

1672

1673

1674

1675

1676

1677

1678

1679

1680

1681

1682

1683

1684

1685

1686

1687

1688

1689

1690

1691

1692

1693

1694

1695

1696

1697

1698

1699

1700

1701

1702

1703

1704

1705

1706

1707



Figure S12

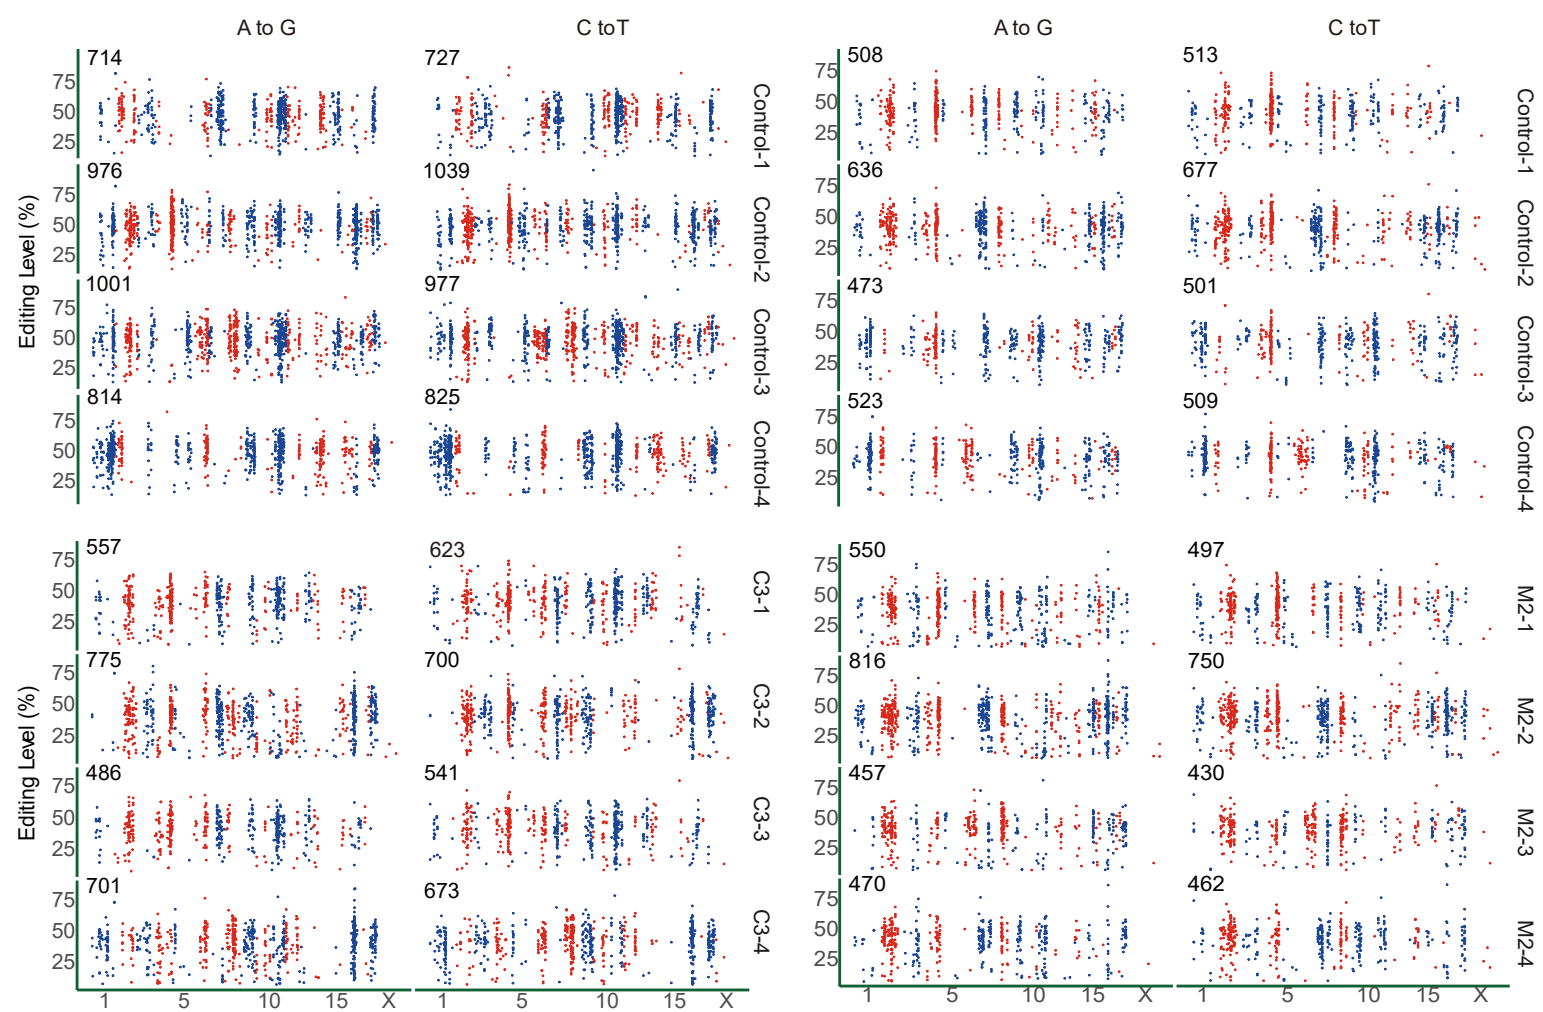

1708 **Figure S12. Manhattan plots of transcriptome-wide off-target RNA editing**  
1709 **analysis *in vivo*.**

1710 Control mice were injected with saline. The x and y axes are proportionally  
1711 enlarged with each Manhattan plot to make the axis legend clear. n=4.

1712

1713

1714

1715

1716

1717

1718

1719

1720

1721

1722

1723

1724

1725

1726

1727

1728

1729

1730

1731

1732

1733

1734

1735

1736

1737

1738

1739

1740

1741

1742

1743

1744

1745

1746

1747

1748

1749

1750

1751

Figure S13

A

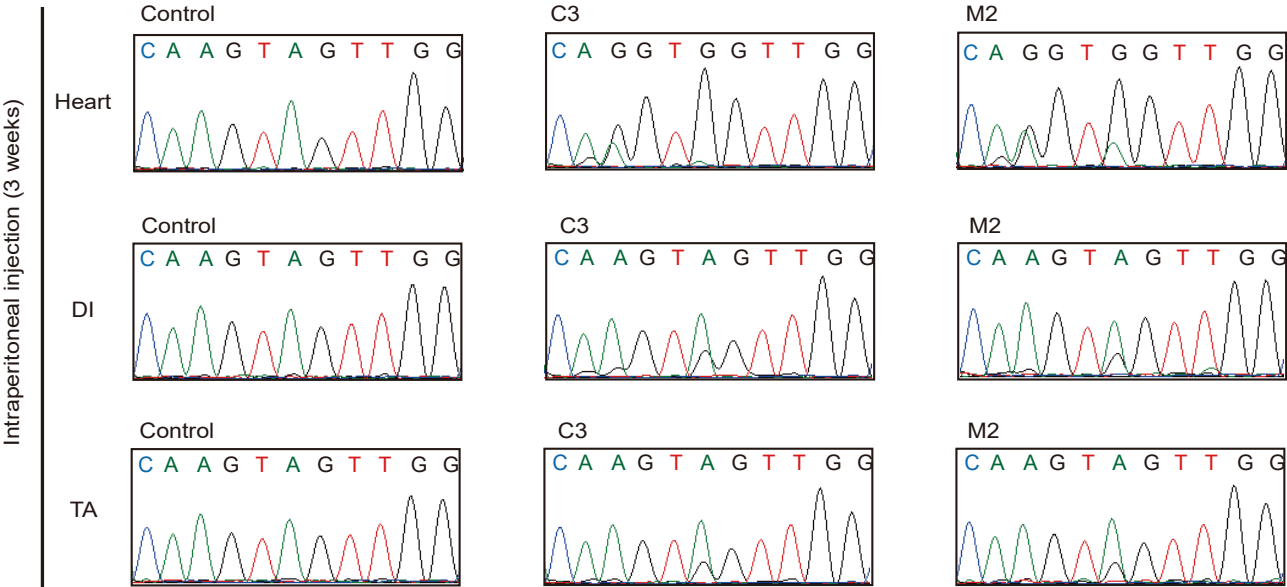

B

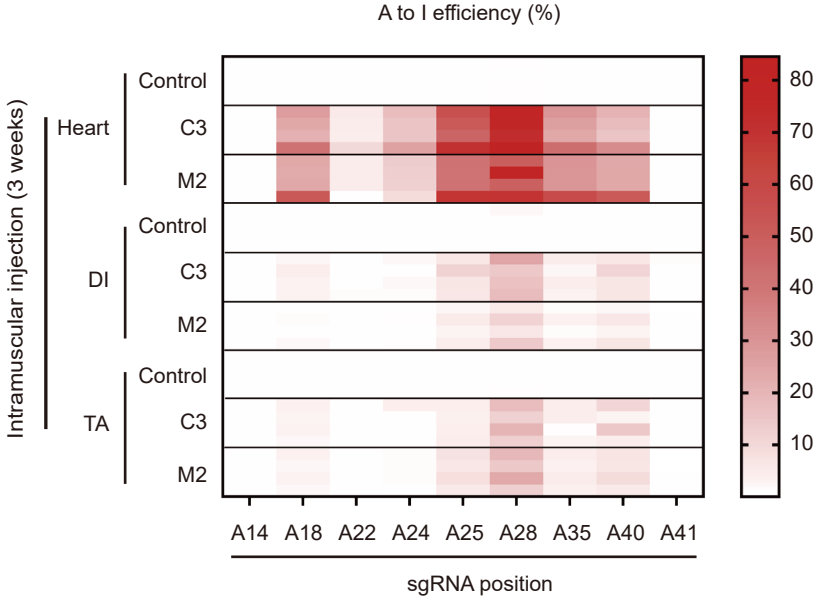

1752 **Figure S13. Gene editing 3 weeks after systemic delivery of mxABEs in**  
1753 **DMD<sup>E30mut</sup> mice.**

1754 A. Representative Sanger sequencing trace of *DMD* transcripts in TA, DI, and  
1755 cardiac muscle 3 weeks after intraperitoneal (IP) injection with C3 and M2  
1756 particles. B. Heat map indicates the A>G edits in the vicinity of the target in  
1757 indicated tissues. n=4.

1758

1759

1760

1761

1762

1763

1764

1765

1766

1767

1768

1769

1770

1771

1772

1773

1774

1775

1776

1777

1778

1779

1780

1781

1782

1783

1784

1785

1786

1787

1788

1789

1790

1791

1792

1793

1794

1795

A

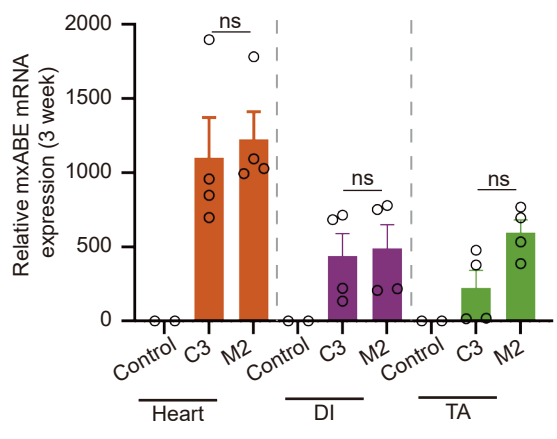

B

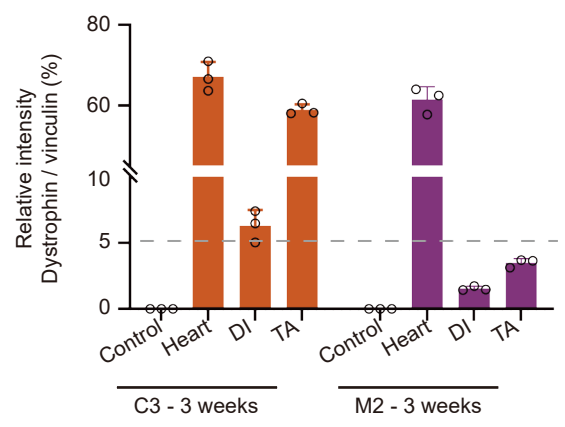

**Figure S14. AAV9-mxABE expression and dystrophin protein levels after systemic delivery in DMD<sup>E30mut</sup> mice.**

A. qPCR analysis of mxABE expression in TA, DI, and heart muscles 3 weeks after systemic delivery (n=4). B. Relative dystrophin (Sigma, D8168) intensity was calibrated against a vinculin (CST, 13901S) internal control before normalizing to the WT control. The results showed restoration of dystrophin in TA, DI, and heart muscles of DMD<sup>E30mut</sup> mice 3 weeks after systemic delivery of AAV9-packaged C3 and M2 (n=3). Values are shown as mean ± SEM. NS, not statistically significant using unpaired two-tailed Student's t tests (P<0.01).

1796  
1797  
1798  
1799  
1800  
1801  
1802  
1803  
1804  
1805  
1806  
1807  
1808  
1809  
1810  
1811  
1812  
1813  
1814  
1815  
1816  
1817  
1818  
1819  
1820  
1821  
1822  
1823  
1824  
1825  
1826  
1827  
1828  
1829  
1830  
1831  
1832  
1833  
1834  
1835  
1836  
1837  
1838  
1839

Figure S15

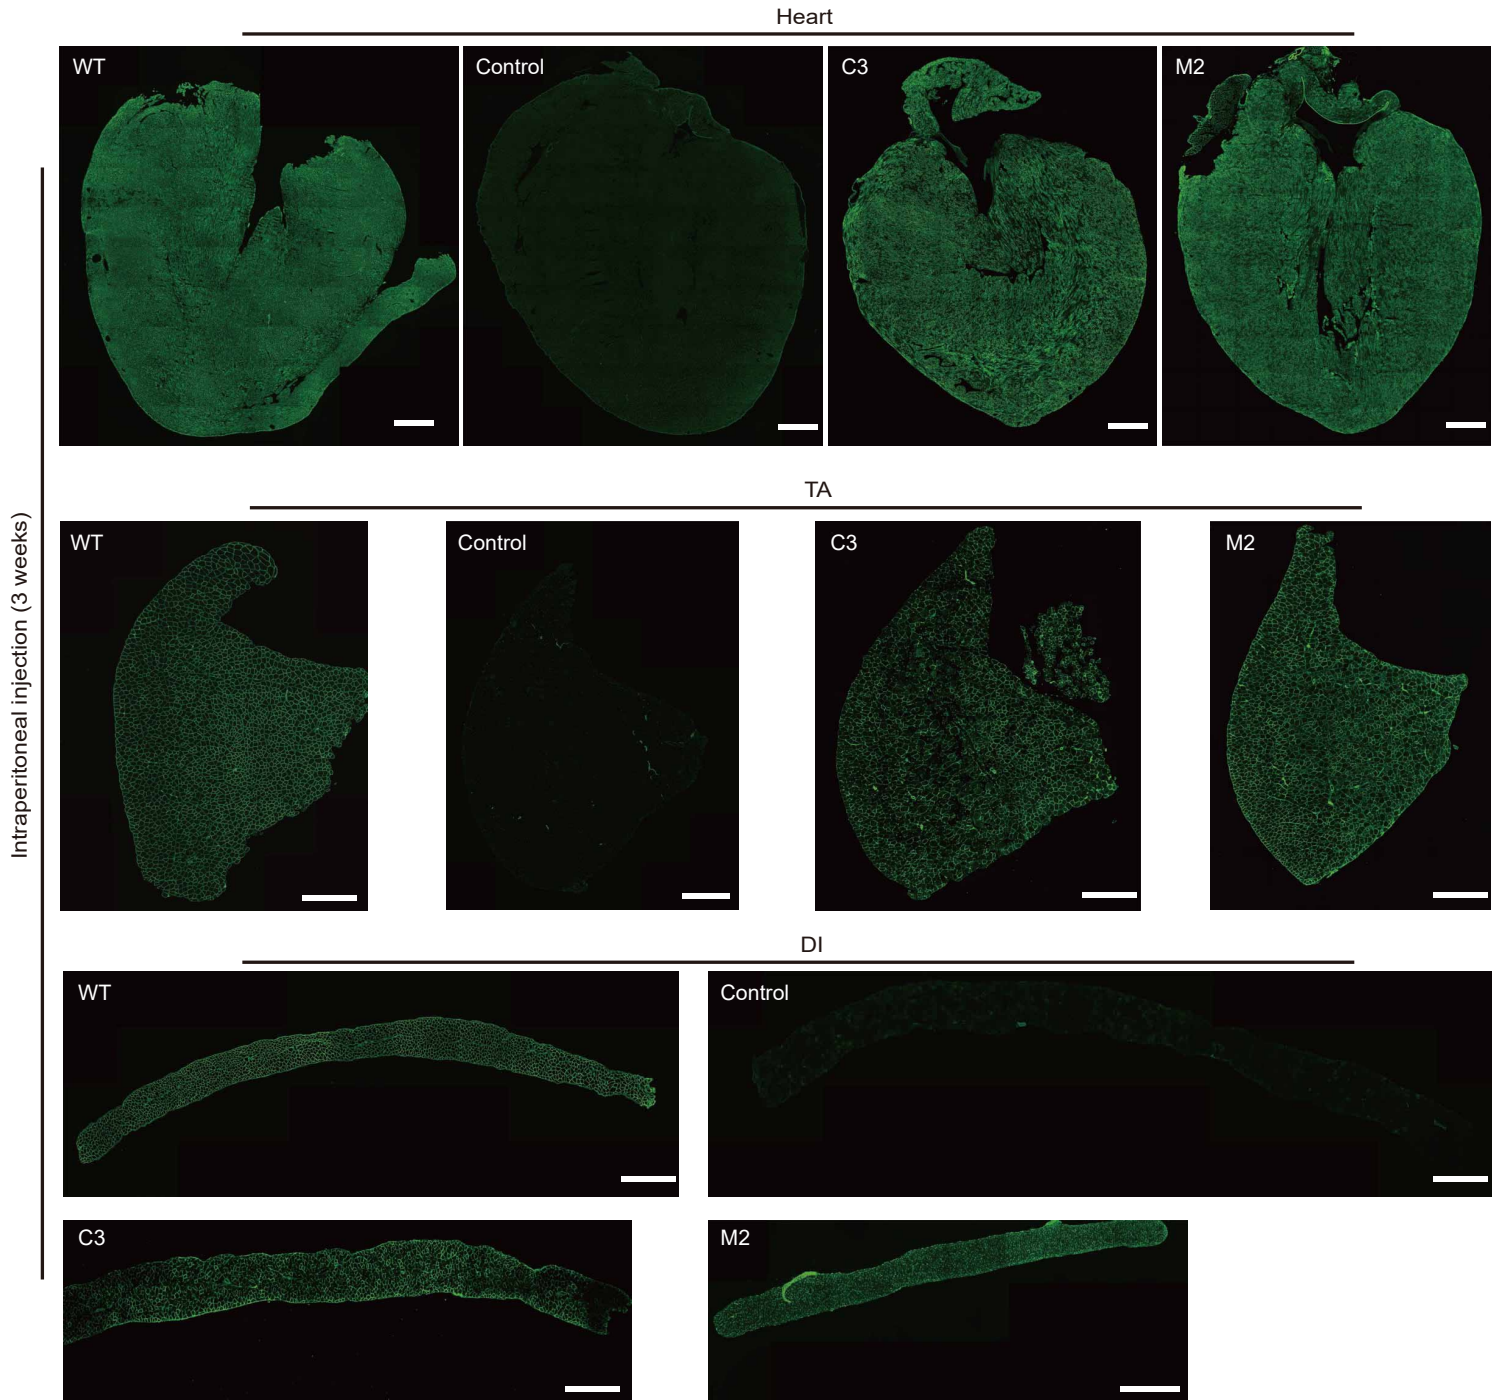

1840 **Figure S15. Histological analysis of dystrophin expression 3 weeks after**  
1841 **systemic delivery of AAV9-mxABE in DMD<sup>E30mut</sup> mice.**

1842 Whole-muscle scanning of TA, DI, and heart of DMD<sup>E30mut</sup> mice 3 weeks after  
1843 systemic delivery AAV9-C3 and M2 particles. Control mice were injected with  
1844 saline. Dystrophin (Abcam, ab15277) is showed in green. Scale bar, 500  $\mu$ m.

1845

1846

1847

1848

1849

1850

1851

1852

1853

1854

1855

1856

1857

1858

1859

1860

1861

1862

1863

1864

1865

1866

1867

1868

1869

1870

1871

1872

1873

1874

1875

1876

1877

1878

1879

1880

1881

1882

1883



Figure S16

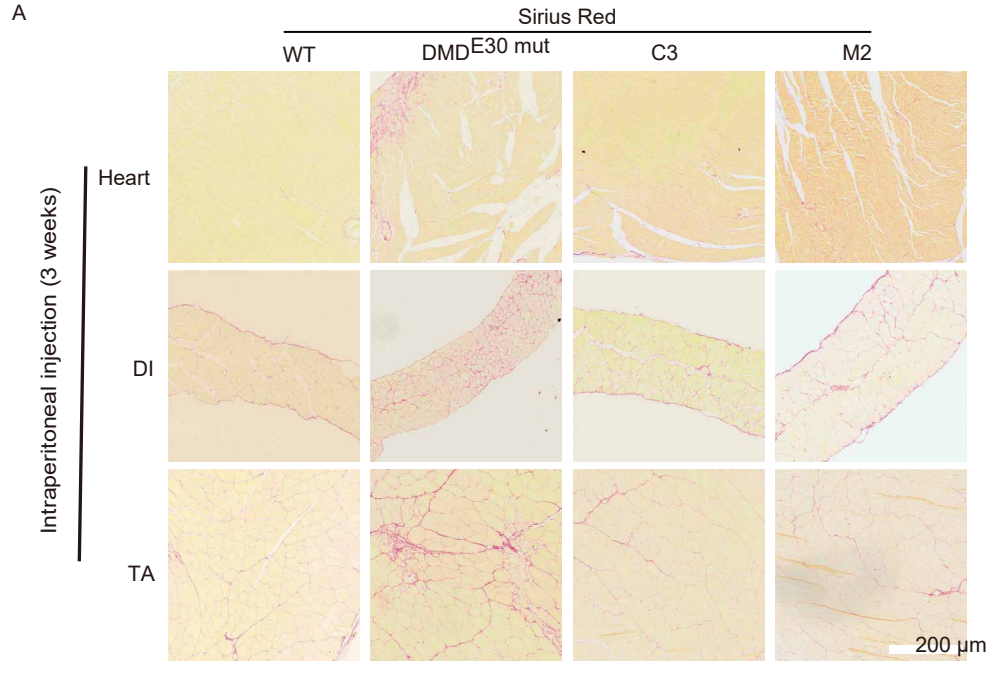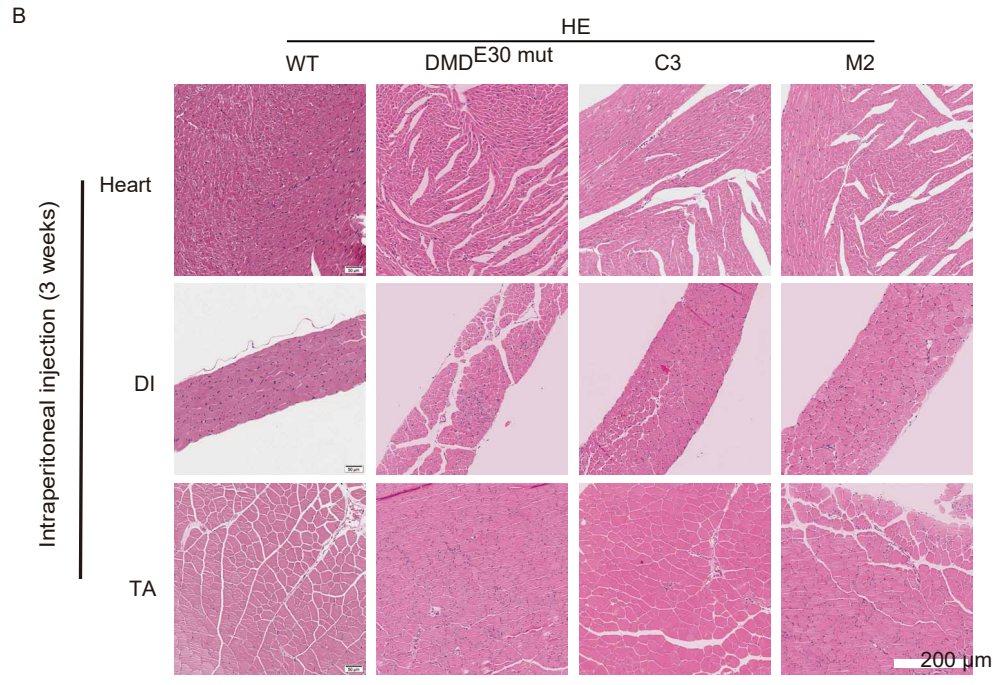

1884 **Figure S16. Histological analysis 3 weeks after systemic delivery of**  
1885 **AAV9-mxABE.**

1886 Sirius red staining (A) and HE staining (A) of TA, DI, and heart of WT,  
1887 untreated DMD<sup>E30mut</sup> mice and DMD<sup>E30mut</sup> mice treated with AAV9-mxABE 3  
1888 weeks after systemic injection. n=4 for each group. Scale bars, 200  $\mu$ m.

1889  
1890  
1891  
1892  
1893  
1894  
1895  
1896  
1897  
1898  
1899  
1900  
1901  
1902  
1903  
1904  
1905  
1906  
1907  
1908  
1909  
1910  
1911  
1912  
1913  
1914  
1915  
1916  
1917  
1918  
1919  
1920  
1921  
1922  
1923  
1924  
1925  
1926  
1927

Figure S17

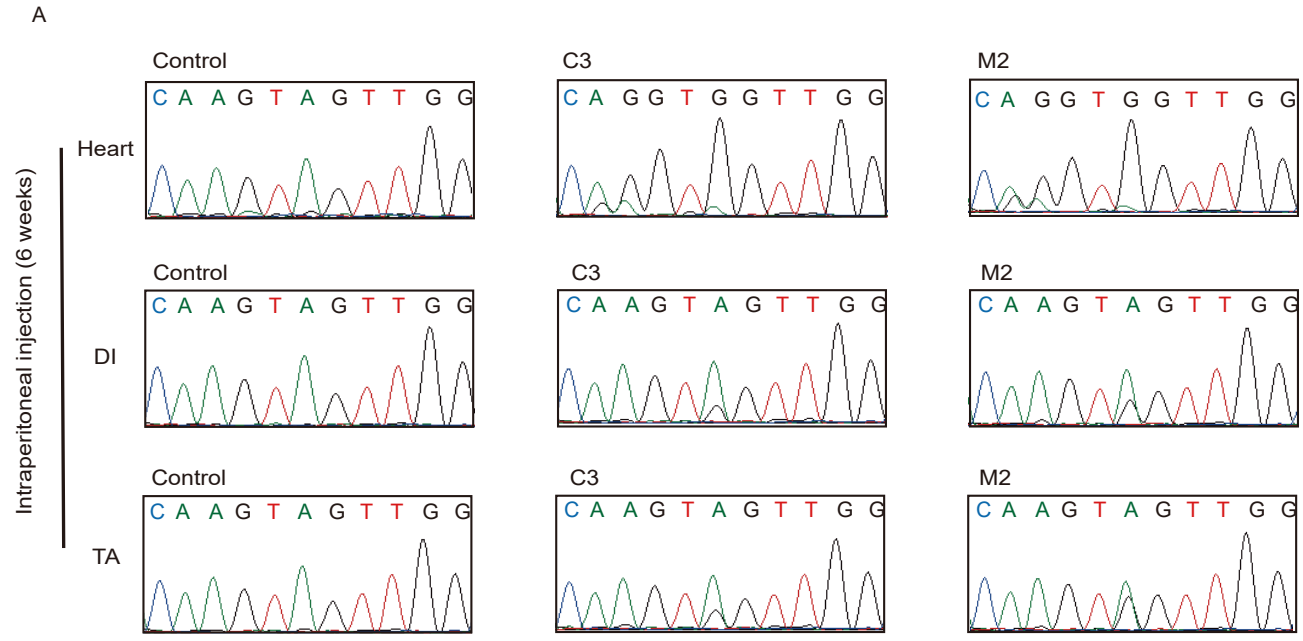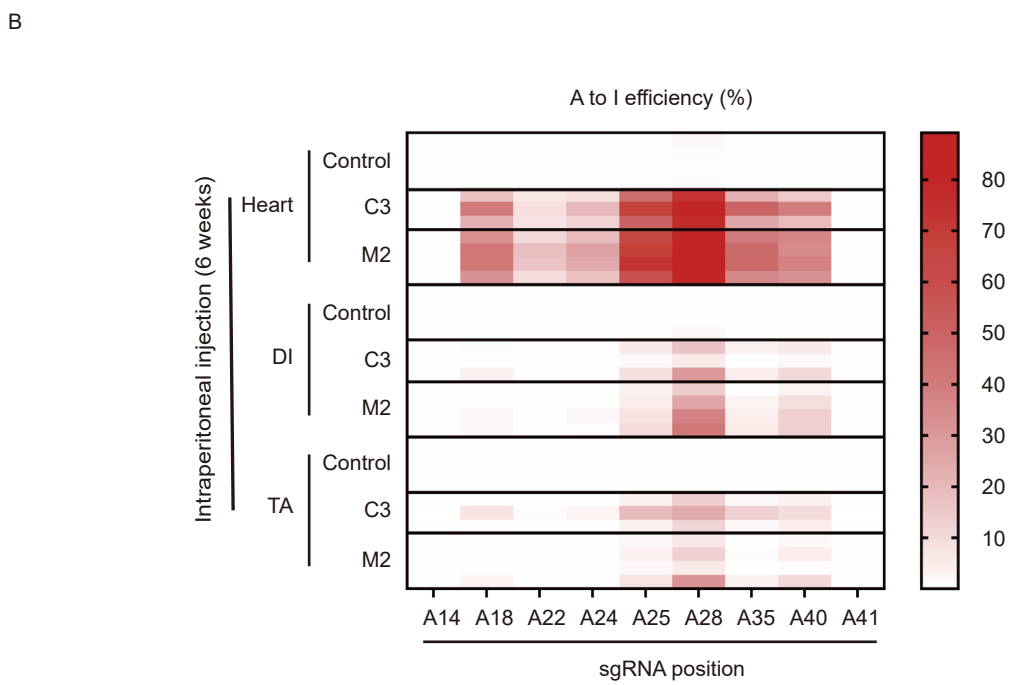

1928 **Figure S17. Base editing efficiency achieved by systemic delivery of**  
1929 **mxABE after 6 weeks.**

1930 A. Representative Sanger sequencing trace of *DMD* transcripts in TA, DI, and  
1931 heart tissues 6 weeks after intraperitoneal (IP) injection with C3 and M2  
1932 particles. B. Heat map shows base editing rates in tissues indicated after IP  
1933 injection with C3 (n=3) and M2 (n=4).

1934

1935

1936

1937

1938

1939

1940

1941

1942

1943

1944

1945

1946

1947

1948

1949

1950

1951

1952

1953

1954

1955

1956

1957

1958

1959

1960

1961

1962

1963

1964

1965

1966

1967

1968

1969

1970

1971

Figure S18

A

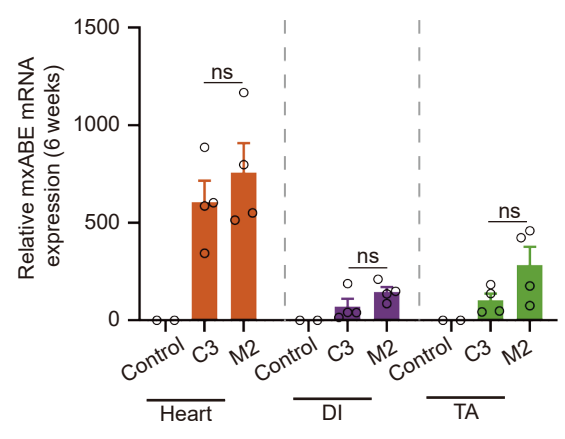

B

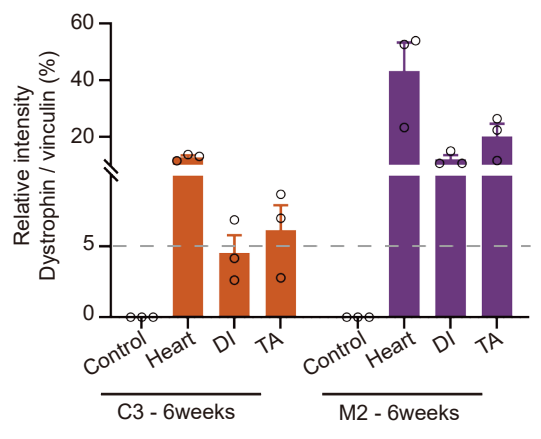

C

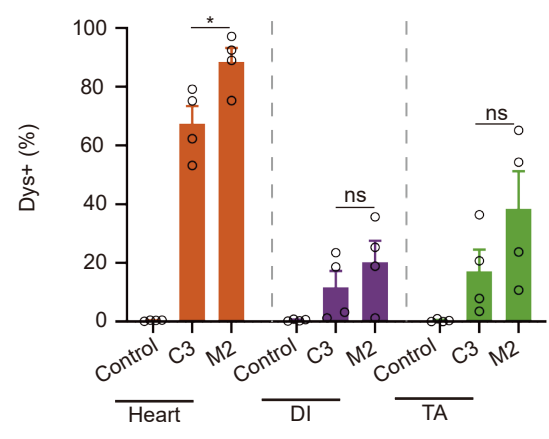

**Figure S18. mxABE expression and dystrophin restoration level after 6-week administration of AAV-mxABE systemically.**

A. qPCR analysis of mxABE expression in TA, DI, and heart muscles 6 weeks after systemic delivery (n=4). B. Relative dystrophin (Sigma, D8168) intensity was calibrated against a vinculin (CST, 13901S) internal control before normalizing to the WT control. The results showed restoration of dystrophin in TA, DI, and cardiac muscles of DMD<sup>E30mut</sup> mice 6 weeks after systemic delivery of C3 and M2 AAV-mxABE (n=3). C. Percentage of Dys+ tissue area in TA, DI, and heart from treated and untreated DMD<sup>E30mut</sup> mice (n=4). Values are shown as mean ± SEM. NS, not statistically significant using unpaired two-tailed Student's t test (P<0.01).

1972  
1973  
1974  
1975  
1976  
1977  
1978  
1979  
1980  
1981  
1982  
1983  
1984  
1985  
1986  
1987  
1988  
1989  
1990  
1991  
1992  
1993  
1994  
1995  
1996  
1997  
1998  
1999  
2000  
2001  
2002  
2003  
2004  
2005  
2006  
2007  
2008  
2009  
2010  
2011  
2012  
2013  
2014  
2015

Figure S19

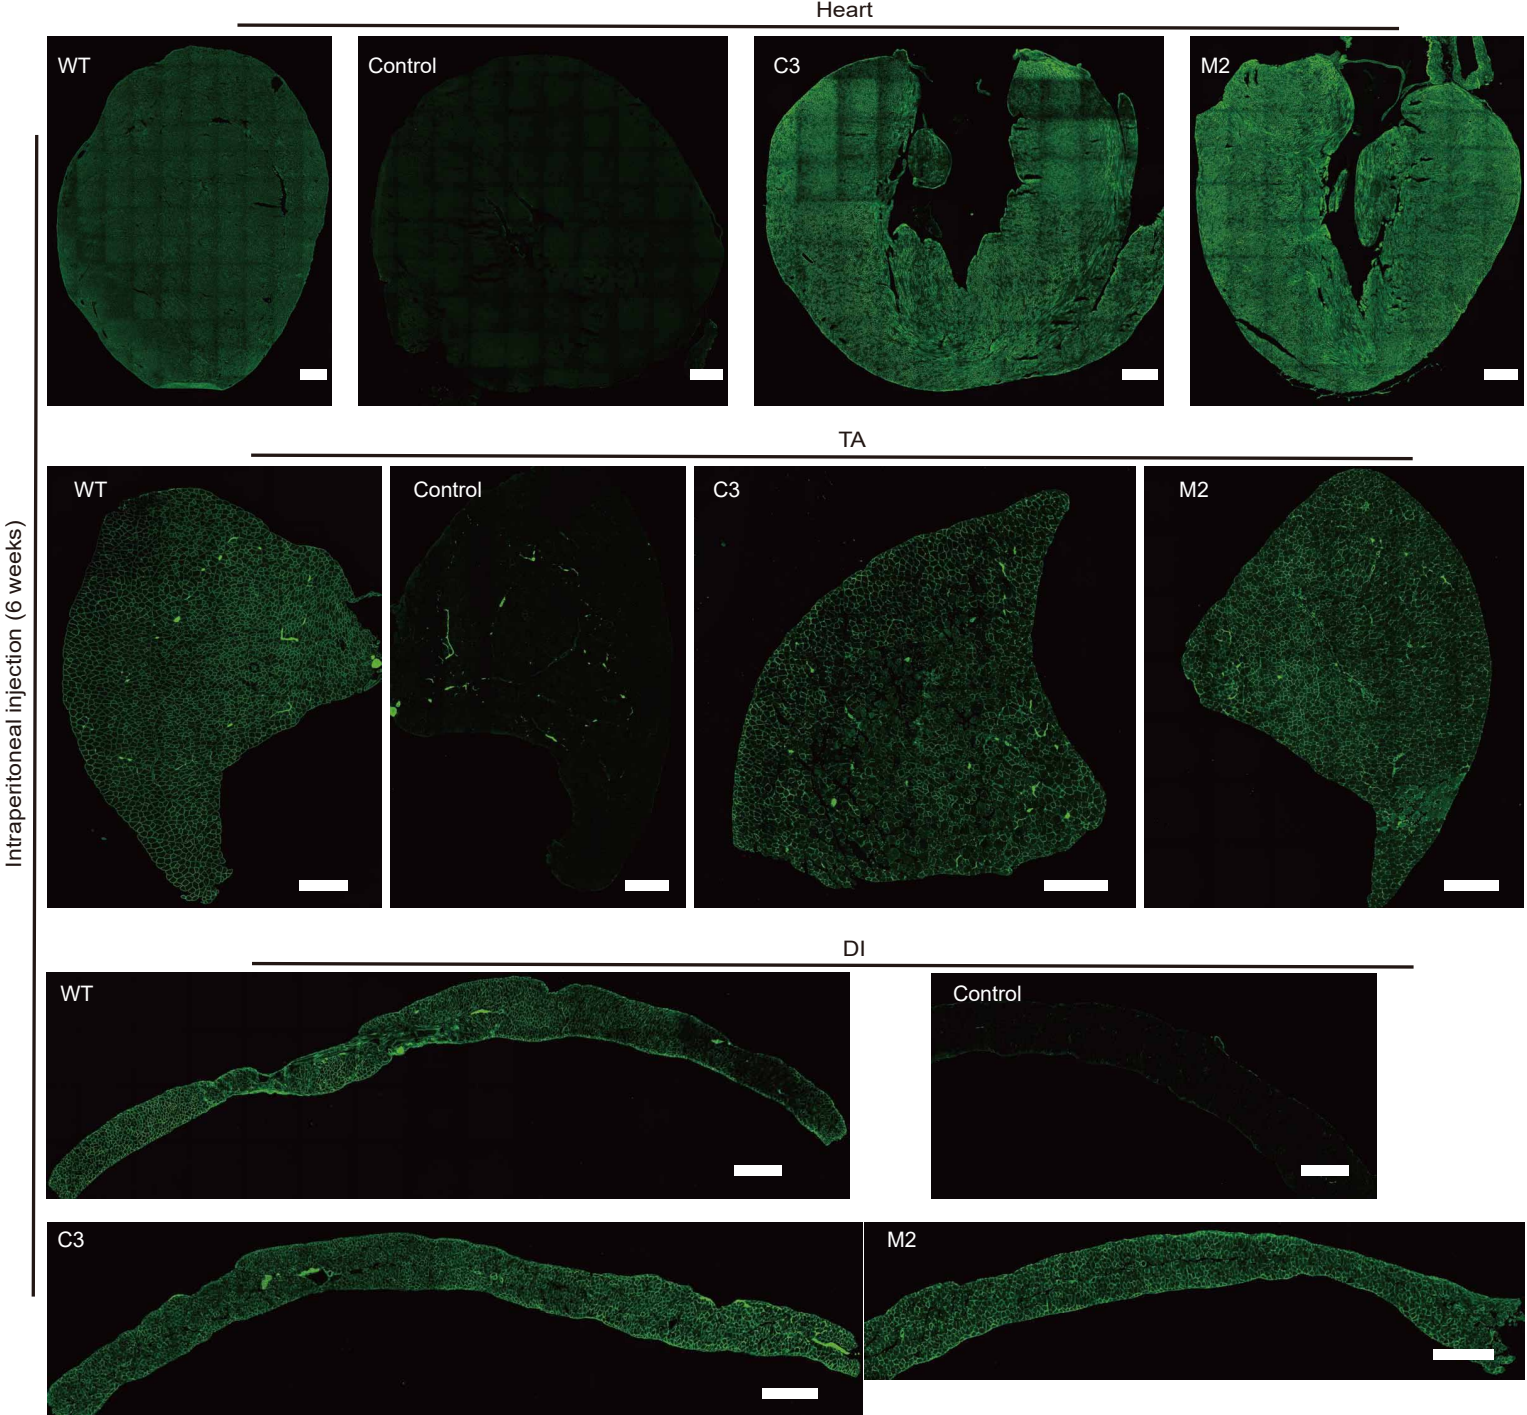

**Figure S19. Immunostaining of dystrophin in heart, TA, and DI tissues 6 weeks after systemic administration of AAV-mxABE.**

Whole-muscle scanning of TA, DI, and heart muscle of DMD<sup>E30mut</sup> mice 6 weeks after systemic delivery of AAV9-C3 and M2 particles. Control mice were injected with saline. Dystrophin (Abcam, ab15277) is shown in green. Scale bar, 500  $\mu$ m. Images shown in both Figure 6C and Figure S19 were obtained from the same tissue at 20x magnification. Figure 6C showed the local region staining image rather than the reconstituted whole-tissue scanning image in Figure S19.

2016  
2017  
2018  
2019  
2020  
2021  
2022  
2023  
2024  
2025  
2026  
2027  
2028  
2029  
2030  
2031  
2032  
2033  
2034  
2035  
2036  
2037  
2038  
2039  
2040  
2041  
2042  
2043  
2044  
2045  
2046  
2047  
2048  
2049  
2050  
2051  
2052  
2053  
2054  
2055  
2056  
2057  
2058  
2059



Figure S20

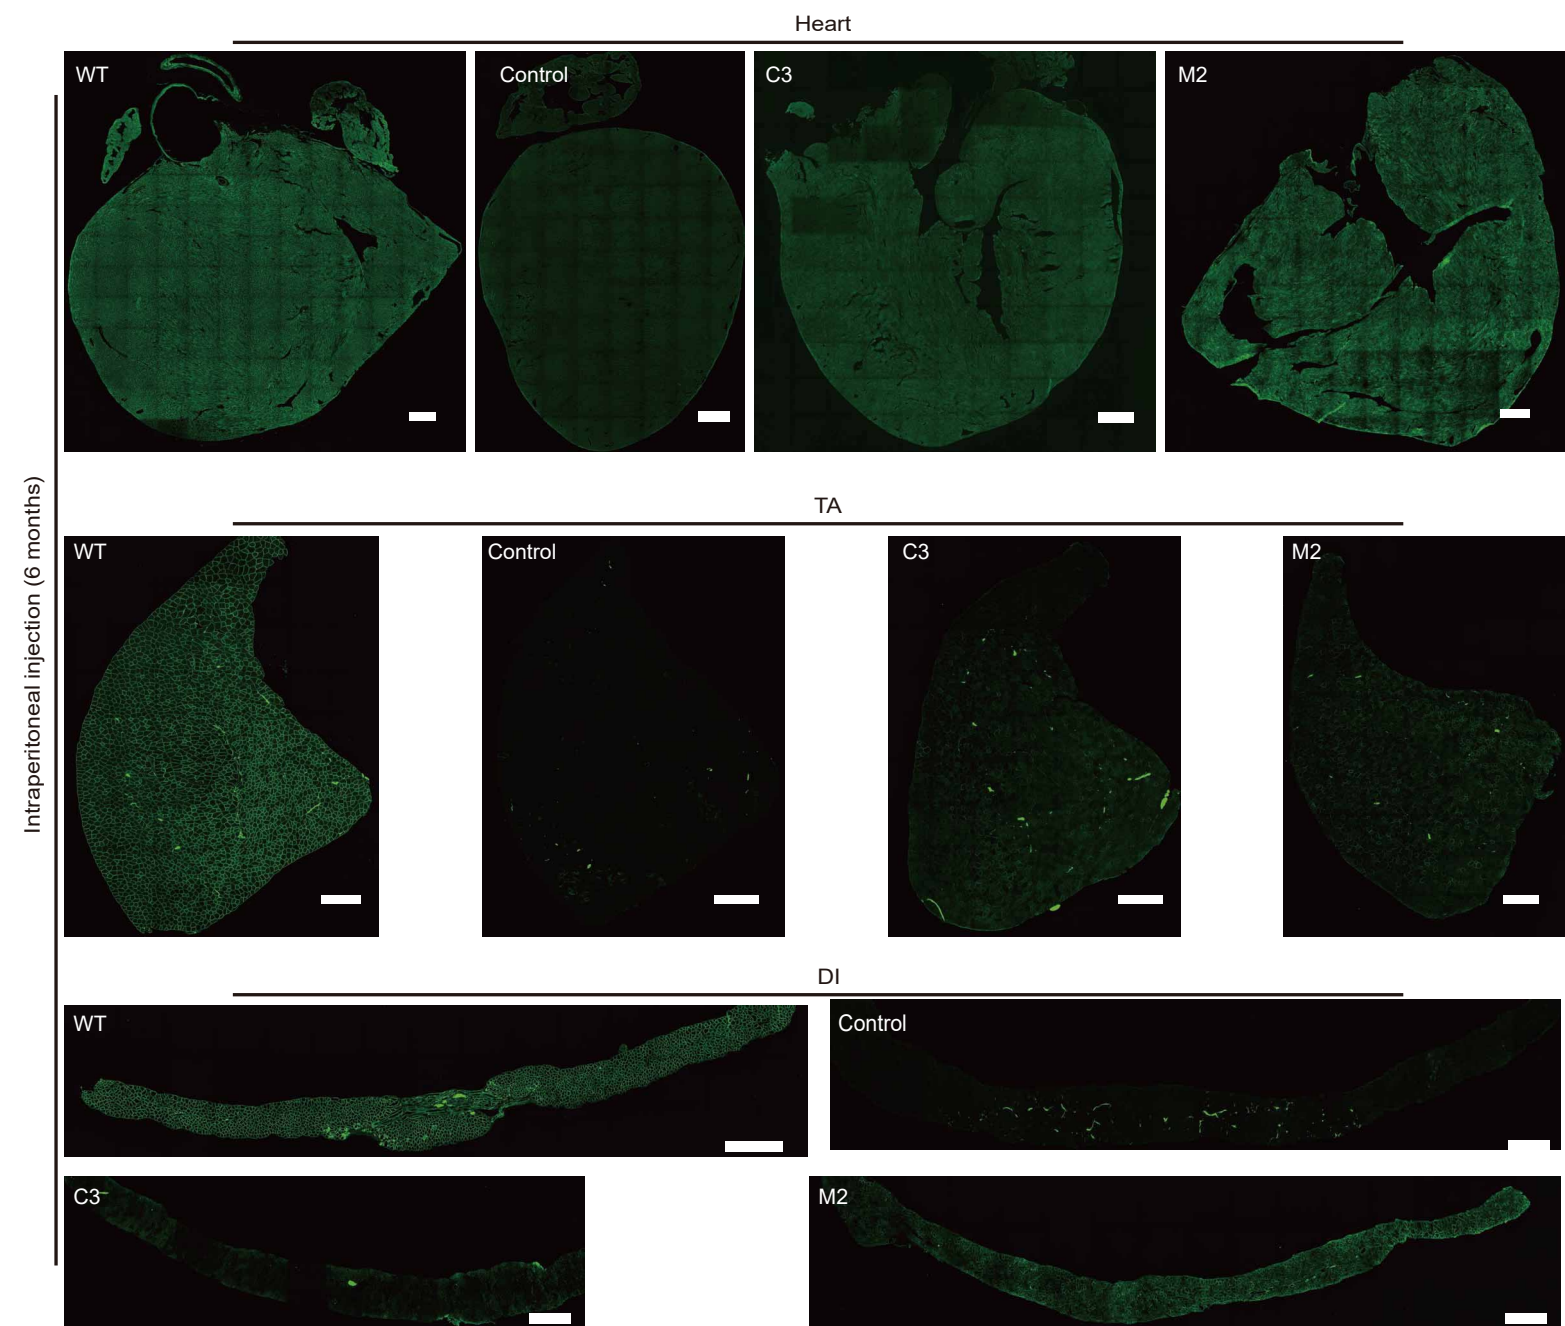

**Figure S20. Immunostaining of dystrophin in heart, TA, and DI 6 months after systemic administration of AAV-mxABE.**

Whole-muscle scanning of TA, DI, and heart muscle of DMD<sup>E30mut</sup> mice 6 months after systemic delivery of AAV9-C3 and M2 particles. Control mice were injected with saline. Dystrophin (Abcam, ab15277) is shown in green. Scale bar, 500  $\mu$ m.

2060  
2061  
2062  
2063  
2064  
2065  
2066  
2067  
2068  
2069  
2070  
2071  
2072  
2073  
2074  
2075  
2076  
2077  
2078  
2079  
2080  
2081  
2082  
2083  
2084  
2085  
2086  
2087  
2088  
2089  
2090  
2091  
2092  
2093  
2094  
2095  
2096  
2097  
2098  
2099  
2100  
2101  
2102  
2103

Figure S21

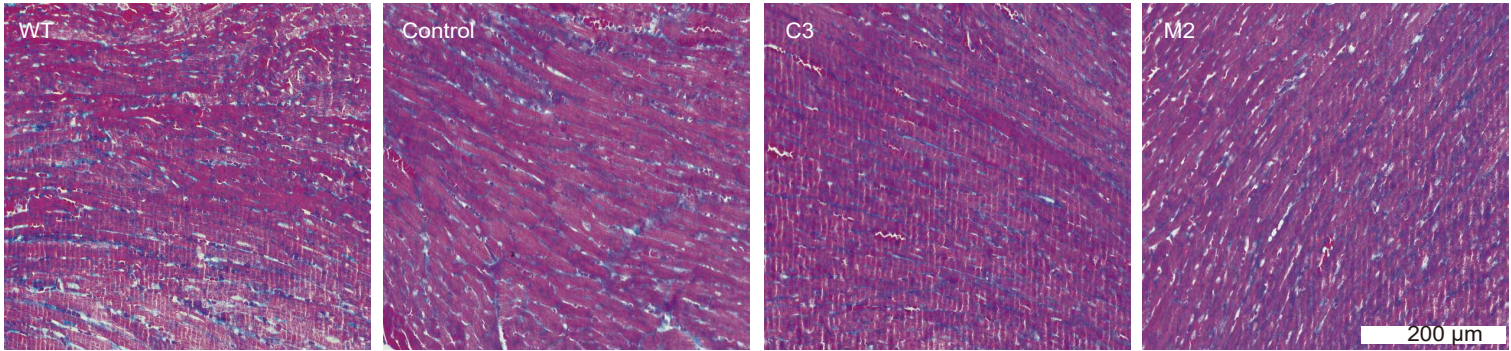

2104 **Figure S21. Collagen staining shows no obvious fibrosis in treated and**  
2105 **untreated hearts 6 months after systemic administration of AAV-mxABE.**  
2106 Scale bar, 200  $\mu\text{m}$ .

2107

2108

2109

2110

2111

2112

2113

2114

2115

2116

2117

2118

2119

2120

2121

2122

2123

2124

2125

2126

2127

2128

2129

2130

2131

2132

2133

2134

2135

2136

2137

2138

2139

2140

2141

2142

2143

2144

2145

2146

2147

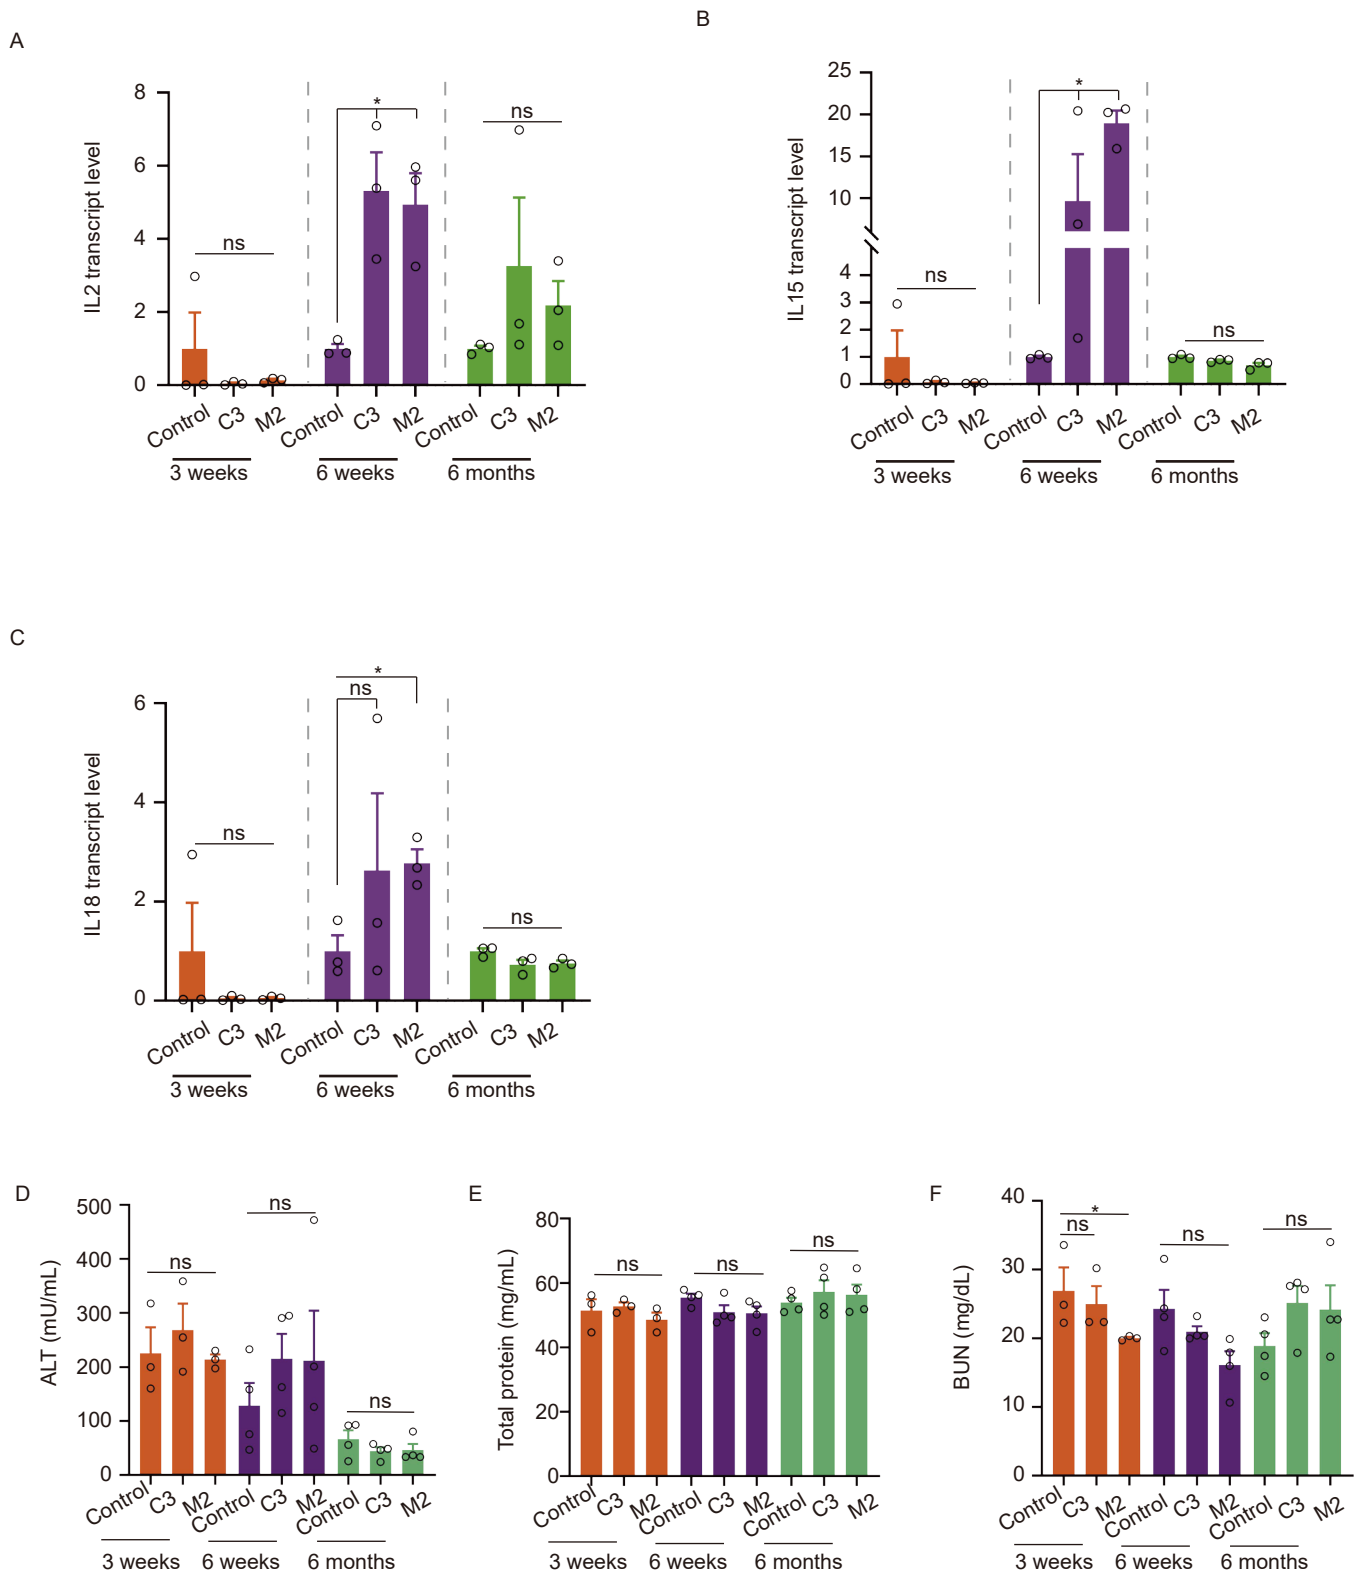

2148 **Figure S22. Host immune response to AAV-mxABE treatment indicates**  
2149 **no overt toxicity after 6 months.**

2150 (A-C) IL2, IL15, and IL18 transcript levels at baseline for untreated mice, 3  
2151 weeks, 6 weeks, and 6 months for treated mice (n=3). (D-F) No obvious  
2152 change in ALT, total protein and BUN level after AAV-mxABE treatment (n=3).  
2153 Significance is indicated by asterisk ( $P < 0.05$ ). NS represents not statistically  
2154 significant using unpaired two-tailed Student's t test.

2155  
2156  
2157  
2158  
2159  
2160  
2161  
2162  
2163  
2164  
2165  
2166  
2167  
2168  
2169  
2170  
2171  
2172  
2173  
2174  
2175  
2176  
2177  
2178  
2179  
2180  
2181  
2182  
2183  
2184  
2185  
2186  
2187  
2188  
2189  
2190  
2191

Figure S23

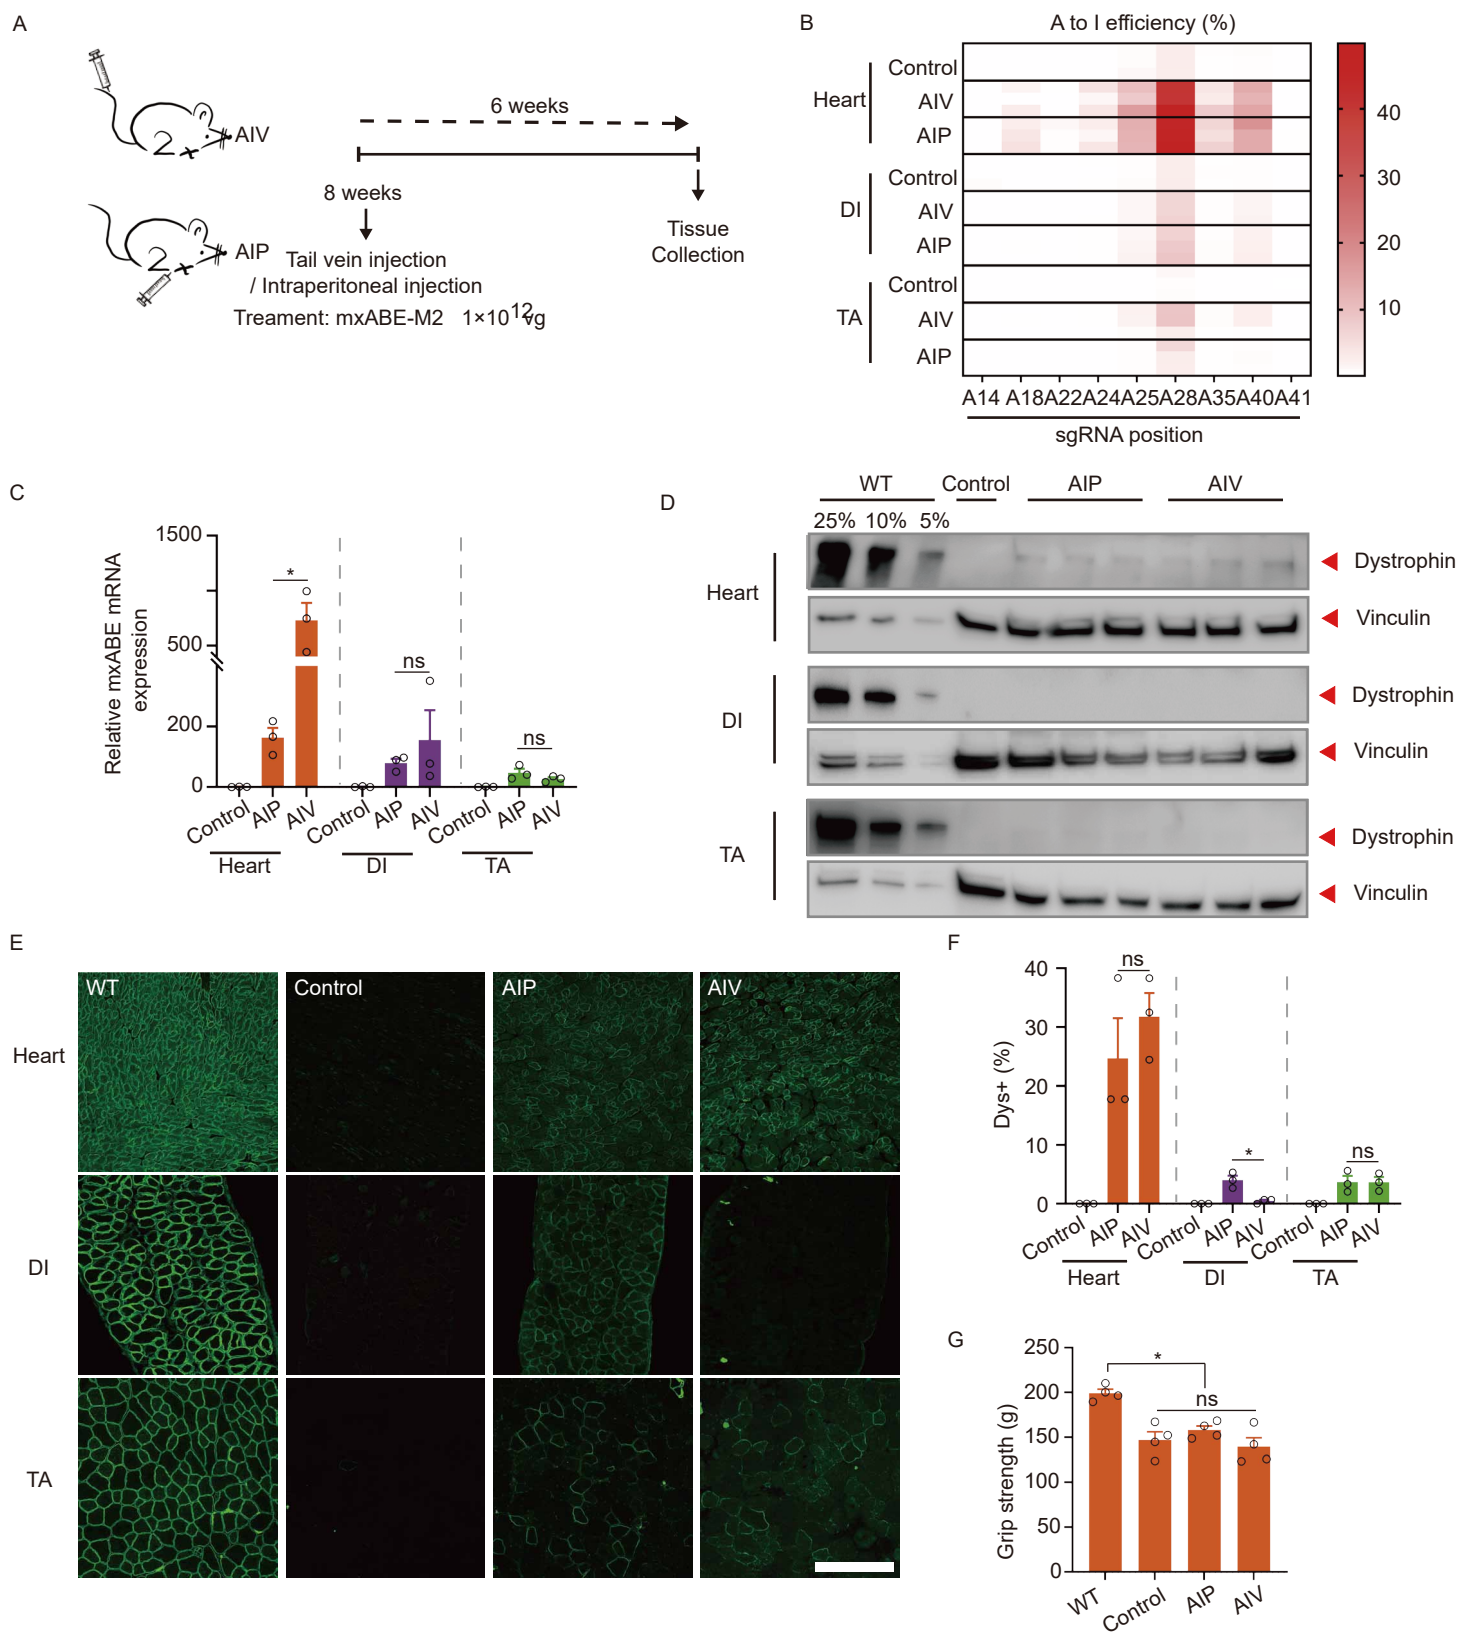

2192 **Figure S23. Systemic delivery of AAV-mxABE rescued dystrophin**  
2193 **deficiency in adult DMD<sup>E30mut</sup> mice.**

2194 A. Experimental design for mxABE administration and therapeutic analysis in  
2195 adult DMD<sup>E30mut</sup> mice. Both intravenous (AIV group) and intraperitoneal (AIP  
2196 group) injection of AAV-mxABE were evaluated. B. Heatmap shows base  
2197 editing rate in heart, DI, and TA muscles (n=3). C. mxABE expression level in  
2198 heart, DI, and TA muscles. D. Dystrophin restoration level analyzed by western  
2199 blot in heart, DI, and TA muscles of treated and untreated mice. E. Tissue  
2200 section immunostaining for dystrophin in heart, DI, and TA muscles of treated  
2201 and untreated mice. Scale bar, 200  $\mu$ m. F. Quantification of Dys+  
2202 immunostaining in (E) (n=3). G. Forelimb grip strength was measured in WT,  
2203 DMD<sup>E30mut</sup> mice, and DMD<sup>E30mut</sup> mice treated with AAV9-M2 (n=4).  
2204 Significance is indicated by asterisk ( $P < 0.05$ ). NS represents not statistically  
2205 significant using unpaired two-tailed Student's t test.

2206  
2207  
2208  
2209  
2210  
2211  
2212  
2213  
2214  
2215  
2216  
2217  
2218  
2219  
2220  
2221  
2222  
2223  
2224  
2225  
2226  
2227  
2228  
2229  
2230  
2231  
2232  
2233  
2234  
2235



Figure S24

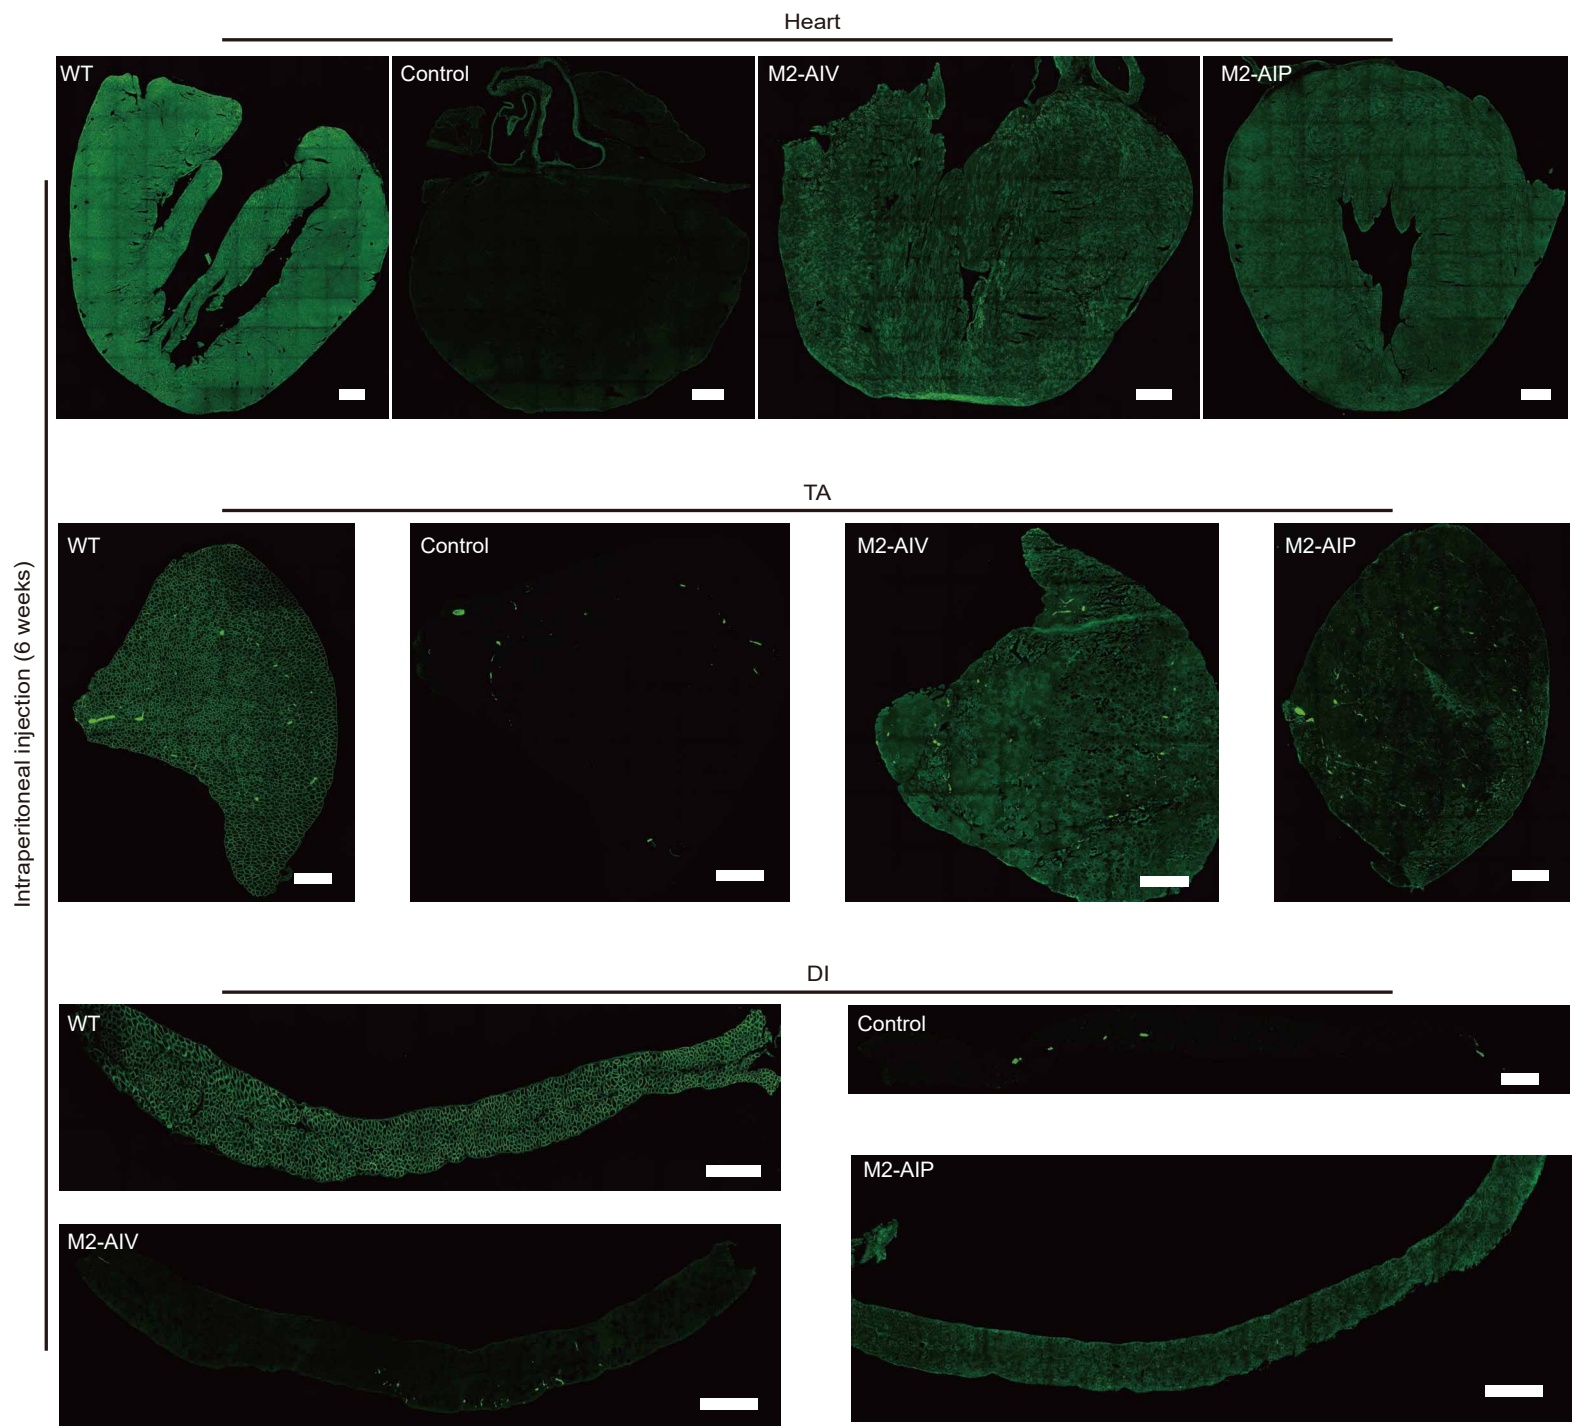

2236 **Figure S24. Immunostaining of dystrophin in adult DMD<sup>E30mut</sup> mice 6**  
2237 **weeks after systemic injection of AAV-mxABE.**

2238 Scale bar, 500  $\mu$ m.

2239  
2240  
2241  
2242  
2243  
2244  
2245  
2246  
2247  
2248  
2249  
2250  
2251  
2252  
2253  
2254  
2255  
2256  
2257  
2258  
2259  
2260  
2261  
2262  
2263  
2264  
2265  
2266  
2267  
2268  
2269  
2270  
2271  
2272  
2273  
2274  
2275  
2276  
2277  
2278  
2279

**Supplementary Table S1: Target sgRNA and primer sequence.**

| Experiment                                       | Primer name                  | Primer sequence (5'-3')                            |
|--------------------------------------------------|------------------------------|----------------------------------------------------|
| sgRNA for generation DMD <sup>E30mut</sup> model | DMD-T7sgRNA1                 | CTTCTTCTATTTAGGCTGTG                               |
|                                                  | DMD-T7sgRNA2                 | AGCTTATATCACTGACAAGG                               |
| Genotyping of DMD <sup>E30mut</sup> mice         | DMD <sup>E30mut</sup> -2333F | ATTCATATAGGGCTTCAGTTCC                             |
|                                                  | DMD <sup>E30mut</sup> -2333R | CATCTGTTTTAATAGTGTGCAT                             |
| RT-PCR primer flanking exon 30                   | RT-DMD-358F                  | AATCAGATTCGTCTATTGGCACA                            |
|                                                  | RT-DMD-358R                  | CCCTTTGGTTGGCATCCTT                                |
| RNA base editing sgRNA for exon 30               | 30nt-g1                      | GCTGCCAACCACCTTGCAATGAATGTGAGG                     |
|                                                  | 30nt-g2                      | AGCTGCCAACCACCTTGCAATGAATGTGAG                     |
|                                                  | 30nt-g3                      | TGCAATATAAGCTGCCAACCACCTTGCAAT                     |
|                                                  | 30nt-g4                      | CTGCAATATAAGCTGCCAACCACCTTGCAA                     |
|                                                  | 30nt-g5                      | AAGCTGCCAACCACCTTGCAATGAATGTGA                     |
|                                                  | 30nt-g6                      | TAAGCTGCCAACCACCTTGCAATGAATGTG                     |
|                                                  | 30nt-g7                      | ATAAGCTGCCAACCACCTTGCAATGAATGT                     |
|                                                  | 30nt-g8                      | TATAAGCTGCCAACCACCTTGCAATGAATG                     |
|                                                  | 30nt-g9                      | ATATAAGCTGCCAACCACCTTGCAATGAAT                     |
|                                                  | 30nt-g10                     | AATATAAGCTGCCAACCACCTTGCAATGAA                     |
|                                                  | 30nt-g11                     | CAATATAAGCTGCCAACCACCTTGCAATGA                     |
|                                                  | 30nt-g12                     | GCAATATAAGCTGCCAACCACCTTGCAATG                     |
|                                                  | 50nt-g1                      | TGCAATATAAGCTGCCAACCACCTTGCAATGAATGTGAGGGACTCCTGGA |
|                                                  | 50nt-g2                      | CTGCAATATAAGCTGCCAACCACCTTGCAATGAATGTGAGGGACTCCTGG |
|                                                  | 50nt-g3                      | CCACCTTGCTGCAATATAAGCTGCCAACCACCTTGCAATGAATGTGAGG  |
|                                                  | 50nt-g4                      | TCCACCTTGCTGCAATATAAGCTGCCAACCACCTTGCAATGAATGTGAG  |
|                                                  | 50nt-g5                      | TCTGCAATATAAGCTGCCAACCACCTTGCAATGAATGTGAGGGACTCCTG |
|                                                  | 50nt-g6                      | GTCTGCAATATAAGCTGCCAACCACCTTGCAATGAATGTGAGGGACTCCT |
|                                                  | 50nt-g7                      | TGTCTGCAATATAAGCTGCCAACCACCTTGCAATGAATGTGAGGGACTCC |

|                                       |             |                                                    |
|---------------------------------------|-------------|----------------------------------------------------|
|                                       | 50nt-g8     | TTGTCTGCAATATAAGCTGCCAACCCTTGTCAATGAATGTGAGGGACTC  |
|                                       | 50nt-g9     | CTTGTCTGCAATATAAGCTGCCAACCCTTGTCAATGAATGTGAGGGACT  |
|                                       | 50nt-g10    | CCTTGTCTGCAATATAAGCTGCCAACCCTTGTCAATGAATGTGAGGGAC  |
|                                       | 50nt-g11    | ACCTTGTCTGCAATATAAGCTGCCAACCCTTGTCAATGAATGTGAGGGA  |
|                                       | 50nt-g12    | CACCTTGTCTGCAATATAAGCTGCCAACCCTTGTCAATGAATGTGAGGG  |
| RT-PCR primer for                     | RT-rep765F  | CCACAACGAGGACTACACCA                               |
| Reporter                              | RT-rep765R  | TCCTTGAAGTCGATGCCCTT                               |
| qPCR primer                           | GAPDH-119F  | TCAACGACCCCTTCATTGACC                              |
|                                       | GAPDH-119R  | CTTCCCGTTGATGACAAGCTTC                             |
|                                       | Cas13X-140F | GCCATGCAGAAATAATATCTCGG                            |
|                                       | Cas13X-140R | CATTCTCCTTCAGCCTAAACCC                             |
| RNA base editing<br>sgRNA for exon 23 | 50nt-g1     | CTGAGATAGTATAGGCCACTccATTGCTCTTGCAGAGAACTTTGTAAAGC |
|                                       | 50nt-g2     | GCTGAGATAGTATAGGCCACTCCATTGCTCTTGCAGAGAACTTTGTAAAG |
|                                       | 50nt-g3     | TGCTGAGATAGTATAGGCCACTCCATTGCTCTTGCAGAGAACTTTGTAAA |
|                                       | 50nt-g4     | GTGCTGAGATAGTATAGGCCACTCCATTGCTCTTGCAGAGAACTTTGTAA |
|                                       | 50nt-g5     | GGTGCTGAGATAGTATAGGCCACTCCATTGCTCTTGCAGAGAACTTTGTA |
|                                       | 50nt-g6     | TGGTGCTGAGATAGTATAGGCCACTCCATTGCTCTTGCAGAGAACTTTGT |
|                                       | 50nt-g7     | GTGGTGCTGAGATAGTATAGGCCACTCCATTGCTCTTGCAGAGAACTTTG |
|                                       | 50nt-g8     | CACAGTGGTGCTGAGATAGTATAGGCCACTCCATTGCTCTTGCAGAGAAC |
|                                       | 50nt-g9     | TCACAGTGGTGCTGAGATAGTATAGGCCACTCCATTGCTCTTGCAGAGAA |
|                                       | 50nt-g10    | AGTGGTGCTGAGATAGTATAGGCCACTCCATTGCTCTTGCAGAGAACTTT |
|                                       | 50nt-g11    | CAGTGGTGCTGAGATAGTATAGGCCACTCCATTGCTCTTGCAGAGAACTT |
|                                       | 50nt-g12    | ACAGTGGTGCTGAGATAGTATAGGCCACTCCATTGCTCTTGCAGAGAACT |
|                                       | 30nt-g1     | TAGTATAGGCCACTCCATTGCTCTTGCAGA                     |
|                                       | 30nt-g2     | ATAGTATAGGCCACTCCATTGCTCTTGCAG                     |
|                                       | 30nt-g3     | GATAGTATAGGCCACTCCATTGCTCTTGCAG                    |
|                                       | 30nt-g4     | AGATAGTATAGGCCACTCCATTGCTCTTGC                     |
|                                       | 30nt-g5     | GAGATAGTATAGGCCACTCCATTGCTCTTGC                    |
|                                       | 30nt-g6     | TGAGATAGTATAGGCCACTCCATTGCTCTTGC                   |

|                                       |          |                                                    |
|---------------------------------------|----------|----------------------------------------------------|
|                                       | 30nt-g7  | CTGAGATAGTATAGGCCACTCCATTGCTCT                     |
|                                       | 30nt-g8  | GCTGAGATAGTATAGGCCACTCCATTGCTC                     |
|                                       | 30nt-g9  | TGCTGAGATAGTATAGGCCACTCCATTGCT                     |
|                                       | 30nt-g10 | GTGCTGAGATAGTATAGGCCACTCCATTGC                     |
|                                       | 30nt-g11 | GGTGCTGAGATAGTATAGGCCACTCCATTG                     |
|                                       | 30nt-g12 | AGTATAGGCCACTCCATTGCTCTTGCAGAG                     |
|                                       | 30nt-g13 | TAGGCCACTCCATTGCTCTTGCAGAGAACT                     |
|                                       | 30nt-g14 | ATAGGCCACTCCATTGCTCTTGCAGAGAAC                     |
|                                       | 30nt-g15 | TATAGGCCACTCCATTGCTCTTGCAGAGAA                     |
|                                       | 30nt-g16 | GTATAGGCCACTCCATTGCTCTTGCAGAGA                     |
| RNA base editing<br>sgRNA for exon 54 | 50nt-g1  | TGTAATTCATACCTTTTATGAATGCTTCTCCAAGAGGCATTGATATTCTC |
|                                       | 50nt-g2  | GTAATTCATACCTTTTATGAATGCTTCTCCAAGAGGCATTGATATTCTCT |
|                                       | 50nt-g3  | CATACCTTTTATGAATGCTTCTCCAAGAGGCATTGATATTCTCTGTTATC |
|                                       | 50nt-g4  | TCATACCTTTTATGAATGCTTCTCCAAGAGGCATTGATATTCTCTGTTAT |
|                                       | 50nt-g5  | TTCATACCTTTTATGAATGCTTCTCCAAGAGGCATTGATATTCTCTGTTA |
|                                       | 50nt-g6  | ATTCATACCTTTTATGAATGCTTCTCCAAGAGGCATTGATATTCTCTGTT |
|                                       | 50nt-g7  | AATTCATACCTTTTATGAATGCTTCTCCAAGAGGCATTGATATTCTCTGT |
|                                       | 50nt-g8  | TAATTCATACCTTTTATGAATGCTTCTCCAAGAGGCATTGATATTCTCTG |
|                                       | 50nt-g9  | ATACCTTTTATGAATGCTTCTCCAAGAGGCATTGATATTCTCTGTTATCA |
|                                       | 50nt-g10 | TACCTTTTATGAATGCTTCTCCAAGAGGCATTGATATTCTCTGTTATCAT |
|                                       | 50nt-g11 | ACCTTTTATGAATGCTTCTCCAAGAGGCATTGATATTCTCTGTTATCATG |
|                                       | 50nt-g12 | CCTTTTATGAATGCTTCTCCAAGAGGCATTGATATTCTCTGTTATCATGT |
|                                       | 30nt-g1  | CATACCTTTTATGAATGCTTCTCCAAGAGG                     |
|                                       | 30nt-g2  | TCATACCTTTTATGAATGCTTCTCCAAGAG                     |
|                                       | 30nt-g3  | TTCATACCTTTTATGAATGCTTCTCCAAGA                     |
|                                       | 30nt-g4  | ATACCTTTTATGAATGCTTCTCCAAGAGGC                     |
|                                       | 30nt-g5  | TACCTTTTATGAATGCTTCTCCAAGAGGCA                     |
|                                       | 30nt-g6  | ACCTTTTATGAATGCTTCTCCAAGAGGCAT                     |
|                                       | 30nt-g7  | TCTCCAAGAGGCATTGATATTCTCTGTTAT                     |

|          |                                |
|----------|--------------------------------|
| 30nt-g8  | TTCTCCAAGAGGCATTGATATTCTCTGTTA |
| 30nt-g9  | TATGAATGCTTCTCCAAGAGGCATTGATAT |
| 30nt-g10 | TTATGAATGCTTCTCCAAGAGGCATTGATA |
| 30nt-g11 | TTTATGAATGCTTCTCCAAGAGGCATTGAT |
| 30nt-g12 | TTTTATGAATGCTTCTCCAAGAGGCATTGA |
| 30nt-g13 | CTTTTATGAATGCTTCTCCAAGAGGCATTG |
| 30nt-g14 | CCTTTTATGAATGCTTCTCCAAGAGGCATT |
| 30nt-g15 | CTTCTCCAAGAGGCATTGATATTCTCTGTT |
| 30nt-g16 | GCTTCTCCAAGAGGCATTGATATTCTCTGT |
| 30nt-g17 | TGCTTCTCCAAGAGGCATTGATATTCTCTG |
| 30nt-g18 | AATGCTTCTCCAAGAGGCATTGATATTCTC |
| 30nt-g19 | GAATGCTTCTCCAAGAGGCATTGATATTCT |
| 30nt-g20 | TGAATGCTTCTCCAAGAGGCATTGATATTC |
| 30nt-g21 | ATGAATGCTTCTCCAAGAGGCATTGATATT |
| 30nt-g22 | ATGCTTCTCCAAGAGGCATTGATATTCTCT |

2281  
2282  
2283  
2284  
2285  
2286  
2287  
2288  
2289  
2290  
2291  
2292  
2293  
2294  
2295  
2296  
2297  
2298  
2299  
2300  
2301

2302 **Supplemental sequences AAV constructs' sequences of C1 to C4, E1 to**  
2303 **E4 and M1 to M3**

2304 C1 to C4 AAV constructs are CBh-driven mxABE. CBh promoter sequence is  
2305 highlighted in red

2306 E1 to E4 AAV constructs are EFS-driven mxABE. EFS promoter sequence is  
2307 highlighted in green

2308 M1 to M3 AAV constructs are MHCK7-driven mxABE. MHCK7 promoter  
2309 sequence is highlighted in blue

2310

2311

2312 >C1

2313 CCTGCAGGCAGCTGCGCGCTCGCTCGCTCACTGAGGCCGCCCGGGCG  
2314 TCGGGCGACCTTTGGTCGCCCCGGCCTCAGTGAGCGAGCGAGCGCGCA  
2315 GAGAGGGAGTGGCCAACCTCCATCACTAGGGGTTCTGCGGCCTCTAGAg  
2316 gagggcctattcccatgattcctcatattgcatatacgatacaaggctgtagagagataattggaattaatt  
2317 tgactgtaaacacaaagatattagtaaaaaaacgtgacgtagaaagtaataatttcttgggtagttgacgttt  
2318 taaaattatgttttaaaatggactatcatatgcttaccgtaactgaaagtatttcgatttcttggctttatatacttG  
2319 TGGAAAGGACGAAACACCGGCTGGAGCAGCCCCCGATTTGTGGGGTGA  
2320 TTACAGCgTCTGCAATATAAGCTGCCAACCACTTGTCAATGAATGTGAGGG  
2321 ACTCctGCTGGAGCAGCCCCCGATTTGTGGGGTGATTACAGCTTTTTTTTc**cg**  
2322 **ttacataacttacggtaaatggcccgctggctgaccgccaacgacccccgccattgacgtcaatagta**  
2323 **acgccaatagggactttccattgacgtcaatgggtggagtatttacggtaaaactgccactggcagtacac**  
2324 **aagtgtatcatatgccaaagtagccccctattgacgtcaatgacggtaaatggcccgctggcattGtccc**  
2325 **agtacatgaccttatgggactttcctacttggcagtacatctacgtattagtcacgctattaccatggcaggt**  
2326 **gagccccacgttctgcttactctccccatctccccccccctccccaccccccaatttgtattatttttaattat**  
2327 **ttgtgcagcgtatggggcgggggggggggggggggcgcgccaggcgggcgggcgggcgag**  
2328 **ggcgggggcgggcgaggcgagaggtgcgggcgagccaatcagagcggcgcgctccgaaagttt**  
2329 **cctttatggcgaggcgggcgggcgggcgggcctataaaaagcgaagcgcgggcgggcgggagtcgc**  
2330 **tgcgacgctgccttcgccccgtccccgctccgcccgcctcgcgcccggccccggctctgactgacc**  
2331 **gcgttactcccacaggtgagcggggcgggacggcccttctcctccgggctgtaattagctgagcaagaggtta**  
2332 **agggttaagggatggttgggtgggttattaatgttaattacctggagcacctgctgaaatcacttttttc**  
2333 **aggttGGaccggtGCCACCATGGCCCCAAGAAGAAGaGGAAGGTGCTGAGC**  
2334 ATGTACTGCCTGAAGGACAGCAGATTCACCAAGGCCTGGGATAAGCGGG  
2335 TGCTGCTGTTTCAGAGACATCCTGGCCCAGCTGGGAAGAATCCCCGCCGA  
2336 GGCCTACGAGTACTACCACGGCGAGCAGGGTGATAAGAAGAGAGCTAAC  
2337 GACAATGAGGGCACAAATCCCAAGCGGCACAAGGACAAGTTCATCGAAT  
2338 TTGCACTGCACTACCTGGAAGCCCAGCACAGCGAGATCTGCTTCGGCAG  
2339 ACGCCACATCGTGCGGGAAGAGGCCGGCGCCGGCGATGAGCACAAGAA  
2340 GCACCGGACCAAGGGAAAGGTGGTGGTGGACTTCAGCAAGAAGGACGA  
2341 GGACCAGAGCTACTATATCTCCAAGAACAACGTGATCGTGCGGATCGACA  
2342 AGAACGCCGGCCCTAGAAGCTACCGGATGGGCCTGAACGAGCTGAAGTA  
2343 CCTCGTGCTGCTGAGCCTGCAGGGGAAGGGCGACGATGCCATCGCCAA  
2344 GCTGTACAGATACAGACAGCACGTGGAGAACATCCTGGATGTGGTGAAG  
2345 GTGACCGATAAGGATAACCACGTGTTCTGCCCCGCTTCGTGCTGGAGC

2346 AGCACGGCATCGGCAGAAAGGCCTTCAAGCAGCGGATCGATGGACGGG  
2347 TGAAGCACGTGCGGGGCGTGTGGGAGAAGAAGAAGGCCGCCACCAATG  
2348 AAATGACCCTGCACGAGAAGGCCAGAGACATCCTGCAGTACGTGAACGA  
2349 AACTGCACCCGGTCCTTCAACCCTGGCGAATACAACAGACTGCTGGTG  
2350 TGCCTGGTGGGCAAGGACGTGGAGAACTTTCAGGCCGGCCTGAAGCGG  
2351 CTGCAGCTGGCCGAAAGGATCGATGGCCGGGTGTACTCCATCTTCGCC  
2352 AGACCAGCACCATCAATGAGATGCACCAGGTGGTGTGCGACCAGATCCT  
2353 GAACCGGCTGTGCAGAATCGGCGACCAGAAGCTGTACGATTACGTGGGA  
2354 CTGGGCAAGAAGGACGAAATCGACTACAAGCAGAAGGTGGCCTGGTTCA  
2355 AGGAGCACATCAGCATCCGGAGAGGATTCCTGAGAAAGAAGTTCTGGTA  
2356 CGATAGCAAGAAGGGATTCGCAAAGCTGGTGGAGGAACACCTGGAGTCC  
2357 GGCGGCGGCCAGCGCGACGTGGGCCTGGACAAGAAGTACTACCACATC  
2358 GACGCCATCGGCAGATTTCGAGGGCGCCAACCCCGCCCTGTACGAGACC  
2359 CTGGCCAGAGATCGGCTGTGCCTCATGATGGCCCAGTACTTCCTGGGCA  
2360 GCGTGAGAAAGGAACTGGGCAACAAGATTGTGTGGAGCAACGACAGCAT  
2361 CGAACTGCCTCCAAGAAGAAGCGGAAGGTGGGTGGAGGCGGAGGTTT  
2362 TGGGGGAGGAGGTAGTGGCGGTGGTGGTTCAGGAGGCGGCGGAAGCca  
2363 gctgcattaccgcaggttttagctgacgctgtctcacgcctggtcctgggtaagtttggtagctgaccgaca  
2364 acttctcctcccctcacgctcgcagaaaagtgtggtgagctcgtcatgacaacaggcacagatgtaaa  
2365 gatgccaaggtgataagtgtttctacaggaACcaaatgtattaatggtgaatacatgagtgatcgtggccttg  
2366 cattaatgactgccatgcagaaataatatctcgagatccttgctcagatttctttatacacaacttgagcttta  
2367 cttaaataacaaagatgatcaaaaaagatccatcttcagaaatcagagcgaggggggttaggctgaag  
2368 gagaatgtccagttcatctgtacatcagcacctctccctgtggagatgccagaatcttctcaccacatgagcc  
2369 aatcctggaagaaccagcagatagacacccaaatcgtaaagcaagaggacagctacggaccaaaata  
2370 gagtctggtcaggggacgattccagtgcgctccaatgcgagcatccaaacgtgggacggggtgctgcaa  
2371 ggggagcggctgctcaccatgtcctgcagtgacaagattgcacgctggaacgtggtggcatccagggat  
2372 cactgctcagcatttctgtagccatttacttctcagcatcatcctgggagcctttaccacggggaccac  
2373 cttccagggccatgtaccagcggatctccaacatagaggacctgccacctctctacacctcaacaagcct  
2374 ttgctcagtggcatcagcaatgcagaagcacggcagccagggaaggcccccaacttcagtgtcaactgg  
2375 acggtaggacgactccgctattgaggtcatcaacgccacgactgggaaggatgagctgggcccgcgctcc  
2376 cgctgtgtaagcACGCGTTGTACTGTGCTGGATGCGTGTGCACGGCAAGGT  
2377 TCCCTCCCACTTACTACGCTCCAAGATTACCAAGCCCAACGTGTACCATG  
2378 AGTCCAAGCTGGCGGCAAAGGAGTACCAGGCCGCCAAGGCCGCGTCTGT  
2379 TCACAGCCTTCATCAAGGCGGGGCTGGGGGCCTGGGTGGAGAAGCCCA  
2380 CCGAGCAGGACCAGTTCTCACTCACGtaccatacgatgtccagattacgcttatcccta  
2381 cgacgtgcctgattatgcatacccatatgatgtccccgactatgccGCGGCCGCTGATTACAAA  
2382 GACGATGACGATAAGtaaATCGAATTCGCTCGAGATAATCAACCTCTGGA  
2383 TTACAAAATTTGTGAAAGATTGACTGGTATTCTTAACTATGTTGCTCCTTTT  
2384 ACGCTATGTGGATACGCTGCTTTAATGCCTTTGTATCATGCTATTGCTTCCC  
2385 GTATGGCTTTTCATTTTCTCCTCCTTGTATAAATCCTGGTTAGTTCTTGCCAC  
2386 GGCGGAACTCATCGCCGCTGCCTTGCCCGCTGCTGGACAGGGGCTCG  
2387 GCTGTTGGGCACTGACAATTCCGTGGTGTGTTTATTTGTGAAATTTGTGATGC  
2388 TATTGCTTTATTTGTAACCATCTAGCTTTATTTGTGAAATTTGTGATGCTATT  
2389 GCTTTATTTGTAACCATTATAAGCTGCAATAAACAAGTTAACAACAACAATT



2390 GCATTCATTTTATGTTTCAGGTTTCAGGGGGAGATGTGGGAGGTTTTTTAAA  
2391 GCGGCCGCCggccgagGGCCGCAGGAACCCCTAGTGATGGAGTTGGCCA  
2392 CTCCCTCTCTGCGCGCTCGCTCGCTCACTGAGGCCGGGCGACCAAAGG  
2393 TCGCCCGACGCCCGGGCTTTGCCCGGGCGGCCTCAGTGAGCGAGCGA  
2394 GCGCGCAGCTGCCTGCAGGGGCGCCTGATGCGGTATTTTCTCCTTACGC  
2395 ATCTGTGCGGTATTTACACCCGCATACGTCAAAGCAACCATAGTACGCGC  
2396 CCTGTAGCGGCGCATTAAAGCGCGGCGGGTGTGGTGGTTACGCGCAGCG  
2397 TGACCGCTACACTTGCCAGCGCCTTAGCGCCCGCTCCTTTTCGCTTTCTTC  
2398 CTTTCTTTCTCGCCACGTTTCGCCGGCTTTCCCCGTCAAGCTCTAAATCG  
2399 GGGGCTCCCTTTAGGGTTCCGATTTAGTGCTTTACGGCACCTCGACCCCA  
2400 AAAA ACTTGATTTGGGTGATGGTTCACGTAGTGGGCCATCGCCCTGATAG  
2401 ACGTTTTTTCGCCCTTTGACGTTGGAGTCCACGTTCTTTAATAGTGGACT  
2402 CTTGTTCCAAACTGGAACAACACTCAACTCTATCTCGGGCTATTCTTTTGA  
2403 TTTATAAGGGATTTTGGCGATTTTCGGTCTATTGGTTAAAAAATGAGCTGATT  
2404 TAACAAAAATTTAACGCGAATTTTAAACAAAATATTAACGTTTACAATTTTATG  
2405 GTGCACTCTCAGTACAATCTGCTCTGATGCCGCATAGTTAAGCCAGCCCC  
2406 GACACCCGCCAACACCCGCTGACGCGCCCTGACGGGCTTGTCTGCTCC  
2407 CGGCATCCGCTTACAGACAAGCTGTGACCGTCTccgggagctgcatgtgtcagaggt  
2408 tttcaccgtcatcaccgaaacgcgcgagACGAAAGGGCCTCGTGATACGCCTATTTTTA  
2409 TAGGTTAATGTCATGATAATAATGGTTTCTTAGACGTCAGGTGGCACTTTTC  
2410 GGGGAAATGTGCGCGGAACCCCTATTTGTTTATTTTTCTAAATACATTCAA  
2411 TATGTATCCGCTCATGAGACAATAACCCTGATAAATGCTTCAATAATATTGA  
2412 AAAAGGAAGAGTATGAGTATTCAACATTTCCGTGTGCGCCCTTATTCCCTTT  
2413 TTTGCGGCATTTTGCCTTCTGTTTTTGTCAACCAGAAACGCTGGTGAA  
2414 AGTAAAAGATGCTGAAGATCAGTTGGGTGCACGAGTGGGTTACATCGAAC  
2415 TGGATCTCAACAGCGGTAAGATCCTTGAGAGTTTTCGCCCCGAAGAACGT  
2416 TTTCCAATGATGAGCACTTTTAAAGTTCTGCTATGTGGCGCGGTATTATCC  
2417 CGTATTGACGCCGGGCAAGAGCAACTCGGTCGCCGCATACACTATTCTCA  
2418 GAATGACTTGGTTGAGTACTCACCAGTCACAGAAAAGCATCTTACGGATG  
2419 GCATGACAGTAAGAGAATTATGCAGTGCTGCCATAACCATGAGTGATAACA  
2420 CTGCGGCCAACTTACTTCTGACAACGATCGGAGGACCGAAGGAGCTAAC  
2421 CGCTTTTTTGCACAACATGGGGGATCATGTAACCTCGCCTTGATCGTTGGG  
2422 AACCGGAGCTGAATGAAGCCATACCAAACGACGAGCGTGACACCACGAT  
2423 GCCTGTAGCAATGGCAACAACGTTGCGCAAACCTATTAACCTGGCGAACTAC  
2424 TTA CTCTAGCTTCCCGGCAACAATTAAGACTGGATGGAGGCGGATAAA  
2425 GTTGCAGGACCACTTCTGCGCTCGGCCCTTCCGGCTGGCTGGTTTATTG  
2426 CTGATAAATCTGGAGCCGGTGAGCGTGGAAGCCGCGGTATCATTGCAGC  
2427 ACTGGGGCCAGATGGTAAGCCCTCCCGTATCGTAGTTATCTACACGACGG  
2428 GGAGTCAGGCAACTATGGATGAACGAAATAGACAGATCGCTGAGATAGGT  
2429 GCCTCACTGATTAAGCATTGGTAACTGTCAGACCAAGTTTACTCATATATAC  
2430 TTTAGATTGATTTAAACTTTCATTTTTAATTTAAAGGATCTAGGTGAAGATC  
2431 CTTTTTGATAATCTCATGACCAAATCCCTTAACGTGAGTTTTTCGTTCCACT  
2432 GAGCGTCAGACCCCGTAGAAAAGATCAAAGGATCTTCTTGAGATCCTTTT  
2433 TTTCTGCGCGTAATCTGCTGCTTGCAAACAAAAAACACCCGCTACCAGC

2434 GGTGGTTTGTGGCCGGATCAAGAGCTACCAACTCTTTTTCCGAAGGTAA  
2435 CTGGCTTCAGCAGAGCGCAGATACCAAATACTGTTCTTCTAGTGTAGCCG  
2436 TAGTTAGGCCACCACTTCAAGAACTCTGTAGCACCGCCTACATACCTCGC  
2437 TCTGCTAATCCTGTTACCAGTGGCTGCTGCCAGTGGCGATAAGTCGTGTC  
2438 TTACCGGGTTGACTCAAGACGATAGTTACCGGATAAGGCGCAGCGGTC  
2439 GGGCTGAACGGGGGGTTCGTGCACACAGCCAGCTTGGAGCGAACGAC  
2440 CTACACCGAACTGAGATACCTACAGCGTGAGCTATGAGAAAGCGCCACG  
2441 CTTCCCGAAGGGAGAAAGGCGGACAGGTATCCGGTAAGCGGCAGGGTC  
2442 GGAACAGGAGAGCGCACGAGGGAGCTTCCAGGGGGAAACGCCTGGTAT  
2443 CTTTATAGTCCTGTCGGGTTTCGCCACCTCTGACTTGAGCGTCGATTTTT  
2444 GTGATGCTCGTCAGGGGGGGCGGAGCCTATGGAAAACGCCAGCAACGC  
2445 GGCCTTTTTACGGTTCCTGGCCTTTTGCTGGCCTTTTGCTCACATGT

2446

2447 >C2

2448 CCTGCAGGCAGCTGCGCGCTCGCTCGCTCACTGAGGCCGCCCGGGCG  
2449 TCGGGCGACCTTTGGTCGCCCGGCCTCAGTGAGCGAGCGAGCGCGCA  
2450 GAGAGGGAGTGGCCAACCTCCATCACTAGGGGTTCTGCGGCCTCTAGAg  
2451 gagggcctattcccatgattcctcatattgcatatacgatacaaggctgtagagagataattggaattaatt  
2452 tgactgtaaacacaaagatattagtagcaaaaatacgtgacgtagaaaagtaataatttctgggtagttgagttt  
2453 taaaattatgttttaaaatggactatcatatgcttaccgtaactgaaagtattcgatttctggctttatatatcttG  
2454 TGGAAAGGACGAAACACCGgCTGGAGCAGCCCCCGATTTGTGGGGTGAT  
2455 TACAGCGTCTGCAATATAAGCTGCCAACCACTTGTCAATGAATGTGAGGG  
2456 ACTCCTGCTGGAGCAGCCCCGATTTGTGGGGTGATTACAGCTTTTTTTcc  
2457 gttacataacttacggtaaattggcccgcctggctgaccgccaacgacccccgccattgacgtcaatagt  
2458 aacgccaatagggactttccattgacgtcaatgggtggagtatttacggtaaactgccacttggcagtacat  
2459 caagtgtatcatatgccaagtacgccccctattgacgtcaatgacggtaaattggcccgcctggcattGtgcc  
2460 cagtacatgacctatgggactttcctacttggcagtacatctacgtattagtcacgctattaccatggtcgagg  
2461 tgagccccacgttctgcttactctccccatctccccccccctccccaccccaatttggattttttttaatta  
2462 ttttggcagcgatggggcgggggggggggggggcgcgccagggcgggcgggcgag  
2463 gggcgggcgggcgaggcgagaggtgcggcggcagccaatcagagcggcgctccgaaagtt  
2464 cctttatggcgaggcgggcgggcgggccataaaaagcgaagcgcggcgggcgaggcgc  
2465 tgcgacgctgccttcgccccgtccccgctccgcccgcctcgcgcccccggctctgactgacc  
2466 gcgftactcccacaggtgagcgggaggcagggccttctcctccgggctgtaattagctgagcaagaggta  
2467 aggtttaagggatggttgggtgggtattaatgtttaattacctggagcacctgaaatcacttttttc  
2468 aggttGGaccggtGCCACCATGGCCCCAAGAAGAAGaGGAAGGTGCTGAGC  
2469 ATGTACTGCCTGAAGGACAGCAGATTCACCAAGGCCTGGGATAAGCGGG  
2470 TGCTGCTGTTACAGACATCCTGGCCCAGCTGGGAAGAATCCCCGCCGA  
2471 GGCCTACGAGTACTACCACGGCGAGCAGGGTGATAAGAAGAGAGCTAAC  
2472 GACAATGAGGGCACAAATCCCAAGCGGCACAAGGACAAGTTCATCGAAT  
2473 TTGCACTGCACTACCTGGAAGCCCAGCACAGCGAGATCTGCTTCGGCAG  
2474 ACGCCACATCGTGCGGGAAGAGGCCGGCGCCGGCGATGAGCACAAAGAA  
2475 GCACCGGACCAAGGGAAAGGTGGTGGTGGACTTCAGCAAGAAGGACGA  
2476 GGACCAGAGCTACTATATCTCCAAGAACAACGTGATCGTGCGGATCGACA  
2477 AGAACGCCGGCCCTAGAAGCTACCGGATGGGCCTGAACGAGCTGAAGTA

2478 CCTCGTGCTGCTGAGCCTGCAGGGGAAGGGCGACGATGCCATCGCCAA  
2479 GCTGTACAGATACAGACAGCACGTGGAGAACATCCTGGATGTGGTGAAG  
2480 GTGACCGATAAGGATAACCACGTGTTCTGCCCCGCTTCGTGCTGGAGC  
2481 AGCACGGCATCGGCAGAAAGGCCTTCAAGCAGCGGATCGATGGACGGG  
2482 TGAAGCACGTGCGGGGCGTGTGGGAGAAGAAGAAGGCCGCCACCAATG  
2483 AAATGACCCTGCACGAGAAGGCCAGAGACATCCTGCAGTACGTGAACGA  
2484 AACTGCACCCGGTCCTTCAACCCTGGCGAATACAACAGACTGCTGGTG  
2485 TGCCTGGTGGGCAAGGACGTGGAGAACTTTCAGGCCGGCCTGAAGCGG  
2486 CTGCAGCTGGCCGAAAGGATCGATGGCCGGGTGTACTCCATCTTCGCC  
2487 AGACCAGCACCATCAATGAGATGCACCAGGTGGTGTGCGACCAGATCCT  
2488 GAACCGGCTGTGCAGAATCGGCGACCAGAAGCTGTACGATTACGTGGGA  
2489 CTGGGCAAGAAGGACGAAATCGACTACAAGCAGAAGGTGGCCTGGTTCA  
2490 AGGAGCACATCAGCATCCGGAGAGGATTCCTGAGAAAGAAGTTCTGGTA  
2491 CGATAGCAAGAAGGGATTCGCAAAGCTGGTGGAGGAACACCTGGAGTCC  
2492 GGCGGCGGCCAGCGCGACGTGGGCCTGGACAAGAAGTACTACCACATC  
2493 GACGCCATCGGCAGATTTCGAGGGCGCCAACCCCGCCCTGTACGAGACC  
2494 CTGGCCAGAGATCGGCTGTGCCTCATGATGGCCCAGTACTTCCTGGGCA  
2495 GCGTGAGAAAGGAACTGGGCAACAAGATTGTGTGGAGCAACGACAGCAT  
2496 CGAACTGCCTCCCAAGAAGAAGCGGAAGGTGGGTGGAGGCGGAGGTTT  
2497 TGGGGGAGGAGGTAGTGGCGGTGGTGGTTCAGGAGGCGGCGGAAGCca  
2498 gctgcatttaccgcaggttttagctgacgctgtctcacgcctggtcctgggtaagtttggtgacctgaccgaca  
2499 acttctcctcccctcacgctcgcagaaaagtgtggtgagtcgtcatgacaacaggcacagatgttaa  
2500 gatgccaaggtgataagtgtttctacaggaACcaaatgtattaatggtgaatacatgagtgatcgtggccttg  
2501 cattaaatgactgcatcagaaaataatctcggagatccttctcagatttctttatacacaacttgagcttta  
2502 cttaaataacaaagatgatcaaaaaagatccatcttcagaaatcagagcgaggggggttaggctgaag  
2503 gagaatgtccagtttcatctgtacatcagcacctctcccctgtggagatgccagaatcttctcaccatgagcc  
2504 aatcctggaagaaccagcagatagacacccaaatcgtaaagcaagaggacagctacggaccaaata  
2505 gagtctggtcaggggacgattccagtgcgctccaatgcgagcatccaaacgtgggacggggtgctgcaa  
2506 ggggagcggctgtcaccatgtctcagtgacaagattgcacgctggaacgtggtggcatccagggat  
2507 cactgtcagcatttctgtagccatttacttctcagatcatctctgggagccttaccacggggaccac  
2508 ctttccagggccatgtaccagcggatctccaacatagaggacctgccacctctctacacctcaacaagcct  
2509 ttgctcagtggtatcagcaatgcagaagcagcagccaggggaaggcccccaacttcagtgtcaactgg  
2510 acggtaggcgactcccgtattgaggtcatcaacgccacgactgggaaggatgagctgggcccgcgctcc  
2511 cgcctgttaagcACGCGTTGTAAGTGTGCTGGATGCGTGTGCACGGCAAGGT  
2512 TCCCTCCCCTTACTACGCTCCAAGATTACCAAGCCCAACGTGTACCATG  
2513 AGTCCAAGCTGGCGGCAAAGGAGTACCAGGCCGCAAGGCGCGTCTGT  
2514 TCACAGCCTTCATCAAGGCGGGGCTGGGGGCCTGGGTGGAGAAGCCCA  
2515 CCGAGCAGGACCAGTTCTCACTCACGCCCAAGAAGAAGaGGAAGGTGG  
2516 GATCctaccatacagatgttccagattacgcttatccctacgacgtgcctgattatgcatacccatatgatgt  
2517 ccccgactatgccGCGGCCGCTGATTACAAAGACGATGACGATAAGtaaGTCGA  
2518 CAACTTGTTTATTGCAGCTTATAATGGTTACAAATAAAGCAATAGCATCACA  
2519 AATTTACAAATAAAGCATTTTTTTTCACTGCATTCTAGTTGTGGTTTTGTCCA  
2520 AACTCATCAATGTATCTTATCATGTCTGGATCGCggccgagGGCCGCAGGAA  
2521 CCCCTAGTGATGGAGTTGGCCACTCCCTCTCTGCGCGCTCGCTCGCTCA

2522 CTGAGGCCGGGCGACCAAAGGTCGCCCGACGCCCGGGCTTTGCCCGG  
2523 GCGGCCTCAGTGAGCGAGCGAGCGCGCAGCTGCCTGCAGGGGCGCCT  
2524 GATGCGGTATTTTCTCCTTACGCATCTGTGCGGTATTTACACCCGCATACG  
2525 TCAAAGCAACCATAGTACGCGCCCTGTAGCGGCGCATTAAAGCGCGGCGG  
2526 GTGTGGTGGTTACGCGCAGCGTGACCGCTACACTTGCCAGCGCCTTAGC  
2527 GCCCGCTCCTTTGCTTTTCTCCCTTCTCTCGCCACGTTCCGCCGGCT  
2528 TTCCCGTCAAGCTCTAAATCGGGGGCTCCCTTTAGGGTTCCGATTTAGT  
2529 GCTTTACGGCACCTCGACCCCAAAAACTTGATTTGGGTGATGGTTCACG  
2530 TAGTGGGCCATCGCCCTGATAGACGGTTTTTCGCCCTTTGACGTTGGAGT  
2531 CCACGTTCTTTAATAGTGGACTCTTGTTCCAAACTGGAACAACACTCAACT  
2532 CTATCTCGGGCTATTCTTTTGATTTATAAGGGATTTTGCCGATTTGCGTCTA  
2533 TTGGTTAAAAAATGAGCTGATTTAACAAAAATTTAACGCGAATTTTAACAAA  
2534 ATATTAACGTTTACAATTTTATGGTGCACCTCTCAGTACAATCTGCTCTGATG  
2535 CCGCATAGTTAAGCCAGCCCCGACACCCGCCAACACCCGCTGACGCGC  
2536 CCTGACGGGCTTGTCTGCTCCCGGCATCCGCTTACAGACAAGCTGTGAC  
2537 CGTCTccgggagctgcatgtgcagaggtttcaccgtcatcaccgaaacgcgcgagACGAAAGG  
2538 GCCTCGTGATACGCCTATTTTTATAGGTTAATGTCATGATAATAATGGTTTCT  
2539 TAGACGTCAGGTGGCACTTTTCGGGGAAATGTGCGCGGAACCCCTATTT  
2540 GTTTATTTTTCTAAATACATTCAAATATGTATCCGCTCATGAGACAATAACCC  
2541 TGATAAATGCTTCAATAATATTGAAAAAGGAAGAGTATGAGTATTCAACATT  
2542 TCCGTGTCGCCCTTATTCCCTTTTTTGCGGCATTTTGCCTTCTGTTTTTG  
2543 CTCACCCAGAAACGCTGGTGAAAGTAAAAGATGCTGAAGATCAGTTGGG  
2544 TGCACGAGTGGGTTACATCGAACTGGATCTCAACAGCGGTAAGATCCTTG  
2545 AGAGTTTTTCGCCCGAAGAACGTTTTCCAATGATGAGCACTTTTAAAGTT  
2546 CTGCTATGTGGCGCGGTATTATCCCGTATTGACGCCGGGCAAGAGCAACT  
2547 CGGTCCCGCATACTATTCTCAGAATGACTTGGTTGAGTACTCACCAG  
2548 TCACAGAAAAGCATCTTACGGATGGCATGACAGTAAGAGAATTATGCAGT  
2549 GCTGCCATAACCATGAGTGATAAACTGCGGCCAACTTACTTCTGACAAC  
2550 GATCGGAGGACCGAAGGAGCTAACCGCTTTTTTGCACAACATGGGGGAT  
2551 CATGTAACCTCGCCTTGATCGTTGGGAACCGGAGCTGAATGAAGCCATACC  
2552 AAACGACGAGCGTGACACCACGATGCCTGTAGCAATGGCAACAACGTTG  
2553 CGCAAACCTATTAACCTGGCGAACTACTTACTCTAGCTTCCCGGCAACAATTA  
2554 ATAGACTGGATGGAGGCGGATAAAGTTGCAGGACCACTTCTGCGCTCGG  
2555 CCCTTCCGGCTGGCTGGTTTTATTGCTGATAAATCTGGAGCCGGTGAGCGT  
2556 GGAAGCCGCGGTATCATTGCAGCACTGGGGCCAGATGGTAAGCCCTCCC  
2557 GTATCGTAGTTATCTACACGACGGGGAGTCAGGCAACTATGGATGAACGA  
2558 AATAGACAGATCGCTGAGATAGGTGCCTCACTGATTAAGCATTGGTAACTG  
2559 TCAGACCAAGTTTACTCATATATACTTTAGATTGATTTAAACTTCATTTTTAA  
2560 TTTAAAAGGATCTAGGTGAAGATCCTTTTTGATAATCTCATGACCAAATCC  
2561 CTTAACGTGAGTTTTCGTTCCACTGAGCGTCAGACCCCGTAGAAAAGATC  
2562 AAAGGATCTTCTTGAGATCCTTTTTTTCTGCGCGTAATCTGCTGCTTGCAA  
2563 ACAAAAAACCACCGCTACCAGCGGTGGTTTTGTTTGCCGGATCAAGAGC  
2564 TACCAACTCTTTTTCCGAAGGTAACCTGGCTTCAGCAGAGCGCAGATACCA  
2565 AATACTGTTCTTCTAGTGTAGCCGTAGTTAGGCCACCACTTCAAGAACTCT

2566 GTAGCACCGCCTACATACCTCGCTCTGCTAATCCTGTTACCAGTGGCTGC  
2567 TGCCAGTGGCGATAAGTCGTGTCTTACCGGGTTGGACTCAAGACGATAGT  
2568 TACCGGATAAAGCGCAGCGGTTCGGGCTGAACGGGGGGTTCGTGCACAC  
2569 AGCCCAGCTTGGAGCGAACGACCTACACCGAACTGAGATACCTACAGCG  
2570 TGAGCTATGAGAAAGCGCCACGCTTCCCGAAGGGAGAAAGGCGGACAG  
2571 GTATCCGGTAAGCGGCAGGGTCGGAACAGGAGAGCGCACGAGGGAGCT  
2572 TCCAGGGGGAAACGCCTGGTATCTTTATAGTCTGTTCGGGTTTCGCCACC  
2573 TCTGACTTGAGCGTCGATTTTTGTGATGCTCGTCAGGGGGGCGGAGCCT  
2574 ATGGAAAACGCCAGCAACGCGGCCTTTTTACGGTTCCTGGCCTTTTGCT  
2575 GGCTTTTGCTCACATGT

2576

2577 >C3

2578 CCTGCAGGCAGCTGCGCGCTCGCTCGCTCACTGAGGCCGCCCGGGCG  
2579 TCGGGCGACCTTTGGTCGCCCGGCCTCAGTGAGCGAGCGAGCGCGCA  
2580 GAGAGGGAGTGGCCAACTCCATCACTAGGGGTTCTGCGGCCTCTAGAg  
2581 gagggcctattcccatgattcctcatattgcatatacgatacaaggctgtagagagataattggaattaatt  
2582 tgactgtaaacacaaagatattagtacaaaatacgtgacgtagaaagtaataatttctgggtagttgcagttt  
2583 taaattatgtttaaaatggactatcatatgcttaccgtaactgaaagtatttcgatttctggcttatatatcttG  
2584 TGGAAAGGACGAAACACCGGCTGGAGCAGCCCCGATTTGTGGGGTGA  
2585 TTACAGCGTCTGCAATATAAGCTGCCAACCCTTGTCAATGAATGTGAGG  
2586 GACTCCTGCTGGAGCAGCCCCGATTTGTGGGGTGATTACAGCTTTTTTTT  
2587 ccgttacataacttacggtaaatggcccgcctggctgaccgccaacgacccccgccattgacgtcaata  
2588 gtaacgccaatagggactttccattgacgtcaatgggtggagtatttacggtaaaactgcccaactggcagtac  
2589 atcaagtgtatcatatgccaagtacgccccctattgacgtcaatgacggtaaatggcccgcctggcattGtg  
2590 ccagttacatgaccttatgggacttctacttggcagttacatctacgtattagtcacgctattaccatggtcga  
2591 ggtgagccccacgttctgcttcactctccccatctccccccccctccccaccccccaattttgtatttttttttaa  
2592 ttattttgtgcagcgatgggggcgggggggggggggggggcgcgccaggcggggcgggggcgggggcg  
2593 aggggcggggcggggagggcgagaggtgcggcgagccaatcagagcggcgcgctccgaaag  
2594 ttcttttatggcgagggcgggcgggcgggccctataaaaagcgaagcgcgagggcggggagtc  
2595 gctgcgacgctgccttcgccccgtgccccgctccgcccgcctcgcgccgcccggcctctgactga  
2596 ccgcttactcccacaggtgagcgggagggagggccttctcctcgggctgtaattagctgagcaagag  
2597 gtaagggtttaagggatggttgggtgggtggttattaatgtttaattacctggagcacctgctgaaatcactttt  
2598 tttaggttGGaccggtGCCACCATGGCCCCAAGAAGAAGaGGAAGGTGCTGA  
2599 GCATGTACTGCCTGAAGGACAGCAGATTCACCAAGGCCTGGGATAAGCG  
2600 GGTGCTGCTGTTTACAGAGACATCCTGGCCCAGCTGGGAAGAATCCCCGCC  
2601 GAGGCCTACGAGTACTACCACGGCGAGCAGGGTGATAAGAAGAGAGCTA  
2602 ACGACAATGAGGGCACAAATCCCAAGCGGCACAAGGACAAGTTCATCGA  
2603 ATTTGCACTGCACTACCTGGAAGCCCAGCACAGCGAGATCTGCTTCGGC  
2604 AGACGCCACATCGTGCGGGAAGAGGCCGGCGCCGGCGATGAGCACAAG  
2605 AAGCACCGGACCAAGGGAAAGGTGGTGGTGGACTTCAGCAAGAAGGAC  
2606 GAGGACCAGAGCTACTATATCTCCAAGAACAACGTGATCGTGCGGATCGA  
2607 CAAGAACGCCGGCCCTAGAAGCTACCGGATGGGCCTGAACGAGCTGAA  
2608 GTACCTCGTGCTGCTGAGCCTGCAGGGGAAGGGCGACGATGCCATCGC  
2609 CAAGCTGTACAGATAACAGACAGCACGTGGAGAACATCCTGGATGTGGTG

2610 AAGGTGACCGATAAAGGATAACCACGTGTTCCCTGCCCCGCTTCGTGCTGG  
2611 AGCAGCACGGCATCGGCAGAAAGGCCTTCAAGCAGCGGATCGATGGAC  
2612 GGGTGAAGCACGTGCGGGGCGTGTGGGAGAAGAAGAAGGCCGCCACC  
2613 AATGAAATGACCCTGCACGAGAAGGCCAGAGACATCCTGCAGTACGTGA  
2614 ACGAAAACCTGCACCCGGTCCTTCAACCCTGGCGAATAACAACAGACTGCT  
2615 GGTGTGCCTGGTGGGCAAGGACGTGGAGAACTTTCAGGCCGGCCTGAA  
2616 GCGGCTGCAGCTGGCCGAAAGGATCGATGGCCGGGTGTACTCCATCTTC  
2617 GCCCAGACCAGCACCATCAATGAGATGCACCAGGTGGTGTGCGACCAGA  
2618 TCCTGAACCGGCTGTGCAGAATCGGCGACCAGAAGCTGTACGATTACGT  
2619 GGGACTGGGCAAGAAGGACGAAATCGACTACAAGCAGAAGGTGGCCTG  
2620 GTTCAAGGAGCACATCAGCATCCGGAGAGGATTCCTGAGAAAGAAGTTC  
2621 TGGTACGATAGCAAGAAGGGATTGCAAAGCTGGTGGAGGAACACCTGG  
2622 AGTCCGGCGGCGGCCAGCGCGACGTGGGCCTGGACAAGAAGTACTACC  
2623 ACATCGACGCCATCGGCAGATTCGAGGGCGCCAACCCCGCCCTGTACGA  
2624 GACCCTGGCCAGAGATCGGCTGTGCCTCATGATGGCCCAGTACTTCCTG  
2625 GGCAGCGTGAGAAAGGAACTGGGCAACAAGATTGTGTGGAGCAACGAC  
2626 AGCATCGAACTGCCTCCCAAGAAGAAGCGGAAGGTGGGTGGAGGCGGA  
2627 GGTTCTGGGGGAGGAGGTAGTGGCGGTGGTGGTTCAGGAGGCGGCGG  
2628 AAGCcagctgcatttaccgcaggttttagctgacgtgtctcacgcctggtcctgggtaagtttgggacctg  
2629 accgacaacttctctcccctcacgctcgagaaaagtgtggctggagtcgcatgacaacaggcacag  
2630 atgttaaagatgccaaaggtgataagtgtttctacaggaACcaaagtattaatggtgaatacatgagtgatc  
2631 gtggccttgcatataatgactgccatgcagaaataatatctcgagatccttgctcagatttcttatacacaac  
2632 ttgagctttacttaataacaaagatgatcaaaaaagatccatcttccagaaatcagagcgaggggggtta  
2633 ggctgaaggagaatgcccagtttcatctgtacatcagcacctctccctgtggagatgccagaatcttctcacc  
2634 acatgagccaatcctggaagaaccagcagatagacacccaaatcgtaaagcaagaggacagctacgg  
2635 accaaaatagagtctggtcaggggacgattccagtgcgctccaatgcgagcatccaaacgtgggacggg  
2636 gtgctgcaaggggagcggctgctcaccatgtcctgcagtgacaagattgcacgctggaacgtggtgggca  
2637 tccagggatcactgctcagcattttctggtggagcccatttacttctcgagcatcatcctgggcagcctttaccacg  
2638 gggaccacctttccagggccatgtaccagcggatctccaacatagaggacctgccacctcttacaccctc  
2639 aacaagcctttgctcagtggtcagcaatgcagaagcacggcagccaggggaaggcccccacttcagt  
2640 gtcaactggacggttaggcgactccgctattgaggtcatcaacgccacgactgggaaggatgagctgggccc  
2641 gcgctgcccgcctgtgtaagcACGCGTTGTAAGTGTGCTGGATGCGTGTGCACGG  
2642 CAAGGTTCCCTCCCCTACTACGCTCCAAGATTACCAAGCCCAACGTGT  
2643 ACCATGAGTCCAAGCTGGCGGCAAAGGAGTACCAGGCCGCCAAGGCGC  
2644 GTCTGTTACAGCCTTCATCAAGGCGGGGCTGGGGGCCTGGGTGGAGA  
2645 AGCCCACCGAGCAGGACCAGTTCTCACTCACGAAAAGGCCGGCGGCCA  
2646 CGAAAAGGCCGGCCAGGCCAAAAAAGAAAAAGtaccatacagatgttccagattacg  
2647 cttatccctacgacgtgcctgattatgatacccatatgatgtccccgactatgccGCGGCCGCTGAT  
2648 TACAAAGACGATGACGATAAGtaaATCGAATTCCGCTCGAGATAATCAACCT  
2649 CTGGATTACAAAATTTGTGAAAGATTGACTGGTATTCTTAACCTATGTTGCTC  
2650 CTTTTACGCTATGTGGATACGCTGCTTTAATGCCTTTGTATCATGCTATTGC  
2651 TTCCCGTATGGCTTTCATTTTCTCCTCCTTGTATAAATCCTGGTTAGTTCTT  
2652 GCCACGGCGGAACTCATCGCCGCCTGCCTTGCCCGCTGCTGGACAGGG  
2653 GCTCGGCTGTTGGGCACTGACAATTCCGTGGTGTATTATTGTGAAATTTG

2654 TGATGCTATTGCTTTATTTGTAACCATCTAGCTTTATTTGTGAAATTTGTGAT  
2655 GCTATTGCTTTATTTGTAACCATTATAAGCTGCAATAACAAGTTAACAACA  
2656 ACAATTGCATTCATTTTATGTTTTAGGTTTCAGGGGAGATGTGGGAGGTTT  
2657 TTTAAAGCGGCCGCCggccgagGGCCGCAGGAACCCCTAGTGATGGAGTT  
2658 GGCCACTCCCTCTCTGCGCGCTCGCTCGCTCACTGAGGCCGGGCGACC  
2659 AAAGGTCGCCCCGACGCCCCGGGCTTTGCCCGGGCGGCCTCAGTGAGCG  
2660 AGCGAGCGCGCAGCTGCCTGCAGGGGCGCCTGATGCGGTATTTTCTCCT  
2661 TACGCATCTGTGCGGTATTTACACCCGCATACGTCAAAGCAACCATAGTAC  
2662 GCGCCCTGTAGCGGCGCATTAAAGCGCGGCGGGTGTGGTGGTTACGCGC  
2663 AGCGTGACCGCTACACTTGCCAGCGCCTTAGCGCCCCGCTCCTTTTCGCTT  
2664 TCTTCCCTTCCCTTTCTCGCCACGTTTCGCCGGCTTTCCCCGTCAAGCTCTA  
2665 AATCGGGGGCTCCCTTTAGGGTTCCGATTTAGTGCTTTACGGCACCTCGA  
2666 CCCCAAAAACTTGATTTGGGTGATGGTTCACGTAGTGGGCCATCGCCCT  
2667 GATAGACGGTTTTTCGCCCTTTGACGTTGGAGTCCACGTTCTTTAATAGTG  
2668 GACTCTTGTTCCAAACTGGAACAACACTCAACTCTATCTCGGGCTATTCTT  
2669 TTGATTTATAAGGGATTTTGCCGATTTTCGGTCTATTGGTTAAAAAATGAGCT  
2670 GATTTAACAAAAATTTAACGCGAATTTTAACAAAAATATTAACGTTTACAATTT  
2671 TATGGTGCACCTCAGTACAATCTGCTCTGATGCCGCATAGTTAAGCCAG  
2672 CCCCAGACACCCGCCAACACCCGCTGACGCGCCCTGACGGGCTTGTCTG  
2673 CTCCCGGCATCCGCTTACAGACAAGCTGTGACCGTCTccgggagctgcatgtgc  
2674 agaggtttcaccgtcatcaccgaaacgcgagACGAAAGGGCCTCGTGATACGCCTAT  
2675 TTTTATAGGTTAATGTCATGATAATAATGGTTTCTTAGACGTCAGGTGGCAC  
2676 TTTTCGGGGAAATGTGCGCGGAACCCCTATTTGTTTATTTTTCTAAATACAT  
2677 TCAAATATGTATCCGCTCATGAGACAATAACCCTGATAAATGCTTCAATAATA  
2678 TTGAAAAAGGAAGAGTATGAGTATTCAACATTTCCGTGTCGCCCTTATTCC  
2679 CTTTTTTGCGGCATTTTGCCTTCTGTTTTTGCTCACCCAGAAACGCTGG  
2680 TGAAAGTAAAAGATGCTGAAGATCAGTTGGGTGCACGAGTGGGTACATC  
2681 GAACTGGATCTCAACAGCGGTAAGATCCTTGAGAGTTTTTCGCCCGAAG  
2682 AACGTTTTCCAATGATGAGCACTTTTAAAGTTCTGCTATGTGGCGCGGTAT  
2683 TATCCCGTATTGACGCCGGGCAAGAGCAACTCGGTCGCCGCATACACTAT  
2684 TCTCAGAATGACTTGTTGAGTACTACCAGTCACAGAAAAGCATCTTAC  
2685 GGATGGCATGACAGTAAGAGAATTATGCAGTGCTGCCATAACCATGAGTG  
2686 ATAACACTGCGGCCAACTTACTTCTGACAACGATCGGAGGACCGAAGGA  
2687 GCTAACCGCTTTTTTGCACAACATGGGGGATCATGTAACCTCGCCTTGATC  
2688 GTTGGGAACCGGAGCTGAATGAAGCCATACCAAACGACGAGCGTGACAC  
2689 CACGATGCCTGTAGCAATGGCAACAACGTTGCGCAAACCTATTAACCTGGCG  
2690 AACTACTTACTCTAGCTTCCCGGCAACAATTAATAGACTGGATGGAGGCG  
2691 GATAAAGTTGCAGGACCACTTCTGCGCTCGGCCCTTCCGGCTGGCTGGT  
2692 TTATTGCTGATAAATCTGGAGCCGGTGAGCGTGGAAGCCGCGGTATCATT  
2693 GCAGCACTGGGGCCAGATGGTAAGCCCTCCCGTATCGTAGTTATCTACAC  
2694 GACGGGGAGTCAGGCAACTATGGATGAACGAAATAGACAGATCGCTGAG  
2695 ATAGGTGCCTCACTGATTAAGCATTGGTAACTGTCAGACCAAGTTTACTCA  
2696 TATATACTTTAGATTGATTTAAACTTCATTTTTAATTTAAAGGATCTAGGTG  
2697 AAGATCCTTTTTGATAATCTCATGACCAAAAATCCCTTAACGTGAGTTTTCGT

2698 TCCACTGAGCGTCAGACCCCGTAGAAAAGATCAAAGGATCTTCTTGAGAT  
2699 CCTTTTTTTCTGCGCGTAATCTGCTGCTTGCAAACAAAAAACCACCGCTA  
2700 CCAGCGGTGGTTTGTGGCCGGATCAAGAGCTACCAACTCTTTTCCGAA  
2701 GGTAAGTGGCTTCAGCAGAGCGCAGATACCAATACTGTTCTTCTAGTGT  
2702 AGCCGTAGTTAGGCCACCACTTCAAGAACTCTGTAGCACCGCCTACATAC  
2703 CTCGCTCTGCTAATCCTGTTACCAGTGGCTGCTGCCAGTGGCGATAAGTC  
2704 GTGTCTTACCGGGTTGGAAGACGATAGTTACCGGATAAGGCGCAG  
2705 CGGTCCGGCTGAACGGGGGGTTCGTGCACACAGCCCAGCTTGGAGCGA  
2706 ACGACCTACACCGAACTGAGATACCTACAGCGTGAGCTATGAGAAAGCG  
2707 CCACGCTTCCCGAAGGGAGAAAGGCGGACAGGTATCCGGTAAGCGGCA  
2708 GGGTCCGGAACAGGAGAGCGCACGAGGGAGCTTCCAGGGGGAAACGCC  
2709 TGGTATCTTTATAGTCCTGTCGGGTTTCGCCACCTCTGACTTGAGCGTCG  
2710 ATTTTGTGATGCTCGTCAGGGGGGCGGAGCCTATGGAAAACGCCAGC  
2711 AACGCGGCCTTTTACGGTTCCTGGCCTTTTGCTGGCCTTTTGCTCACAT  
2712 GT

2713

2714 >C4

2715 CCTGCAGGCAGCTGCGCGCTCGCTCGCTCACTGAGGCCGCCCGGGCG  
2716 TCGGGCGACCTTTGGTCGCCCGGCCTCAGTGAGCGAGCGAGCGCGCA  
2717 GAGAGGGAGTGGCCAACCTCCATCACTAGGGGTTCTGCGGCCTCTAGAg  
2718 agggcctatttcccatgattcctcatatttgcataacgatacaaggctgtagagagataattggaattaattt  
2719 gactgtaaacacaaagatattagtaaaaatcgtgacgtagaaagtaataatttcttggttagttgacgtttt  
2720 aaaattatgtttaaaatggactatcatatgctaccgtaactgaaagtatttgcatttcttgctttatatacttG  
2721 TGGAAAGGACGAAACACCGGTCTGCAATATAAGCTGCCAACCCTTGTCA  
2722 ATGAATGTGAGGGACTCCTGCTGGAGCAGCCCCGATTTGTGGGGTGAT  
2723 TACAGCTTTTTTTc~~ggttacataacttacggtaaatggcccgcctggctgaccgccaacgaccccc~~  
2724 ~~gccattgacgtcaatagtaacgccaatagggactttcattgacgtcaatgggtggagtatttacggtaaac~~  
2725 ~~tgcccacttggcagtacatcaagtgtatcatatgccaagtagccccctattgacgtcaatgacggtaaatgg~~  
2726 ~~cccgcctggcattGtgcccagtagatgaccttattggactttctacttggcagtagatctacgtattagtcac~~  
2727 ~~gctattaccatggctgaggtgagccccacgttctgcttcaactctccccatctccccccccctccccaccccaat~~  
2728 ~~ttgtatttatttttaattttttgtgcagcgtggggggggggggggggggggggcgcgcccaggcgg~~  
2729 ~~ggcggggcggggcgaggggcggggcggggcgagggcgagaggtgcggcggcagccaatcagagc~~  
2730 ~~ggcgcgctccgaaagtctttatggcgagggcggcgggcgggcggccctataaaaagcgaagcgcg~~  
2731 ~~cggcggggcgggagtcgctgcgacgctgccttgcggcgctcccgctccgcccgcctcgcgccc~~  
2732 ~~gccccggctctgactgaccggttactcccacaggtgagcgggcgggacggcccttctcctccgggctga~~  
2733 ~~attagctgagcaagaggttaagggatggttgggtgggttattaatgtttaattacctggagcac~~  
2734 ~~ctgcctgaaatcactttttcag~~gttGGaccggtgccaccATGaagcggactgctgatggcagtgatttg  
2735 agtccccaaagaagaagagaaaggtgCTGAGCATGTACTGCCTGAAGGACAGCAGA  
2736 TTCACCAAGGCCTGGGATAAGCGGGTGCTGCTGTTTACAGAGACATCCTGG  
2737 CCCAGCTGGGAAGAATCCCCGCCGAGGCCTACGAGTACTACCACGGCG  
2738 AGCAGGGTGATAAGAAGAGAGCTAACGACAATGAGGGCACAAATCCCAA  
2739 GCGGCACAAGGACAAGTTCATCGAATTTGCACTGCACTACCTGGAAGCC  
2740 CAGCACAGCGAGATCTGCTTCGGCAGACGCCACATCGTGCGGGAAGAG  
2741 GCCGGCGCCGGCGATGAGCACAGAAGCACCCGGACCAAGGGAAAGGT



2742 GGTGGTGGACTTCAGCAAGAAGGACGAGGACCAGAGCTACTATATCTCC  
2743 AAGAACAACGTGATCGTGCGGATCGACAAGAACGCCGGCCCTAGAAGCT  
2744 ACCGGATGGGCTGAACGAGCTGAAGTACCTCGTGCTGCTGAGCCTGCA  
2745 GGGGAAGGGCGACGATGCCATCGCCAAGCTGTACAGATACAGACAGCAC  
2746 GTGGAGAACATCCTGGATGTGGTGAAGGTGACCGATAAGGATAACCACG  
2747 TGTTCCCTGCCCCGCTTCGTGCTGGAGCAGCACGGCATCGGCAGAAAGG  
2748 CCTTCAAGCAGCGGATCGATGGACGGGTGAAGCACGTGCGGGGCGTGT  
2749 GGGAGAAGAAGAAGGCCGCCACCAATGAAATGACCCTGCACGAGAAGG  
2750 CCAGAGACATCCTGCAGTACGTGAACGAAAACCTGCACCCGGTCCTTCAA  
2751 CCCTGGCGAATAACAACAGACTGCTGGTGTGCCTGGTGGGCAAGGACGT  
2752 GGAGAACTTTCAGGCCGGCCTGAAGCGGCTGCAGCTGGCCGAAAGGAT  
2753 CGATGGCCGGGTGTACTCCATCTTCGCCCAGACCAGCACCATCAATGAG  
2754 ATGCACCAGGTGGTGTGCGACCAGATCCTGAACCGGCTGTGCAGAATCG  
2755 GCGACCAGAAGCTGTACGATTACGTGGGACTGGGCAAGAAGGACGAAAT  
2756 CGACTACAAGCAGAAGGTGGCCTGGTTCAAGGAGCACATCAGCATCCGG  
2757 AGAGGATTCCTGAGAAAGAAGTTCTGGTACGATAGCAAGAAGGGATTCGC  
2758 AAAGCTGGTGGAGGAACACCTGGAGTCCGGCGGCGGCCAGCGCGACG  
2759 TGGGCCTGGACAAGAAGTACTACCACATCGACGCCATCGGCAGATTCGA  
2760 GGGCGCCAACCCCGCCCTGTACGAGACCCTGGCCAGAGATCGGCTGTG  
2761 CCTCATGATGGCCAGTACTTCTGGGCAGCGTGAGAAAGGAACTGGGC  
2762 AACAAGATTGTGTGGAGCAACGACAGCATCGAACTGCCTaagcgcaccgcccga  
2763 tggttccgagttcgaaagccccaaaaaaagcgcaaggtcGGTGGAGGCGGAGGTTCTGG  
2764 GGGAGGAGGTAGTGGCGGTGGTGGTTCAGGAGGCGGCGGAAGCagactg  
2765 catttaccgcaggttttagctgacgctgctcacgcctggtcctgggtaagtttggtgacctgaccgacaacttc  
2766 tcctcccctcacgctcgagaaaagtgtggtgagtcgtcatgacaacaggcacagatgtaaagatgc  
2767 caaggtgataagtgtttctacaggaACcaaagtattaatggtgaatacatgagtgatcgtggccttgatta  
2768 aatgactgccatgcagaaataatatctcgagatccttgcagatttcttatacacaactgagcttacttaa  
2769 ataacaaagatgatcaaaaaagatccatcttccagaaatcagagcgagggggggttaggctgaaggaga  
2770 atgtccagtttcatctgtacatcagcacctctccctgtggagatgccagaatcttctcaccacatgagccaatc  
2771 ctggaagaaccagcagatagacacccaaatcgtaaagcaagaggacagctacggaccaaaatagagt  
2772 ctggtcaggggacgattccagtgcgctccaatgagatccaaacgtgggacgggggtgctgcaagggg  
2773 agcggctgctcaccatgtcctgcagtgacaagattgcacgctggaacgtggtggcatccagggatcactg  
2774 ctacgatttctgaggagcccatttacttctcgagcatcatcctgggcagccttaccacggggaccaccttcc  
2775 agggcatgtaccagcggatctcaacatagaggacctgccacctctctacacctcaacaagcctttgct  
2776 cagtggcatcagcaatgcagaagcacggcagccaggggaaggcccccaacttcagtgtcaactggacgg  
2777 taggcgactccgctattgaggtcatcaacgccacgactgggaaggatgagctgggccgcgctcccgcct  
2778 gtgtaagcACGCGTTGTAAGTGTGCTGGATGCGTGTGCACGGCAAGGTTCC  
2779 CTCCCACTTACTACGCTCCAAGATTACCAAGCCCAACGTGTACCATGAGT  
2780 CCAAGCTGGCGGCAAAGGAGTACCAGGCCGCCAAGGCGCGTCTGTTCA  
2781 CAGCCTTCATCAAGGCGGGGCTGGGGGCTGGGTGGAGAAGCCCACCG  
2782 AGCAGGACCAGTTCTCACTCACGAAAAGGCCGGCGGCCACGAAAAAGG  
2783 CCGGCCAGGCAAAAAGAAAAAGtaccatacagatgttccagattacgcttatccctacgac  
2784 gtgcctgattatgatacccatatgatgtccccgactatgccGCGGCCGCTGATTACAAAGAC  
2785 GATGACGATAAGtaaATCGAATTCCGCTCGAGATAATCAACCTCTGGATTAC

2786 AAAATTTGTGAAAGATTGACTGGTATTCTTAACTATGTTGCTCCTTTTACGC  
2787 TATGTGGATACGCTGCTTTAATGCCTTTGTATCATGCTATTGCTTCCCGTAT  
2788 GGCTTTCATTTTCTCCTCCTTGTATAAATCCTGGTTAGTTCTTGCCACGGC  
2789 GGAATCATCGCCGCCTGCCTTGCCCGCTGCTGGACAGGGGCTCGGCT  
2790 GTTGGGCACTGACAATTCCGTGGTGTGTTATTTGTGAAATTTGTGATGCTAT  
2791 TGCTTTATTTGTAACCATCTAGCTTTATTTGTGAAATTTGTGATGCTATTGCT  
2792 TTATTTGTAACCATTATAAGCTGCAATAAACAAGTTAACAACAACAATTGCA  
2793 TTCATTTTATGTTTCAGGTTTCAGGGGGAGATGTGGGAGGTTTTTTAAAGC  
2794 GGCCGCCggccgagGGCCGCAGGAACCCCTAGTGATGGAGTTGGCCACTC  
2795 CCTCTCTGCGCGCTCGCTCGCTCACTGAGGCCGGGCGACCAAAGGTGCG  
2796 CCCGACGCCCGGGCTTTGCCCGGGCGGCCTCAGTGAGCGAGCGAGCG  
2797 CGCAGCTGCCTGCAGGGGCGCCTGATGCGGTATTTTCTCCTTACGCATC  
2798 TGTGCGGTATTTACACCCGCATACGTCAAAGCAACCATAGTACGCGCCCT  
2799 GTAGCGGCGCATTAAAGCGCGGCGGGTGTGGTGGTTACGCGCAGCGTGA  
2800 CCGCTACACTTGCCAGCGCCTTAGCGCCCGCTCCTTTGCTTTCTTCCCT  
2801 TCCTTTCTCGCCACGTTCCGCCGGCTTTCCCGTCAAGCTCTAAATCGGG  
2802 GGCTCCCTTTAGGGTTCCGATTTAGTGCTTTACGGCACCTCGACCCCAA  
2803 AACTTGATTTGGGTGATGGTTCACGTAGTGGGCCATCGCCCTGATAGAC  
2804 GGTTTTTCGCCCTTTGACGTTGGAGTCCACGTTCTTTAATAGTGGACTCTT  
2805 GTTCCAAACTGGAACAACACTCAACTCTATCTCGGGCTATTCTTTGATTT  
2806 ATAAGGGATTTTGCCGATTTCCGGTCTATTGTTAAAAAATGAGCTGATTTAA  
2807 CAAAATTTAACGCGAATTTTAAACAAAATATTAACGTTTACAATTTTATGGTG  
2808 CACTCTCAGTACAATCTGCTCTGATGCCGCATAGTTAAGCCAGCCCCGAC  
2809 ACCCGCCAACACCCGCTGACGCGCCCTGACGGGCTTGTCTGCTCCCGG  
2810 CATCCGCTTACAGACAAGCTGTGACCGTCTccgggagctgcatgtgtcagaggtttca  
2811 ccgtcatcaccgaaacgcgcgagACGAAAGGGCCTCGTGATACGCCTATTTTTATAG  
2812 GTTAATGTCATGATAATAATGGTTTCTTAGACGTCAGGTGGCACTTTTTCGG  
2813 GGAAATGTGCGCGGAACCCCTATTTGTTTATTTTTCTAAATACATTCAAATA  
2814 TGTATCCGCTCATGAGACAATAACCCTGATAAATGCTTCAATAATATTGAAA  
2815 AAGGAAGAGTATGAGTATTCAACATTTCCGTGTCGCCCTTATTCCTTTTT  
2816 TGCGGCATTTTGCCTTCCCTGTTTTTGTCTACCCAGAAACGCTGGTGAAAG  
2817 TAAAGATGCTGAAGATCAGTTGGGTGCACGAGTGGGTTACATCGAACTG  
2818 GATCTCAACAGCGGTAAGATCCTTGAGAGTTTTTCGCCCGAAGAACGTTT  
2819 TCCAATGATGAGCACTTTTAAAGTTCTGCTATGTGGCGCGGTATTATCCCG  
2820 TATTGACGCCGGCAAGAGCAACTCGGTCCGCCATACACTATTCTCAGA  
2821 ATGACTTGGTTGAGTACTACCCAGTCACAGAAAAGCATCTTACGGATGGC  
2822 ATGACAGTAAGAGAATTATGCAGTGCTGCCATAACCATGAGTGATAACACT  
2823 GCGGCCAACTTACTTCTGACAACGATCGGAGGACCGAAGGAGCTAACCG  
2824 CTTTTTTGCACAACATGGGGGATCATGTAACCTGCCTTGATCGTTGGGAA  
2825 CCGGAGCTGAATGAAGCCATACCAAACGACGAGCGTGACACCACGATGC  
2826 CTGTAGCAATGGCAACAACGTTGCGCAAACCTATTAACCTGGCGAACTACTTA  
2827 CTCTAGCTTCCCGGCAACAATTAATAGACTGGATGGAGGCGGATAAAGTT  
2828 GCAGGACCACTTCTGCGCTCGGCCCTTCCGGCTGGCTGGTTTATTGCTG  
2829 ATAAATCTGGAGCCGGTGAGCGTGGAAGCCGCGGTATCATTGCAGCACT

2830 GGGGCCAGATGGTAAGCCCTCCCGTATCGTAGTTATCTACACGACGGGG  
2831 AGTCAGGCAACTATGGATGAACGAAATAGACAGATCGCTGAGATAGGTGC  
2832 CTCACTGATTAAGCATTGGTAAGTGTGACACCAAGTTTACTCATATATACTT  
2833 TAGATTGATTTAAACTTCATTTTTTAATTTAAAGGATCTAGGTGAAGATCCT  
2834 TTTTGATAATCTCATGACCAAATCCCTTAACGTGAGTTTTTCGTTCCACTG  
2835 AGCGTCAGACCCCGTAGAAAAGATCAAAGGATCTTCTTGAGATCCTTTTTT  
2836 TCTGCGCGTAATCTGCTGCTTGCAAACAAAAAACACCGCTACCAGCG  
2837 GTGGTTTGTGGCCGGATCAAGAGCTACCAACTCTTTTTCCGAAGGTAAC  
2838 TGGCTTCAGCAGAGCGCAGATACCAAATACTGTTCTTCTAGTGTAGCCGT  
2839 AGTTAGGCCACCACTTCAAGAACTCTGTAGCACCGCCTACATACCTCGCT  
2840 CTGCTAATCCTGTTACCAGTGGCTGCTGCCAGTGGCGATAAGTCGTGTCT  
2841 TACCGGGTTGGACTCAAGACGATAGTTACCGGATAAGGCGCAGCGGTCTG  
2842 GGCTGAACGGGGGGTTCGTGCACACAGCCCAGCTTGGAGCGAACGACC  
2843 TACACCGAACTGAGATACCTACAGCGTGAGCTATGAGAAAGCGCCACGCT  
2844 TCCCGAAGGGAGAAAGGCGGACAGGTATCCGGTAAGCGGCAGGGTCTGG  
2845 AACAGGAGAGCGCACGAGGGAGCTTCCAGGGGGAAACGCCTGGTATCT  
2846 TTATAGTCCTGTCGGGTTTTCGCCACCTCTGACTTGAGCGTCGATTTTTGT  
2847 GATGCTCGTCAGGGGGGCGGAGCCTATGGAAAACGCCAGCAACGCGG  
2848 CCTTTTTACGGTTCCTGGCCTTTTGCTGGCCTTTTGCTCACATGT

2849

2850 >E1

2851 CCTGCAGGCAGCTGCGCGCTCGCTCGCTCACTGAGGCCGCCCGGGCG  
2852 TCGGGCGACCTTTGGTCGCCCGGCCTCAGTGAGCGAGCGAGCGCGCA  
2853 GAGAGGGAGTGCCAACCTCCATCACTAGGGGTTCTGCGGCCTCTAGAg  
2854 agggcctattcccatgattccttcatatttgcataacgatacaaggctgtagagagataattggaattaatt  
2855 gactgtaaacacaaagatattagtacaaaatcgtgacgtagaaagtaataatttcttggttagttgacagttt  
2856 aaaattatgttttaaagtactatcatatgctaccgtaactgaaagtatttcgatttcttgctttatatacttG  
2857 TGAAAGGACGAAACACCGGTCTGCAATATAAGCTGCCAACCCTTGTCA  
2858 ATGAATGTGAGGGACTCCTGCTGGAGCAGCCCCGATTTGTGGGGTGAT  
2859 TACAGCTTTTTTTGATATCtaggtcttgaaaggagtgggaattggctccggtgccggtcagtggg  
2860 cagagcgcacatcgcccacagtccccgagaagttggggggaggggtcggcaattgatccggtgcctaga  
2861 gaaggtggcgcggggtaactgggaaagtgatgctgtactggctccgcttttcccgaggggtggggga  
2862 gaaccgtatataagtgacgtagtcgccgtgaacgctcttttcgcaacggggttgccgccagaacacaggac  
2863 ACCGGTGCCACCATGGCCCCAAGAAGAAGaGGAAGGTGCTGAGCATGT  
2864 ACTGCCTGAAGGACAGCAGATTCACCAAGGCCTGGGATAAGCGGGTGCT  
2865 GCTGTTTCAGAGACATCCTGGCCCAGCTGGGAAGAATCCCCGCCGAGGC  
2866 CTACGAGTACTACCACGGCGAGCAGGGTGATAAGAAGAGAGCTAACGAC  
2867 AATGAGGGCACAAATCCCAAGCGGCACAAGGACAAGTTCATCGAATTTGC  
2868 ACTGCACTACCTGGAAGCCCAGCACAGCGAGATCTGCTTCGGCAGACGC  
2869 CACATCGTGCGGGAAGAGGGCCGGCGCCGGCGATGAGCACAAGAAGCAC  
2870 CGGACCAAGGGAAAGGTGGTGGTGGACTTCAGCAAGAAGGACGAGGAC  
2871 CAGAGCTACTATATCTCCAAGAACAACGTGATCGTGCGGATCGACAAGAA  
2872 CGCCGGCCCTAGAAGCTACCGGATGGGCCTGAACGAGCTGAAGTACCTC  
2873 GTGCTGCTGAGCCTGCAGGGGAAGGGCGACGATGCCATCGCCAAGCTG

2874 TACAGATACAGACAGCACGTGGAGAACATCCTGGATGTGGTGAAGGTGA  
2875 CCGATAAGGATAACCACGTGTTCCCTGCCCGCTTCGTGCTGGAGCAGCA  
2876 CGGCATCGGCAGAAAGGCCCTTCAAGCAGCGGATCGATGGACGGGTGAA  
2877 GCACGTGCGGGGCGTGTGGGAGAAGAAGAAGGCCGCCACCAATGAAAT  
2878 GACCCTGCACGAGAAGGCCAGAGACATCCTGCAGTACGTGAACGAAAAC  
2879 TGCACCCGGTCCTTCAACCCTGGCGAATAACAACAGACTGCTGGTGTGCC  
2880 TGGTGGGCAAGGACGTGGAGAACTTTTCAGGCCGGCCTGAAGCGGCTGC  
2881 AGCTGGCCGAAAGGATCGATGGCCGGGTGTACTIONCATCTTCGCCCAGAC  
2882 CAGCACCATCAATGAGATGCACCAGGTGGTGTGCGACCAGATCCTGAAC  
2883 CGGCTGTGCAGAATCGGCGACCAGAAGCTGTACGATTACGTGGGACTGG  
2884 GCAAGAAGGACGAAATCGACTACAAGCAGAAGGTGGCCTGGTTCAAGGA  
2885 GCACATCAGCATCCGGAGAGGATTCTGAGAAAGAAGTTCTGGTACGATA  
2886 GCAAGAAGGGATTTCGCAAAGCTGGTGGAGGAACACCTGGAGTCCGGCG  
2887 GCGGCCAGCGCGACGTGGGCCTGGACAAGAAGTACTACCACATCGACG  
2888 CCATCGGCAGATTTCGAGGGCGCCAACCCCGCCCTGTACGAGACCCTGG  
2889 CCAGAGATCGGCTGTGCCTCATGATGGCCCAGTACTTCTGGGCAGCGT  
2890 GAGAAAGGAACTGGGCAACAAGATTGTGTGGAGCAACGACAGCATCGAA  
2891 CTGCCTCCCAAGAAGAAGCGGAAGGTGGGTGGAGGCGGAGGTTCTGGG  
2892 GGAGGAGGTAGTGGCGGTGGTGGTTCAGGAGGCGGCGGAAGC  
2893 ttaccgcaggttttagctgacgctgtctcacgcctggtcctgggtaagtttggtgacctgaccgacaactctc  
2894 ctcccctcacgctcgcagaaaagtgtgctggctggagtcgcatgacaacaggcacagatgttaaagatgcc  
2895 aaggtgataagtgtttctacaggaACcaaagtattaatggtgaatacatgagtgatcgtggccttgcat  
2896 atgactgccatgcagaaataatatctcggagatcctgtcagattctttatacacaacttgagcttacttaa  
2897 taacaaagatgatcaaaaaagatccatcttcagaaatcagagcgaggggggttaggctgaaggagaat  
2898 gtccagttcatctgtacatcagcacctctccctgtggagatgccagaatcttctcaccacatgagccaatcct  
2899 ggaagaaccagcagatagacacccaaatcgtaaagcaagaggacagctacggacaaaatagagtct  
2900 ggtcaggggacgattccagtgcgctccaatgcgagcatcaaacgtgggacggggtgctgcaagggga  
2901 gcggtgctcaccatgtcctgcagtgacaagattgcacgctggaacgtggtgggcatccagggatcactgc  
2902 tcagcatttcgtggagcccatttactctcagatcatctgggacgctttaccacggggaccaccttcca  
2903 gggcatgtaccagcggatctccaacatagaggacctgccacctctctacacctcaacaagccttggctc  
2904 agtggcatcagcaatgcagaagcacggcagccaggggaaggcccccaactcagtgcaactggacggt  
2905 aggcgactccgctattgaggtcatcaacgccacgactgggaaggatgagctgggcccgcgctcccgcct  
2906 gtgtaagcACGCGTTGTACTIONGTGCTGGATGCGTGTGCACGGCAAGGTTCC  
2907 CTCCCACTTACTACGCTCCAAGATTACCAAGCCCAACGTGTACCATGAGT  
2908 CCAAGCTGGCGGCAAAGGAGTACCAGGCCGCCAAGGCGCGTCTGTTCA  
2909 CAGCCTTCATCAAGGCGGGGCTGGGGGCCTGGGTGGAGAAGCCCACCG  
2910 AGCAGGACCAGTTCTCACTIONCACGGGATCCtaccatacgatgttccagattacgcttatc  
2911 cctacgacgtgcctgattatgatacccatatgatgtccccgactatgccGCGGCCGCTGATTACA  
2912 AAGACGATGACGATAAGtGAgaattcCTAGAGCTCGCTGATCAGCCTCGACT  
2913 GTGCCTTCTAGTTGCCAGCCATCTGTTGTTTGGCCCTCCCCCGTGCTTC  
2914 CTTGACCCTGGAAGGTGCCACTCCCCTGTCTTTTCTAATAAAAATGAGG  
2915 AAATTGCATCGCATTGTCTGAGTAGGTGTCATTCTATTCTGGGGGGTGGG  
2916 GTGGGGCAGGACAGCAAGGGGGAGGATTGGGAAGAgAATAGCAGGCAT  
2917 GCTGGGGAgcGGCCGCAGGAACCCCTAGTGATGGAGTTGGCCACTCCCT

2918 CTCTGCGCGCTCGCTCGCTCACTGAGGCCGGGCGACCAAAGGTCGCCC  
2919 GACGCCCGGGCTTTGCCCGGGCGGCCTCAGTGAGCGAGCGAGCGCGC  
2920 AGCTGCCTGCAGGGGCGCCTGATGCGGTATTTTCTCCTTACGCATCTGTG  
2921 CGGTATTTACACCGCATACGTCAAAGCAACCATAGTACGCGCCCTGTAG  
2922 CGGCGCATTAAAGCGCGGGCGGGTGTGGTGGTTACGCGCAGCGTGACCGC  
2923 TACACTTGCCAGCGCCTTAGCGCCCGCTCCTTTTCGCTTTCTTCCCTTCT  
2924 TTCTCGCCACGTTTCGCCGGCTTTCCCCGTCAAGCTCTAAATCGGGGGCT  
2925 CCCTTTAGGGTTCCGATTTAGTGCTTTACGGCACCTCGACCCCAAAAAAC  
2926 TTGATTTGGGTGATGGTTCACGTAGTGGGCCATCGCCCTGATAGACGGTT  
2927 TTTTCGCCCTTTGACGTTGGAGTCCACGTTCTTTAATAGTGGACTCTTGTTT  
2928 CAAACTGGAACAACACTCAACTCTATCTCGGGCTATTCTTTTGATTTATAAG  
2929 GGATTTTGCCGATTTTCGGTCTATTGGTTAAAAAATGAGCTGATTTAACAAA  
2930 AATTTAACGCGAATTTTAACAAAATATTAACGTTTACAATTTTATGGTGCCT  
2931 CTCAGTACAATCTGCTCTGATGCCGCATAGTTAAGCCAGCCCCGACACCC  
2932 GCCAACACCCGCTGACGCGCCCTGACGGGCTTGTCTGCTCCCGGCATC  
2933 CGCTTACAGACAAGCTGTGACCGTCTccgggagctgcatgtgtcagaggtttcaccgtca  
2934 tcaccgaaacgcgagACGAAAGGGCCTCGTGATACGCCTATTTTTATAGGTTA  
2935 ATGTCATGATAATAATGGTTTCTTAGACGTCAGGTGGCACTTTTCGGGGAA  
2936 ATGTGCGCGGAACCCCTATTTGTTTATTTTTCTAAATACATTCAAATATGTAT  
2937 CCGCTCATGAGACAATAACCCTGATAAATGCTTCAATAATATTGAAAAAGG  
2938 AAGAGTATGAGTATTCAACATTTCCGTGTCGCCCTTATTCCCTTTTTTTCGCG  
2939 GCATTTTGCCTTCTGTTTTTCTCACCCAGAAACGCTGGTGAAAGTAAA  
2940 AGATGCTGAAGATCAGTTGGGTGCACGAGTGGGTACATCGAACTGGAT  
2941 CTCAACAGCGGTAAGATCCTTGAGAGTTTTTCGCCCGAAGAACGTTTTTCC  
2942 AATGATGAGCACTTTTAAAGTTCTGCTATGTGGCGCGGTATTATCCCGTAT  
2943 TGACGCCGGGCAAGAGCAACTCGGTGCGCCGCATACACTATTCTCAGAAT  
2944 GACTTGGTTGAGTACTACCAGTACAGAAAAGCATCTTACGGATGGCAT  
2945 GACAGTAAGAGAATTATGCAGTGCTGCCATAACCATGAGTGATAAACTG  
2946 CGGCCAACTTACTTCTGACAACGATCGGAGGACCGAAGGAGCTAACCGC  
2947 TTTTTTGCACAACATGGGGGATCATGTAACCTCGCCTTGATCGTTGGGAAC  
2948 CGGAGCTGAATGAAGCCATACCAAACGACGAGCGTGACACCACGATGCC  
2949 TGTAGCAATGGCAACAACGTTGCGCAAACCTATTAACCTGGCGAACTACTTAC  
2950 TCTAGCTTCCCGGCAACAATTAAGACTGGATGGAGGCGGATAAAGTTG  
2951 CAGGACCACTTCTGCGCTCGGCCCTTCCGGCTGGCTGGTTTTATTGCTGA  
2952 TAAATCTGGAGCCGGTGAGCGTGGAAGCCGCGGTATCATTGCAGCACTG  
2953 GGGCCAGATGGTAAGCCCTCCCGTATCGTAGTTATCTACACGACGGGGA  
2954 GTCAGGCAACTATGGATGAACGAAATAGACAGATCGCTGAGATAGGTGCC  
2955 TCACTGATTAAGCATTGGTAACGTGTCAGACCAAGTTTACTCATATATACTTT  
2956 AGATTGATTTAAACTTTCATTTTTAATTTAAAAGGATCTAGGTGAAGATCCTT  
2957 TTTGATAATCTCATGACCAAATCCCTTAACGTGAGTTTTTCGTTCCACTGA  
2958 GCGTCAGACCCCGTAGAAAAGATCAAAGGATCTTCTTGAGATCCTTTTTTTT  
2959 CTGCGCGTAATCTGCTGCTTGCAAACAAAAAAACCACCGCTACCAGCGG  
2960 TGGTTTGGTTGCCGGATCAAGAGCTACCAAACCTTTTTTCCGAAGGTAAC  
2961 GGCTTCAGCAGAGCGCAGATACCAAATACTGTTCTTCTAGTGTAGCCGTA

2962 GTTAGGCCACCACTTCAAGAACTCTGTAGCACCGCCTACATACCTCGCTC  
2963 TGCTAATCCTGTTACCAGTGGCTGCTGCCAGTGGCGATAAGTCGTGTCTT  
2964 ACCGGGTTGGACTCAAGACGATAGTTACCGGATAAGGCGCAGCGGTCGG  
2965 GCTGAACGGGGGGTTCGTGCACACAGCCCAGCTTGGAGCGAACGACCT  
2966 ACACCGAACTGAGATACCTACAGCGTGAGCTATGAGAAAGCGCCACGCT  
2967 TCCCGAAGGGAGAAAGGCGGACAGGTATCCGGTAAGCGGCAGGGTCCGG  
2968 AACAGGAGAGCGCACGAGGGAGCTTCCAGGGGGAAACGCCTGGTATCT  
2969 TTATAGTCCTGTTCGGGTTTCGCCACCTCTGACTTGAGCGTCGATTTTTGT  
2970 GATGCTCGTCAGGGGGGCGGAGCCTATGGAAAACGCCAGCAACGCGG  
2971 CCTTTTTACGGTTCCTGGCCTTTTGCTGGCCTTTTGCTCACATGT

2972

2973 >E2

2974 CCTGCAGGCAGCTGCGCGCTCGCTCGCTCACTGAGGCCGCCCGGGCG  
2975 TCGGGCGACCTTTGGTCGCCCGGCCTCAGTGAGCGAGCGAGCGCGCA  
2976 GAGAGGGAGTGGCCAACCTCCATCACTAGGGGTTCTGCGGCCTCTAGAg  
2977 agggcctatttcccatgattcctcatatttgcataacgatacaaggctgtagagagataattggaattaattt  
2978 gactgtaaacacaaagatattagtaacaaatcgtgacgtagaaagtaataatttcttgggtagtttgcagttt  
2979 aaaattatgtttaaaatggactatcatatgcttaccgtaacttgaaagtatttgcatttcttggctttatatacttG  
2980 TGGAAAGGACGAAACACCGGCTGGAGCAGCCCCCGATTTGTGGGGTGA  
2981 TTACAGCGTCTGCAATATAAGCTGCCAACCCTTGTCAATGAATGTGAGG  
2982 GACTCCTGCTGGAGCAGCCCCCGATTTGTGGGGTGATTACAGCTTTTTTTT  
2983 GATATCtaggtcttgaaggagtgggaattggctccggtgccgctcagtgggcagagcgcacatcgcc  
2984 cacagtccccgagaagttgggggggaggggctcggcaattgatccggtgcctagagaaggtggcgcggggg  
2985 aaactgggaaagtgatgtcgtgactggctccgctttttcccgagggtgggggagaaccgtatataagtgc  
2986 agtagtcgccgtgaacgttcttttcgcaacgggtttgccgccagaacacaggacACCGGTGCCAC  
2987 CATGGCCCCCAAGAAGAAGaGGAAGGTGCTGAGCATGTACTGCCTGAAG  
2988 GACAGCAGATTCACCAAGGCCTGGGATAAGCGGGTGCTGCTGTTTCAGAG  
2989 ACATCCTGGCCCAGCTGGGAAGAATCCCCGCCGAGGCCTACGAGTACTA  
2990 CCACGGCGAGCAGGGTGATAAGAAGAGAGCTAACGACAATGAGGGCACA  
2991 AATCCCAAGCGGCACAAGGACAAGTTCATCGAATTTGCACTGCACTACCT  
2992 GGAAGCCCAGCACAGCGAGATCTGCTTCGGCAGACGCCACATCGTGCG  
2993 GGAAGAGGCCGGCGCCGGCGATGAGCACAAGAAGCACCGGACCAAGG  
2994 GAAAGGTGGTGGTGGACTTCAGCAAGAAGGACGAGGACCAGAGCTACTA  
2995 TATCTCCAAGAACAACGTGATCGTGCGGATCGACAAGAACGCCGGCCCT  
2996 AGAAGCTACCGGATGGGCCTGAACGAGCTGAAGTACCTCGTGCTGCTGA  
2997 GCCTGCAGGGGAAGGGCGACGATGCCATCGCCAAGCTGTACAGATACAG  
2998 ACAGCACGTGGAGAACATCCTGGATGTGGTGAAGGTGACCGATAAGGAT  
2999 AACCACGTGTTCTGCCCCGCTTCGTGCTGGAGCAGCACGGCATCGGC  
3000 AGAAAGGCCTTCAAGCAGCGGATCGATGGACGGGTGAAGCACGTGCGG  
3001 GGCGTGTGGGAGAAGAAGAAGGCCGCCACCAATGAAATGACCCTGCAC  
3002 GAGAAGGCCAGAGACATCCTGCAGTACGTGAACGAAAACCTGCACCCGGT  
3003 CCTTCAACCCTGGCGAATAACAAGACTGCTGGTGTGCCTGGTGGGCAA  
3004 GGACGTGGAGAACTTTCAGGCCGGCCTGAAGCGGCTGCAGCTGGCCGA  
3005 AAGGATCGATGGCCGGGTGTAATCCTTCGCCAGACCAGCACCATC

3006 AATGAGATGCACCAGGTGGTGTGCGACCAGATCCTGAACCGGCTGTGCA  
3007 GAATCGGCGACCAGAAGCTGTACGATTACGTGGGACTGGGCAAGAAGGA  
3008 CGAAATCGACTACAAGCAGAAGGTGGCCTGGTTCAAGGAGCACATCAGC  
3009 ATCCGGAGAGGATTCTGAGAAAGAAGTTCTGGTACGATAGCAAGAAGG  
3010 GATTCGCAAAGCTGGTGGAGGAACACCTGGAGTCCGGCGGGCCAGC  
3011 GCGACGTGGGCTGGACAAGAAGTACTACCACATCGACGCCATCGGCAG  
3012 ATTCGAGGGCGCCAACCCCGCCCTGTACGAGACCCTGGCCAGAGATCG  
3013 GCTGTGCCTCATGATGGCCCAGTACTTCTGGGCAGCGTGAGAAAGGAA  
3014 CTGGGCAACAAGATTGTGTGGAGCAACGACAGCATCGAACTGCCTCCCA  
3015 AGAAGAAGCGGAAGGTGGGTGGAGGCGGAGGTTCTGGGGGAGGAGGT  
3016 AGTGGCGGTGGTGGTTCAGGAGGCGGCGGAAGCagctgcatttaccgcaggttt  
3017 agctgacgctgtctcacgcctggtcctggtaagtttggtagctgaccgacaacttctcctcccctcacgctc  
3018 gcagaaaagtgtgctggagctgcatgacaacaggcacagatgttaaagatgccaaggtgataagtg  
3019 ttctacaggaACcaaatgtattaatggtgaatacatgagtgatcggtgcttgcattaatgactgcatgca  
3020 gaaataatatctcgagatccttgctcagatttcttatacacaactgagcttacttaataacaagatgatc  
3021 aaaaaagatccatcttcagaaatcagagcagggggggttaggctgaaggagaatgtccagtttcaictgt  
3022 acatcagcacctctcctgtggagatgccagaatctctcaccacatgagccaatcctggaagaaccagca  
3023 gatagacacccaaatcgtaaagcaagaggacagctacggaccaaataagagtctggtcaggggacgat  
3024 tccagtgcgtccaatgcgagcatcaaacgtgggacgggggtgctgcaaggggagcggctgctcaccat  
3025 gtctctcagtgacaagattgcacgctggaacgtgggtggcatccaggatcactgctcagcatttctgga  
3026 gccatttacttctcagcatcatcctgggacgcttaccacggggaccaccttccagggccatgtaccag  
3027 cggatctccaacatagaggacctgccacctctctacacctcaacaagccttctcagtggtcagcaat  
3028 gcagaagcacggcagccaggggaaggccccaacttcagtgtcaactggacggtaggagcactccgctatt  
3029 gaggtcatcaacgccacgactgggaaggatgagctgggcccgcgctcccgcctgtgtaagcACGCG  
3030 TTGTACTGTGCTGGATGCGTGTGCACGGCAAGGTTCCCTCCCACTTACT  
3031 ACGCTCCAAGATTACCAAGCCCAACGTGTACCATGAGTCCAAGCTGGCG  
3032 GCAAAGGAGTACCAGGCCGCAAGGCGCGTCTGTTTACAGCCTTCATCA  
3033 AGGCGGGGCTGGGGGCTGGGTGGAGAAGCCCACCGAGCAGGACCAG  
3034 TTCTCACTCACGGGATCctaccatacgatgttccagattacgcttatccctacgacgtgcctgatt  
3035 atgcataccatgatgtccccgactatgccGCGGCCGCTGATTACAAAGACGATGACG  
3036 ATAAGtGAgaattcCTAGAGCTCGCTGATCAGCCTCGACTGTGCCTTCTAGTT  
3037 GCCAGCCATCTGTTGTTTGGCCCTCCCCCGTGCCTTCTTGACCCTGGA  
3038 AGGTGCCACTCCCACTGTCTTTTCTAATAAAATGAGGAAATTGCATCGCA  
3039 TTGTCTGAGTAGGTGTCATTCTATTCTGGGGGGTGGGGTGGGGCAGGAC  
3040 AGCAAGGGGGAGGATTGGGAAGAgAATAGCAGGCATGCTGGGGAgcGGC  
3041 CGCAGGAACCCCTAGTGATGGAGTTGGCCACTCCCTCTCTGCGCGCTCG  
3042 CTCGCTCACTGAGGCCGGGCGACCAAAGTCCGCCGACGCCCGGGCTT  
3043 TGCCCGGGCGGCCTCAGTGAGCGAGCGAGCGCGCAGCTGCCTGCAGG  
3044 GGCGCCTGATGCGGTATTTTCTCCTTACGCATCTGTGCGGTATTTACAC  
3045 CGCATAAGTCAAAGCAACCATAGTACGCGCCCTGTAGCGGCGCATTAAGC  
3046 GCGGCGGGTGTGGTGGTTACGCGCAGCGTGACCGCTACACTTGCCAGC  
3047 GCCTTAGCGCCCGCTCCTTTGCTTTCTTCCCTTCTTTCTCGCCACGTT  
3048 CGCCGGCTTTCCCGTCAAGCTCTAAATCGGGGGCTCCCTTTAGGGTTC  
3049 CGATTTAGTGCTTTACGGCACCTCGACCCCAAAAACTTGATTTGGGTGA

3050 TGGTTCACGTAGTGGGCCATCGCCCTGATAGACGGTTTTTCGCCCTTTGA  
3051 CGTTGGAGTCCACGTTCTTTAATAGTGGACTCTTGTTCCAAACTGGAACA  
3052 AACTCAACTCTATCTCGGGCTATTCTTTTGATTTATAAGGGATTTTGCCGA  
3053 TTTTCGGTCTATTGGTTAAAAAATGAGCTGATTTAACAAAAATTTAACGCGAA  
3054 TTTTAACAAAATATTAACGTTTACAATTTTATGGTGC ACTCTCAGTACAATCT  
3055 GCTCTGATGCCGCATAGTTAAGCCAGCCCCGACACCCGCCAACACCCGC  
3056 TGACGCGCCCTGACGGGCTTGTCTGCTCCCGGCATCCGCTTACAGACAA  
3057 GCTGTGACCGTCTccgggagctgcatgtgtcagaggtttcaccgtcatcaccgaaacgcgag  
3058 ACGAAAGGGCCTCGTGATACGCCTATTTTTATAGGTTAATGTCATGATAATA  
3059 ATGGTTTCTTAGACGTCAGGTGGCACTTTTCGGGGAAATGTGCGCGGAA  
3060 CCCCTATTTGTTTATTTTTCTAAATACATTC AATATGTATCCGCTCATGAGA  
3061 CAATAACCCTGATAAATGCTTCAATAATATTGAAAAAGGAAGAGTATGAGTA  
3062 TTCAACATTTCCGTGTGCGCCCTTATTCCCTTTTTTGCGGCATTTTGCCTTC  
3063 CTGTTTTTGTCTACCCAGAAACGCTGGTCAAAGTAAAGATGCTGAAGAT  
3064 CAGTTGGGTGCACGAGTGGGTTACATCGAACTGGATCTCAACAGCGGTA  
3065 AGATCCTTGAGAGTTTTTCGCCCCGAAGAACGTTTTCCAATGATGAGCACT  
3066 TTTAAAGTTCTGCTATGTGGCGCGGTATTATCCCGTATTGACGCCGGGCA  
3067 AGAGCAACTCGGTGCGCCGCATACACTATTCTCAGAATGACTTGGTTGAGT  
3068 ACTCACCAGTCACAGAAAAGCATCTTACGGATGGCATGACAGTAAGAGAA  
3069 TTATGCAGTGCTGCCATAACCATGAGTGATAAACTGCGGCCAACTTACTT  
3070 CTGACAACGATCGGAGGACCGAAGGAGCTAACCGCTTTTTTGCACAACA  
3071 TGGGGGATCATGTA ACTCGCCTTGATCGTTGGGAACCGGAGCTGAATGA  
3072 AGCCATACCAAACGACGAGCGTGACACCACGATGCCTGTAGCAATGGCA  
3073 ACAACGTTGCGCAA ACTATTA ACTGGCGAACTACTTACTCTAGCTTCCCG  
3074 GCAACAATTAATAGACTGGATGGAGGCGGATAAAGTTGCAGGACCACTTC  
3075 TGCGCTCGGCCCTTCCGGCTGGCTGGTTTATTGCTGATAAATCTGGAGCC  
3076 GGTGAGCGTGGAAGCCGCGGTATCATTGCAGCACTGGGGCCAGATGGTA  
3077 AGCCCTCCCGTATCGTAGTTATCTACACGACGGGGAGTCAGGCAACTATG  
3078 GATGAACGAAATAGACAGATCGCTGAGATAGGTGCCTCACTGATTAAGCA  
3079 TTGGTAACTGTCAGACCAAGTTTACTCATATATACTTTAGATTGATTTAAAC  
3080 TTCATTTTTAATTTAAAAGGATCTAGGTGAAGATCCTTTTTTGATAATCTCATG  
3081 ACCAAAATCCCTTAACGTGAGTTTTTCGTTCCACTGAGCGTCAGACCCCGT  
3082 AGAAAAGATCAAAGGATCTTCTTGAGATCCTTTTTTTCTGCGCGTAATCTG  
3083 CTGCTTGCAAACAAAAAACCACCGCTACCAGCGGTGGTTTGTGGCCG  
3084 GATCAAGAGCTACCAACTCTTTTTCCGAAGGTA ACTGGCTTCAGCAGAGC  
3085 GCAGATACCAAATACTGTTCTTCTAGTGTAGCCGTAGTTAGGCCACCACTT  
3086 CAAGAACTCTGTAGCACCGCTACATACCTCGCTCTGCTAATCCTGTTACC  
3087 AGTGGCTGCTGCCAGTGGCGATAAGTCGTGTCTTACCGGGTTGGACTCA  
3088 AGACGATAGTTACCGGATAAGGCGCAGCGGTGCGGCTGAACGGGGGGT  
3089 TCGTGCACACAGCCAGCTTGGAGCGAACGACCTACACCGAACTGAGAT  
3090 ACCTACAGCGTGAGCTATGAGAAAGCGCCACGCTTCCCGAAGGGAGAAA  
3091 GGCGGACAGGTATCCGGTAAGCGGCAGGGTCGGAACAGGAGAGCGCAC  
3092 GAGGGAGCTTCCAGGGGGAAACGCCTGGTATCTTTATAGTCCTGTCGGG  
3093 TTTGCCACCTCTGACTTGAGCGT CGATTTTTGTGATGCTCGTCAGGGGG



3094 GCGGAGCCTATGGAAAAACGCCAGCAACGCGGCCTTTTTACGGTTCCTG  
3095 GCCTTTTGCTGGCCTTTTGCTCACATGT  
3096  
3097 >E3  
3098 CCTGCAGGCAGCTGCGCGCTCGCTCGCTCACTGAGGCCGCCCGGGCG  
3099 TCGGGCGACCTTTGGTCGCCCGGCCTCAGTGAGCGAGCGAGCGCGCA  
3100 GAGAGGGAGTGGCCAACTCCATCACTAGGGGTTCTGCGGCCTCTAGAg  
3101 agggcctatttcccatgattccttcatatttgcataacgatacaaggctgtagagagataattggaattaatt  
3102 gactgtaaacacaaagatattagtacaaaatacgtgacgtagaaagtaataatttcttgggtagtttgcagttt  
3103 aaaattatgttttaaattggactatcatatgcttaccgtaactgaaagtatttgcatttcttggctttatatacttG  
3104 TGGAAAGGACGAAACACCGGTCTGCAATATAAGCTGCCAACCCTTGTC  
3105 ATGAATGTGAGGGACTCCTGCTGGAGCAGCCCCGATTTGTGGGGTGAT  
3106 TACAGCTTTTTTTGATATCtaggtcttgaaggagtggaattggctccggtgccgtagtggg  
3107 cagagcgcacatgcccacagtccccgagaagttggggggaggggtcggcaattgatccggtgcctaga  
3108 gaaggtggcgcggggtaactgggaaagtgatgtcgtgtactggctccgcttttcccgagggtggggga  
3109 gaaccgtatataagtgtagtgcgctgaacgttcttttcgcaacgggttgcggccagaacacaggac  
3110 ACCGGTGCCACCATGGCCCCAAGAAGAAGaGGAAGGTGCTGAGCATGT  
3111 ACTGCCTGAAGGACAGCAGATTCACCAAGGCCTGGGATAAGCGGGTGCT  
3112 GCTGTTTCAGAGACATCCTGGCCCAGCTGGGAAGAATCCCCGCCGAGGC  
3113 CTACGAGTACTACCACGGCGAGCAGGGTGATAAGAAGAGAGCTAACGAC  
3114 AATGAGGGCACAAATCCCAAGCGGCACAAGGACAAGTTCATCGAATTTGC  
3115 ACTGCACTACCTGGAAGCCCAGCACAGCGAGATCTGCTTCGGCAGACGC  
3116 CACATCGTGCGGGAAGAGGCCGGCGCCGGCGATGAGCACAAGAAGCAC  
3117 CGGACCAAGGGAAAGGTGGTGGTGGACTTCAGCAAGAAGGACGAGGAC  
3118 CAGAGCTACTATATCTCCAAGAACAACGTGATCGTGCGGATCGACAAGAA  
3119 CGCCGGCCCTAGAAGCTACCGGATGGGCCTGAACGAGCTGAAGTACCTC  
3120 GTGCTGCTGAGCCTGCAGGGGAAGGGCGACGATGCCATCGCCAAGCTG  
3121 TACAGATACAGACAGCACGTGGAGAACATCCTGGATGTGGTGAAGGTGA  
3122 CCGATAAGGATAACCACGTGTTCTGCCCCGCTTCGTGCTGGAGCAGCA  
3123 CGGCATCGGCAGAAAGGCCTTCAAGCAGCGGATCGATGGACGGGTGAA  
3124 GCACGTGCGGGGCGTGTGGGAGAAGAAGAAGGCCGCCACCAATGAAAT  
3125 GACCCTGCACGAGAAGGCCAGAGACATCCTGCAGTACGTGAACGAAAAC  
3126 TGCACCCGGTCCTTCAACCCTGGCGAATAACAACAGACTGCTGGTGTGCC  
3127 TGGTGGGCAAGGACGTGGAGAACTTTCAGGCCGGCCTGAAGCGGCTGC  
3128 AGCTGGCCGAAAGGATCGATGGCCGGGTGTACTIONCATCTTCGCCAGAC  
3129 CAGCACCATCAATGAGATGCACCAGGTGGTGTGCGACCAGATCCTGAAC  
3130 CGGCTGTGAGAATCGGCGACCAGAAGCTGTACGATTACGTGGGACTGG  
3131 GCAAGAAGGACGAAATCGACTACAAGCAGAAGGTGGCCTGGTTCAAGGA  
3132 GCACATCAGCATCCGGAGAGGATTCTGAGAAAGAAGTTCTGGTACGATA  
3133 GCAAGAAGGGATTTCGCAAAGCTGGTGGAGGAACACCTGGAGTCCGGCG  
3134 GCGGCCAGCGCGACGTGGGCCTGGACAAGAAGTACTACCACATCGACG  
3135 CCATCGGCAGATTCGAGGGCGCCAACCCCGCCCTGTACGAGACCCTGG  
3136 CCAGAGATCGGCTGTGCCTCATGATGGCCCAGTACTTCTGGGCAGCGT  
3137 GAGAAAGGAACTGGGCAACAAGATTGTGTGGAGCAACGACAGCATCGAA

3138 CTGCCTCCCAAGAAGAAGCGGAAGGTGGGTGGAGGCGGAGGTTCTGGG  
3139 GGAGGAGGTAGTGGCGGTGGTGGTTCAGGAGGCGGCGGAAGCcagctgca  
3140 ttaccgcaggttttagctgacgctgtctcacgcctggtcctgggtaagtttggtgacctgaccgacaactctc  
3141 ctccccctcacgctcgcagaaaagtgtgctggctggagtcgtcatgacaacaggcacagatgttaaagatgcc  
3142 aaggtgataagtgtttctacaggaACcaaagtattaatggtgaatacatgagtgatcgtggccttgcat  
3143 atgactgccatgcagaaataataatctcggagatcctgtcagatttcttatacacaacttgagcttacttaa  
3144 taacaaagatgatcaaaaaagatccatcttcagaaatcagagcgagggggggttaggctgaaggagaat  
3145 gtccagtttcatctgtacatcagcacctctccctgtggagatgccagaatcttctcaccacatgagccaatcct  
3146 ggaagaaccagcagatagacacccaaatcgtaaagcaagaggacagctacggaccaaaatagagtct  
3147 ggtcaggggacgattccagtgcgctccaatgcgagcatcaaacgtgggacggggtgctgcaagggga  
3148 gcggtgctcaccatgtcctgcagtgacaagattgcacgctggaacgtggtgggcatccagggatcactgc  
3149 tcagcatttctgaggagcccatttacttctcagatcatcctgggcagcctttaccacggggaccaccttcca  
3150 gggccatgtaccagcggatctccaacatagaggacctgccacctctctacacctcaacaagccttggctc  
3151 agtggcatcagcaatgcagaagcacggcagccaggggaaggccccaacttcagtgtcaactggacggt  
3152 aggcgactccgctattgaggtcatcaacgccacgactgggaaggatgagctgggcccgcgctcccgcct  
3153 gtgtaagcACGCGTTGTAAGTGTGCGTGGATGCGTGTGCACGGCAAGGTTCC  
3154 CTCCCACTTACTACGCTCCAAGATTACCAAGCCCAACGTGTACCATGAGT  
3155 CCAAGCTGGCGGCAAAGGAGTACCAGGCCGCAAGGCGCGTCTGTTCA  
3156 CAGCCTTCATCAAGGCGGGGCTGGGGGCCTGGGTGGAGAAGCCCACCG  
3157 AGCAGGACCAGTTCTCACTCACGGGATCCtaccatacagatgttccagattacgcttacc  
3158 cctacgacgtgcctgattatgatacccatatgatgtccccgactatgccGCGGCCGCTGATTACA  
3159 AAGACGATGACGATAAGtAAATCGAATTCCGCTCGAGATAATCAACCTCTG  
3160 GATTACAAAATTTGTGAAAGATTGACTGGTATTCTTAACCTATGTTGCTCCTT  
3161 TTACGCTATGTGGATACGCTGCTTTAATGCCTTTGTATCATGCTATTGCTTC  
3162 CCGTATGGCTTTTCATTTTCTCCTCCTTGTATAAATCCTGGTTAGTTCTTGCC  
3163 ACGGCGGAACCTCATCGCCGCCTGCCTTGCCCGCTGCTGGACAGGGGCT  
3164 CGGCTGTTGGGCACTGACAATTCCGTGGTGTGTTATTTGTGAAATTTGTGAT  
3165 GCTATTGCTTTATTTGTAACCATCTAGCTTTATTTGTGAAATTTGTGATGCTA  
3166 TTGCTTTATTTGTAACCATTATAAGCTGCAATAAACAAGTTAACAACAACAA  
3167 TTGCATTCATTTTATGTTTCAGGTTACAGGGGAGATGTGGGAGGTTTTTTA  
3168 AAGCGGCCCGCCGGCCGAGGGCCGCAGGAACCCCTAGTGATGGAGTTGG  
3169 CCACTCCCTCTCTGCGCGCTCGCTCGCTCACTGAGGCCGGGCGACCAA  
3170 AGGTGCCCCGACGCCCGGGCTTTGCCCGGGCGGCCTCAGTGAGCGAG  
3171 CGAGCGCGCAGCTGCCTGCAGGGGCGCCTGATGCGGTATTTTCTCCTTA  
3172 CGCATCTGTGCGGTATTTACACCCGCATACGTCAAAGCAACCATAGTACG  
3173 CGCCCTGTAGCGGCGCATTAAAGCGCGGGGCTGTTGGTGGTTACGCGCA  
3174 GCGTGACCGCTACACTTGCCAGCGCCTTAGCGCCCGCTCCTTTGCTTT  
3175 CTTCCCTTCTTTCTCGCCACGTTGCGCGGCTTTCCCCGTCAAGCTCTAA  
3176 ATCGGGGGCTCCCTTTAGGGTTCCGATTTAGTGCTTTACGGCACCTCGAC  
3177 CCCAAAAAATTGATTTGGGTGATGGTTCACGTAGTGGGCCATCGCCCTG  
3178 ATAGACGGTTTTTCGCCCTTTGACGTTGGAGTCCACGTTCTTTAATAGTGG  
3179 ACTCTTGTTCCAAACTGGAACAACACTCAACTCTATCTCGGGCTATTCTTT  
3180 TGATTTATAAGGGATTTTGCCGATTTGCGTCTATTGGTTAAAAAATGAGCTG  
3181 ATTTAACAAAAATTTAACGCGAATTTTAACAAAATATTAACGTTTACAATTTA

3182 TGGTGC ACTCTCAGTACAATCTGCTCTGATGCCGCATAGTTAAGCCAGCC  
3183 CCGACACCCGCCAACACCCGCTGACGCGCCCTGACGGGCTTGTCTGCT  
3184 CCCGGCATCCGCTTACAGACAAGCTGTGACCGTCTccgggagctgcatgtgcaga  
3185 ggTTTTcaccgtcatcaccgaaacgcgcgagACGAAAGGGCCTCGTGATACGCCTATTT  
3186 TTATAGGTTAATGTCATGATAATAATGGTTTCTTAGACGTCAGGTGGCACTT  
3187 TTCGGGGAAATGTGCGCGGAACCCCTATTTGTTTATTTTTCTAAATACATTC  
3188 AAATATGTATCCGCTCATGAGACAATAACCCTGATAAATGCTTCAATAATATT  
3189 GAAAAAGGAAGAGTATGAGTATTCAACATTTCCGTGTCGCCCTTATTCCCT  
3190 TTTTTGCGGCATTTTGCCTTCCTGTTTTTGCTCACCCAGAAACGCTGGTG  
3191 AAAGTAAAAGATGCTGAAGATCAGTTGGGTGCACGAGTGGGTACATCGA  
3192 ACTGGATCTAACAGCGGTAAGATCCTTGAGAGTTTTCGCCCCGAAGAAC  
3193 GTTTTCCAATGATGAGCACTTTTAAAGTTCTGCTATGTGGCGCGGTATTAT  
3194 CCCGTATTGACGCCGGGCAAGAGCAACTCGGTCCGCGCATACTACTATTC  
3195 TCAGAATGACTTGGTTGAGTACTACCAGTCACAGAAAAGCATCTTACGG  
3196 ATGGCATGACAGTAAGAGAATTATGCAGTGCTGCCATAACCATGAGTGATA  
3197 AACTGCGGCCAACTTACTTCTGACAACGATCGGAGGACCGAAGGAGCT  
3198 AACCGCTTTTTTGCACAACATGGGGGATCATGTAACCTCGCCTTGATCGTT  
3199 GGGAACCGGAGCTGAATGAAGCCATACCAAACGACGAGCGTGACACCAC  
3200 GATGCCTGTAGCAATGGCAACAACGTTGCGCAAACCTATTAACCTGGCGAAC  
3201 TACTTACTCTAGCTTCCCGGCAACAATTAAGACTGGATGGAGGCGGATA  
3202 AAGTTGCAGGACCACTTCTGCGCTCGGCCCTTCCGGCTGGCTGGTTTAT  
3203 TGCTGATAAATCTGGAGCCGGTGAGCGTGGAAGCCGCGGTATCATTGCA  
3204 GCACTGGGGCCAGATGGTAAGCCCTCCCGTATCGTAGTTATCTACACGAC  
3205 GGGGAGTCAGGCAACTATGGATGAACGAAATAGACAGATCGCTGAGATAG  
3206 GTGCCTCACTGATTAAGCATTGGTAACCTGTCAGACCAAGTTTACTCATATAT  
3207 ACTTTAGATTGATTTAAAACCTTCATTTTTAATTTAAAAGGATCTAGGTGAAGA  
3208 TCCTTTTTGATAATCTCATGACCAAAATCCCTTAACGTGAGTTTTTCGTTCCA  
3209 CTGAGCGTCAGACCCCGTAGAAAAGATCAAAGGATCTTCTTGAGATCCTT  
3210 TTTTTCTGCGCGTAATCTGCTGCTTGCAAACAAAAAACCACCGCTACCA  
3211 GCGGTGGTTTGTGTTGCCGGATCAAGAGCTACCAACTCTTTTTCCGAAGGT  
3212 AACTGGCTTCAGCAGAGCGCAGATACCAAATACTGTTCTTCTAGTGTAGC  
3213 CGTAGTTAGGCCACCACTTCAAGAACTCTGTAGCACCGCCTACATACCTC  
3214 GCTCTGCTAATCCTGTTACCAGTGGCTGCTGCCAGTGGCGATAAGTCGTG  
3215 TCTTACCGGGTTGGACTCAAGACGATAGTTACCGGATAAGGCGCAGCGG  
3216 TCGGGCTGAACGGGGGGTTCGTGCACACAGCCCAGCTTGGAGCGAACG  
3217 ACCTACACCGAACTGAGATACCTACAGCGTGAGCTATGAGAAAGCGCCAC  
3218 GCTTCCCGAAGGGAGAAAGGCGGACAGGTATCCGGTAAGCGGCAGGGT  
3219 CGGAACAGGAGAGCGCACGAGGGAGCTTCCAGGGGGAAACGCCTGGTA  
3220 TCTTTATAGTCCTGTGCGGTTTCGCCACCTCTGACTTGAGCGTCGATTTTT  
3221 GTGATGCTCGTCAGGGGGGCGGAGCCTATGGAAAACGCCAGCAACGC  
3222 GGCCTTTTTACGGTTCCTGGCCTTTTTGCTGGCCTTTTTGCTCACATGT

3223

3224 >M1

3225 CCTGCAGGCAGCTGCGCGCTCGCTCGCTCACTGAGGCCGCCCGGGCG

3226 TCGGGCGACCTTTGGTCGCCCGGCCTCAGTGAGCGAGCGAGCGCGCA  
3227 GAGAGGGAGTGGCCAACTCCATCACTAGGGGTTCTGCGGCCTCTAGAg  
3228 agggcctatttcccatgattcctcatatttgcataacgatacaaggctgtagagagataattggaattaatt  
3229 gactgtaaacacaaagatattagtaaaaaatacgtgacgtagaaagtaataatttcttgggtagtttgcagttt  
3230 aaaattatgtttaaaatggactatcatatgcttaccgtaactgaaagtatttcgatttcttggctttatatacttG  
3231 TGGAAAGGACGAAACACCGGCTGGAGCAGCCCCGATTTGTGGGGTGA  
3232 TTACAGCGTCTGCAATATAAGCTGCCAACCCTTGTCAATGAATGTGAGG  
3233 GACTCCTGCTGGAGCAGCCCCGATTTGTGGGGTGATTACAGCTTTTTTTT  
3234 GATATCACCCCTTCAGATTAATAAATAACTGAGGTAAGGGCCTGGGTAGGGG  
3235 AAGTGGTGTGAGACGCTCCTGTCTCTCCTCTATCTGCCCATCGGCCCTTT  
3236 GGGGAGGAGGAATGTGCCCAAGGACTAAAAAAGGCCATGGAGCCAGA  
3237 GGGGCGAGGGCAACAGACCTTTCATGGGCAAACCTTGGGGCCCTGCTG  
3238 TCTAGCATGCCCCACTACGGGTCTAGGCTGCCCATGTAAGGAGGCAAGG  
3239 CCTGGGGACACCCGAGATGCCTGGTTATAATTAACCCAGACATGTGGCTG  
3240 CCCCCCCCCCCCCAACACCTGCTGCCTCTAAAATAACCCTGTCCCTGG  
3241 TGGATCCCCTGCATGCGAAGATCTTCGAACAAGGCTGTGGGGGACTGAG  
3242 GGCAGGCTGTAACAGGCTTGGGGGCCAGGGCTTATACGTGCCTGGGAC  
3243 TCCCAAAGTATTACTGTTCCATGTTCCCGGCGAAGGGCCAGCTGTCCCCC  
3244 GCCAGCTAGACTCAGCACTTAGTTTAGGAACCAGTGAGCAAGTCAGCCC  
3245 TTGGGGCAGCCATAACAAGGCCATGGGGCTGGGGCAAGCTGCACGCCTG  
3246 GGTCCGGGGTGGGCACGGTGCCCGGGCAACGAGCTGAAAGCTCATCTG  
3247 CTCTCAGGGGCCCTCCCTGGGGACAGCCCCTCCTGGCTAGTCACACC  
3248 CTGTAGGCTCCTCTATATAACCCAGGGGCACAGGGGCTGCCCTCATTCTA  
3249 CCACCACCTCCACAGCACAGACAGACTCAGGAGCCAGCCAGACCGG  
3250 TgccaccATGaagcggactgctgatggcagtgatttgagtcccaaagaagaagagaaaaggtgCT  
3251 GAGCATGTACTGCCTGAAGGACAGCAGATTCACCAAGGCCTGGGATAAG  
3252 CGGGTGCTGCTGTTTCAGAGACATCCTGGCCCAGCTGGGAAGAATCCCC  
3253 GCCGAGGCCTACGAGTACTACCACGGCGAGCAGGGTGATAAGAAGAGA  
3254 GCTAACGACAATGAGGGCACAAATCCCAAGCGGCACAAGGACAAGTTCA  
3255 TCGAATTTGCACTGCACTACCTGGAAGCCCAGCACAGCGAGATCTGCTT  
3256 CGGCAGACGCCACATCGTGCGGGAAGAGGCCGGCGCCGGCGATGAGC  
3257 ACAAGAAGCACCGGACCAAGGGAAAGGTGGTGGTGGACTTCAGCAAGA  
3258 AGGACGAGGACCAGAGCTACTATATCTCCAAGAACAACGTGATCGTGCG  
3259 GATCGACAAGAACGCCGGCCCTAGAAGCTACCGGATGGGCCTGAACGA  
3260 GCTGAAGTACCTCGTGCTGCTGAGCCTGCAGGGGAAGGGCGACGATGC  
3261 CATCGCCAAGCTGTACAGATAACAGACAGCACGTGGAGAACATCCTGGAT  
3262 GTGGTGAAGGTGACCGATAAGGATAACCACGTGTTCTGCCCCGCTTCG  
3263 TGCTGGAGCAGCACGGCATCGGCAGAAAGGCCTTCAAGCAGCGGATCG  
3264 ATGGACGGGTGAAGCACGTGCGGGGCGTGTGGGAGAAGAAGAAGGCC  
3265 GCCACCAATGAAATGACCCTGCACGAGAAGGCCAGAGACATCCTGCAGT  
3266 ACGTGAACGAAAATGCACCCGGTCTTCAACCCTGGCGAATACAACAG  
3267 ACTGCTGGTGTGCCTGGTGGGCAAGGACGTGGAGAACTTTCAGGCCGG  
3268 CCTGAAGCGGCTGCAGCTGGCCGAAAGGATCGATGGCCGGGTGTACTC  
3269 CATCTTCGCCCAGACCAGCACCATCAATGAGATGCACCAGGTGGTGTGC

3270 GACCAGATCCTGAACCGGCTGTGCAGAATCGGCGACCAGAAGCTGTACG  
3271 ATTACGTGGGACTGGGCAAGAAGGACGAAATCGACTACAAGCAGAAGGT  
3272 GGCCTGGTTCAAGGAGCACATCAGCATCCGGAGAGGATTCCTGAGAAAG  
3273 AAGTTCTGGTACGATAGCAAGAAGGGATTTCGCAAAGCTGGTGGAGGAAC  
3274 ACCTGGAGTCCGGCGGGCGGCCAGCGCGACGTGGGCCTGGACAAGAAG  
3275 TACTACCACATCGACGCCATCGGCAGATTTCGAGGGCGCCAACCCCGCCC  
3276 TGTACGAGACCCTGGCCAGAGATCGGCTGTGCCTCATGATGGCCCAGTA  
3277 CTTCTGGGCAGCGTGAGAAAGGAAGTGGGCAACAAGATTGTGTGGAGC  
3278 AACGACAGCATCGAACTGCCTaagcgcaccgccgatggttccgagttcgaaagccccaaaa  
3279 aaaagcgcaaggtcGGTGGAGGCGGAGGTTCTGGGGGAGGAGGTAGTGGCG  
3280 GTGGTGGTTTCAGGAGGCGGCGGAAGCcagctgcatttaccgcaggttttagctgacgctg  
3281 tctcacgcctggtcctgggtaagtttggtgacctgaccgacaacttctcctcccctcacgctcgagaaaagt  
3282 gctggctggagtcgcatgacaacaggcacagatgttaaagatgccaaaggtataagtgtttctacaggaA  
3283 Ccaaagtattaatggtgaatacatgagtatcgtggccttgattaaatgactgccatgcagaaataatatct  
3284 cggagatccttgctcagatttcttatacacaacttgagcttacttaataacaagatgatcaaaaaagatc  
3285 catctttcagaaatcagagcggaggggggttaggctgaaggagaatgtccagtttcatctgtacatcagcac  
3286 ctctcctgtggagatgccagaatcttctcaccacatgagccaatcctggaagaaccagcagatagacacc  
3287 caaatcgtaaagcaagaggacagctacggaccaaataagatctggtcaggggacgattccagtgcgct  
3288 ccaatgcgagcatccaaacgtgggacgggggtgctgcaaggggagcggctgctcaccatgtcctgcagtg  
3289 acaagattgcacgctggaacgtggtgggcatccagggatcactgctcagcatttctgaggagcccatttactt  
3290 ctgagcatcatcctgggcagcctttaccacggggaccaccttccagggccatgtaccagcggatctcca  
3291 acatagaggacctgccacctctacaccctcaacaagccttctgctcagtggtatcagcaatgcagaagca  
3292 cggcagccaggggaaggcccccaacttcagtgtaactggacggtagggcactccgctattgaggtcatca  
3293 acgccacgactgggaaggatgagctgggcccgcgctcccgcctgtgtaagcACGCGTTGTACTG  
3294 TCGCTGGATGCGTGTGCACGGCAAGGTTCCCTCCCACTTACTACGCTCC  
3295 AAGATTACCAAGCCCAACGTGTACCATGAGTCCAAGCTGGCGGCAAAGG  
3296 AGTACCAGGCCGCCAAGGCGCGTCTGTTACAGCCTTCATCAAGGCGG  
3297 GGCTGGGGGCCTGGGTGGAGAAGCCCACCGAGCAGGACCAGTTCTCAC  
3298 TCACGGGATCCtaccatacgatgttccagattacgcttatccctacgacgtgctgattatgcatacc  
3299 catatgatgtccccgactatgccGCGGCCGCTGATTACAAAGACGATGACGATAAGtA  
3300 AATCGAATTCCGCTCGAGATAATCAACCTCTGGATTACAAAATTTGTGAAA  
3301 GATTGACTGGTATTCTTAACTATGTTGCTCCTTTTACGCTATGTGGATACGC  
3302 TGCTTTAATGCCTTTGTATCATGCTATTGCTTCCCGTATGGCTTTTCATTTTC  
3303 TCCTCCTTGATAAATCCTGGTTAGTTCTTGCCACGGCGGAACTCATCGC  
3304 CGCCTGCCTTGCCCGCTGCTGGACAGGGGCTCGGCTGTTGGGCACTGA  
3305 CAATCCGTGGTGTGTTATTTGTGAAATTTGTGATGCTATTGCTTTATTTGTA  
3306 ACCATCTAGCTTTATTTGTGAAATTTGTGATGCTATTGCTTTATTTGTAACCA  
3307 TTATAAGCTGCAATAAACAAGTTAACAACAACAATTGCATTCATTTTATGTTT  
3308 CAGGTTTCAGGGGGAGATGTGGGAGGTTTTTTAAAGCGGCCGCCGGCCG  
3309 AGGGCCGCAGGAACCCCTAGTGATGGAGTTGGCCACTCCCTCTCTGCG  
3310 CGCTCGCTCGCTCACTGAGGCCGGGCGACCAAAGGTCGCCCGACGCC  
3311 GGGCTTTGCCCGGGCGGCCTCAGTGAGCGAGCGAGCGCGCAGCTGCC  
3312 TGCAGGGGCGCCTGATGCGGTATTTCTCCTTACGCATCTGTGCGGTATT  
3313 TCACACCGCATACTCAAAGCAACCATAGTACGCGCCCTGTAGCGGCGC

3314 ATTAAGCGCGGGCGGGTGTGGTGGTTACGCGCAGCGTGACCGCTACACTT  
3315 GCCAGCGCCTTAGCGCCCGCTCCTTTTCGCTTTCTTCCCTTCCTTTCTCGC  
3316 CACGTTTCGCCGGCTTTCCCGGTCAAGCTCTAAATCGGGGGCTCCCTTTA  
3317 GGGTTCGATTTAGTGCTTTACGGCACCTCGACCCCAAAAACTTGATTT  
3318 GGGTGATGGTTCACGTAGTGGGCCATCGCCCTGATAGACGGTTTTTTCGC  
3319 CCTTTGACGTTGGAGTCCACGTTCTTTAATAGTGGACTCTTGTTCCAACT  
3320 GGAACAACACTCAACTCTATCTCGGGCTATTCTTTTGATTTATAAGGGATTT  
3321 TGCCGATTTTCGGTCTATTGGTTAAAAAATGAGCTGATTTAACAAAAATTTAA  
3322 CGCGAATTTTAAACAAAATATTAACGTTTACAATTTTATGGTGCACCTCTCAGT  
3323 ACAATCTGCTCTGATGCCGCATAGTTAAGCCAGCCCCGACACCCGCCAA  
3324 CACCCGCTGACGCGCCCTGACGGGCTTGTCTGCTCCCGGCATCCGCTTA  
3325 CAGACAAGCTGTGACCGTCTccgggagctgcatgtgcagaggtttcaccgcatcaccgaa  
3326 acgcgcgagACGAAAGGGCCTCGTGATACGCCTATTTTTATAGGTTAATGTCA  
3327 TGATAATAATGGTTTCTTAGACGTCAGGTGGCACTTTTCGGGGAAATGTGC  
3328 GCGGAACCCCTATTTGTTTATTTTTCTAAATACATTCAAATATGTATCCGCTC  
3329 ATGAGACAATAACCCTGATAAATGCTTCAATAATATTGAAAAAGGAAGAGTA  
3330 TGAGTATTCAACATTTCCGTGTGCGCCCTTATTCCCTTTTTTTCGCGCATT  
3331 GCCTTCCTGTTTTGCTCACCCAGAAACGCTGGTGAAAGTAAAAGATGCT  
3332 GAAGATCAGTTGGGTGCACGAGTGGGTTACATCGAACTGGATCTCAACA  
3333 GCGGTAAGATCCTTGAGAGTTTTCGCCCCGAAGAACGTTTTCCAATGATG  
3334 AGCACTTTTAAAGTTCTGCTATGTGGCGCGGTATTATCCCGTATTGACGCC  
3335 GGGCAAGAGCAACTCGGTGCGCCGCATACACTATTCTCAGAATGACTTGGT  
3336 TGAGTACTCACCAGTCACAGAAAAGCATCTTACGGATGGCATGACAGTAA  
3337 GAGAATTATGCAGTGCTGCCATAACCATGAGTGATAACACTGCGGCCAAC  
3338 TTAATTCTGACAACGATCGGAGGACCGAAGGAGCTAACCGCTTTTTTTCGA  
3339 CAACATGGGGGATCATGTAACCTCGCCTTGATCGTTGGGAACCGGAGCTG  
3340 AATGAAGCCATACCAAACGACGAGCGTGACACCACGATGCCTGTAGCAAT  
3341 GGCAACAACGTTGCGCAAACCTATTAACCTGGCGAACTACTTACTCTAGCTT  
3342 CCCGGCAACAATTAATAGACTGGATGGAGGCGGATAAAGTTGCAGGACCA  
3343 CTTCTGCGCTCGGCCCTTCCGGCTGGCTGGTTTATTGCTGATAAATCTGG  
3344 AGCCGGTGAGCGTGGAAGCCGCGGTATCATTGCAGCACTGGGGCCAGA  
3345 TGGTAAGCCCTCCCGTATCGTAGTTATCTACACGACGGGGAGTCAGGCAA  
3346 CTATGGATGAACGAAATAGACAGATCGCTGAGATAGGTGCCTCACTGATTA  
3347 AGCATTGGTAACTGTCAGACCAAGTTTACTCATATATACTTTAGATTGATTTA  
3348 AACTTTCATTTTAAATTTAAAAGGATCTAGGTGAAGATCCTTTTTGATAATCT  
3349 CATGACCAAATCCCTTAAACGTGAGTTTTTCGTTCCACTGAGCGTCAGACC  
3350 CCGTAGAAAAGATCAAAGGATCTTCTTGAGATCCTTTTTTTCTGCGCGTAA  
3351 TCTGCTGCTTGCAAACAAAAAACCACCGCTACCAGCGGTGGTTTGTGTTG  
3352 CCGGATCAAGAGCTACCAACTCTTTTTCCGAAGGTAACCTGGCTTCAGCAG  
3353 AGCGCAGATACCAAATACTGTTCTTCTAGTGTAGCCGTAGTTAGGCCACC  
3354 ACTTCAAGAACTCTGTAGCACCGCCTACATACCTCGCTCTGCTAATCCTGT  
3355 TACCAGTGGCTGCTGCCAGTGGCGATAAGTCGTGTCTTACCGGGTTGGA  
3356 CTCAAGACGATAGTTACCGGATAAGGCGCAGCGGTCGGGCTGAACGGG  
3357 GGGTTCGTGCACACAGCCCAGCTTGGAGCGAACGACCTACACCGAACT

3358 GAGATACCTACAGCGTGAGCTATGAGAAAGCGCCACGCTTCCCGAAGGG  
3359 AGAAAGGCGGACAGGTATCCGGTAAGCGGCAGGGTCGGAACAGGAGAG  
3360 CGCACGAGGGAGCTTCCAGGGGGAAACGCCTGGTATCTTTATAGTCCTG  
3361 TCGGGTTTCGCCACCTCTGACTTGAGCGTCGATTTTTGTGATGCTCGTCA  
3362 GGGGGGCGGAGCCTATGGAAAACGCCAGCAACGCGGCCTTTTTACGG  
3363 TTCCTGGCCTTTTGCTGGCCTTTTGCTCACATGT

3364

3365 >M2

3366 CCTGCAGGCAGCTGCGCGCTCGCTCGCTCACTGAGGCCGCCCGGGCG  
3367 TCGGGCGACCTTTGGTCGCCCCGGCCTCAGTGAGCGAGCGAGCGCGCA  
3368 GAGAGGGAGTGGCCAACTCCATCACTAGGGGTTCTGCGGCCTCTAGAg  
3369 gagggcctattcccatgattcctcatattgcatatacgatacaaggctgtagagagataattggaattaatt  
3370 tgactgtaaacacaaagatattagtaaaaaaacgtgacgtagaaagtaataatttctgggtagttgcagttt  
3371 taaaattatgttttaaagtgactatcatatgcttaccgtaactgaaagtatttcgatttctggctttatatatcttG  
3372 TGGAAGGACGAAACACCGGCTGGAGCAGCCCCGATTTGTGGGGTGA  
3373 TTACAGCGTCTGCAATATAAGCTGCCAACCCTTGTCAATGAATGTGAGG  
3374 GACTCCTGCTGGAGCAGCCCCGATTTGTGGGGTGATTACAGCTTTTTTTT  
3375 ACCCTTCAGATTAATAACTGAGGTAAGGGCCTGGGTAGGGGAGGTG  
3376 GTGTGAGACGCTCCTGTCTCTCCTCTATCTGCCCATCGGCCCTTTGGGG  
3377 AGGAGGAATGTGCCCAAGGACTAAAAAAGGCCATGGAGCCAGAGGGG  
3378 CGAGGGCAACAGACCTTTCATGGGCAAACCTTGGGGCCCTGCTGTCTAG  
3379 CATGCCCCACTACGGGTCTAGGCTGCCCATGTAAGGAGGCAAGGCCTGG  
3380 GGACACCCGAGATGCCTGGTTATAATTAACCCAGACATGTGGCTGCCCCC  
3381 CCCCCCAACACCTGCTGCCTCTAAAATAACCTGTCCCTGGTGGATC  
3382 CCCTGCATGCGAAGATCTTCGAACAAGGCTGTGGGGGACTGAGGGCAG  
3383 GCTGTAACAGGCTTGGGGGCCAGGGCTTATACGTGCCTGGGACTCCCAA  
3384 AGTATTACTGTTCCATGTTCCCGGCGAAGGGCCAGCTGTCCCCCGCCAG  
3385 CTAGACTCAGCACTTAGTTTAGGAACCAGTGAGCAAGTCAGCCCTTGGG  
3386 GCAGCCCATAAAGGCCATGGGGCTGGGCAAGCTGCACGCCTGGGTCC  
3387 GGGGTGGGCACGGTGCCCGGGCAACGAGCTGAAAGCTCATCTGCTCTC  
3388 AGGGGCCCTCCCTGGGGACAGCCCCTCCTGGCTAGTCACACCCTGTA  
3389 GGCTCCTCTATATAACCCAGGGGCACAGGGGCTGCCCTCATTCTACCACC  
3390 ACCTCCACAGCACAGACAGACACTCAGGAGCCAGCCAGaccggtGCCACC  
3391 ATGGCCCCCAAGAAGAAGaGGAAGGTGCTGAGCATGTAAGTGCCTGAAGG  
3392 ACAGCAGATTCACCAAGGCCTGGGATAAGCGGGTGCTGCTGTTTCAGAGA  
3393 CATCCTGGCCCAGCTGGGAAGAATCCCCGCCGAGGCCTACGAGTACTAC  
3394 CACGGCGAGCAGGGTGATAAGAAGAGAGCTAACGACAATGAGGGCACAA  
3395 ATCCCAAGCGGCACAAGGACAAGTTCATCGAATTTGCACTGCACTACCTG  
3396 GAAGCCCAGCACAGCGAGATCTGCTTCGGCAGACGCCACATCGTGCGG  
3397 GAAGAGGCCCGGCCGCGCGGCGATGAGCACAGAAGCACCCGGACCAAGGG  
3398 AAAGGTGGTGGTGGACTTCAGCAAGAAGGACGAGGACCAGAGCTACTAT  
3399 ATCTCCAAGAACAACGTGATCGTGCGGATCGACAAGAACGCCGGCCCTA  
3400 GAAGCTACCGGATGGGCCTGAACGAGCTGAAGTACCTCGTGCTGCTGAG  
3401 CCTGCAGGGGAAGGGCGACGATGCCATCGCCAAGCTGTACAGATACAGA

3402 CAGCACGTGGAGAACATCCTGGATGTGGTGAAGGTGACCGATAAGGATA  
3403 ACCACGTGTTCCCTGCCCGCTTCGTGCTGGAGCAGCACGGCATCGGCA  
3404 GAAAGGCCCTCAAGCAGCGGATCGATGGACGGGTGAAGCACGTGCGGG  
3405 GCGTGTGGGAGAAGAAGAAGGCCGCCACCAATGAAATGACCCTGCACG  
3406 AGAAGGCCAGAGACATCCTGCAGTACGTGAACGAAAACCTGCACCCGGTC  
3407 CTTCAACCCTGGCGAATAACAACAGACTGCTGGTGTGCCTGGTGGGCAAG  
3408 GACGTGGAGAACTTTTCAGGCCGGCCTGAAGCGGCTGCAGCTGGCCGAA  
3409 AGGATCGATGGCCGGGTGTACTCCATCTTCGCCCAGACCAGCACCATCA  
3410 ATGAGATGCACCAGGTGGTGTGCGACCAGATCCTGAACCGGCTGTGCAG  
3411 AATCGGCGACCAGAAGCTGTACGATTACGTGGGACTGGGCAAGAAGGAC  
3412 GAAATCGACTACAAGCAGAAGGTGGCCTGGTTCAAGGAGCACATCAGCA  
3413 TCCGGAGAGGATTCTGAGAAAGAAGTTCTGGTACGATAGCAAGAAGGG  
3414 ATTCGCAAAGCTGGTGGAGGAACACCTGGAGTCCGGCGGCGGCCAGCG  
3415 CGACGTGGGCCTGGACAAGAAGTACTACCACATCGACGCCATCGGCAGA  
3416 TTCGAGGGCGCCAACCCCGCCCTGTACGAGACCCTGGCCAGAGATCGG  
3417 CTGTGCCTCATGATGGCCCAGTACTTCTGGGCAGCGTGAGAAAGGAAC  
3418 TGGGCAACAAGATTGTGTGGAGCAACGACAGCATCGAACTGCCTCCCAA  
3419 GAAGAAGCGGAAGGTGGGTGGAGGCGGAGGTTCTGGGGGAGGAGGTA  
3420 GTGGCGGTGGTGGTTCAGGAGGCGGCGGAAGCcagctgcattaccgcaggttta  
3421 gctgacgctgtctcacgcctggtctgggtaagtttggtgacctgaccgacaacttctcctcccctcacgctcg  
3422 cagaaaagtgtgctggagtcgtcatgacaacaggcacagatgttaagatgccaaagtgataagtgttt  
3423 ctacaggaACcaaatgtattaatggtgaatacatgagtgatcgtggccttgattaaatgactgccatgcag  
3424 aaataatatctcgagatccttgctcagatttcttatacacaactgagcttacttaataacaagatgatca  
3425 aaaaagatccatcttcagaaatcagagcgaggggggttaggctgaaggagaatgtccagtttcatctgta  
3426 catcagcacctctccctgtggagatgccagaatcttctcaccacatgagccaatcctggaagaaccagcag  
3427 atagacacccaaatcgtaaagcaagaggacagctacggaccaaaatagagtctggctcaggggacgatt  
3428 ccagtgcgctccaatgcgagcatccaaacgtgggacgggggtgctgcaaggggagcggtgctcacatg  
3429 tcctgcagtgacaagattgcacgctggaacgtggtgggcatccagggatcactgctcagcatttctgaggag  
3430 cccatttacttctcgagcatcatcctgggcagcctttaccacggggaccaccttccagggccatgtaccagc  
3431 ggatctccaacatagaggacctgccacctctctacaccctcaacaagccttggctcagtggtcagcaatg  
3432 cagaagcacggcagccaggggaagggcccaactcagtgcaactggacggtagggcactccgctattg  
3433 aggtcatcaacgccacgactgggaaggtgagctgggcccgcgctcccgcctgtgtaagcACGCGT  
3434 TGTA CTGTCGCTGGATGCGTGTGCACGGCAAGGTTCCCTCCC ACTTACTA  
3435 CGCTCCAAGATTACCAAGCCCAACGTGTACCATGAGTCCAAGCTGGCGG  
3436 CAAAGGAGTACCAGGCCGCCAAGGCGCGTCTGTTACAGCCTTCATCAA  
3437 GGCGGGGCTGGGGGCCTGGGTGGAGAAGCCCACCGAGCAGGACCAGT  
3438 TCTCACTCACGAAAAGGCCGGCGGCCACGAAAAGGCCGGCCAGGCAA  
3439 AAAAGAAAAGtaccatac gatgttccagattacgcttatccctacgacgtgcctgattatgcataccc  
3440 atatgatgtccccgactatgccGCGCCGCTGATTACAAAGACGATGACGATAAGtaa  
3441 ATCGAATTCGCTCGAGATAATCAACCTCTGGATTACAAAATTTGTGAAAG  
3442 ATTGACTGGTATTCTTA ACTATGTTGCTCCTTTTACGCTATGTGGATACGCT  
3443 GCTTTAATGCCTTTGTATCATGCTATTGCTTCCCGTATGGCTTTTCATTTTCT  
3444 CCTCCTTGATAAATCCTGGTTAGTTCTTGCCACGGCGGAACTCATCGCC  
3445 GCCTGCCTTGCCCGCTGCTGGACAGGGGCTCGGCTGTTGGGCACTGAC



3446 AATCCGTGGTGTTTATTTGTGAAATTTGTGATGCTATTGCTTTATTTGTAA  
3447 CCATCTAGCTTTATTTGTGAAATTTGTGATGCTATTGCTTTATTTGTAACCAT  
3448 TATAAGCTGCAATAAACAAGTTAACAACAACAATTGCATTCATTTTATGTTTC  
3449 AGGTTTCAGGGGGAGATGTGGGAGGTTTTTTAAAGCGGCCGCCggccgagG  
3450 GCCGCAGGAACCCCTAGTGATGGAGTTGGCCACTCCCTCTCTGCGCGCT  
3451 CGCTCGCTCACTGAGGCCGGGCGACCAAAGGTCGCCCGACGCCCGGG  
3452 CTTTGCCCGGGCGGCCTCAGTGAGCGAGCGAGCGCGCAGCTGCCTGCA  
3453 GGGGCGCCTGATGCGGTATTTTCTCCTTACGCATCTGTGCGGTATTTTAC  
3454 ACCGCATACGTCAAAGCAACCATAGTACGCGCCCTGTAGCGGCGCATTAA  
3455 GCGCGGGCGGGTGTGGTGGTTACGCGCAGCGTGACCGCTACACTTGCCA  
3456 GCGCCTTAGCGCCCGCTCCTTTTCGCTTTTCTTCCCTTCCCTTTCTCGCCACG  
3457 TTCGCCGGCTTTCCCCGTCAAGCTCTAAATCGGGGGCTCCCTTTAGGGT  
3458 TCCGATTTAGTGCTTTACGGCACCTCGACCCCAAAAACTTGATTTGGGT  
3459 GATGGTTCACGTAGTGGGCCATCGCCCTGATAGACGGTTTTTTCGCCCTTT  
3460 GACGTTGGAGTCCACGTTCTTTAATAGTGGACTCTTGTTCCAAACTGGAA  
3461 CAACACTCAACTCTATCTCGGGCTATTCTTTTGATTTATAAGGGATTTTGCC  
3462 GATTTTCGGTCTATTGGTTAAAAAATGAGCTGATTTAACAAAAATTTAACGCG  
3463 AATTTTAAACAAAATATTAACGTTTACAATTTTATGGTGCCTCTCAGTACAAT  
3464 CTGCTCTGATGCCGCATAGTTAAGCCAGCCCCGACACCCGCCAACACCC  
3465 GCTGACGCGCCCTGACGGGCTTGTCTGCTCCCGGCATCCGCTTACAGAC  
3466 AAGCTGTGACCGTCTccgggagctgcatgtgtcagaggtttcaccgtcatcaccgaaacgcgag  
3467 agACGAAAGGGCCTCGTGATACGCCTATTTTTATAGGTTAATGTCATGATAA  
3468 TAATGGTTTCTTAGACGTCAGGTGGCACTTTTCGGGGAAATGTGCGCGGA  
3469 ACCCCTATTTGTTTATTTTTCTAAATACATTCAAATATGTATCCGCTCATGAG  
3470 ACAATAACCCTGATAAATGCTTCAATAATATTGAAAAAGGAAGAGTATGAGT  
3471 ATTCAACATTTCCGTGTCGCCCTTATTCCCTTTTTTTCGGGCATTTTGCCTT  
3472 CCTGTTTTTTCGTCACCCAGAAACGCTGGTGAAAGTAAAAGATGCTGAAGA  
3473 TCAGTTGGGTGCACGAGTGGGTTACATCGAACTGGATCTCAACAGCGGT  
3474 AAGATCCTTGAGAGTTTTTCGCCCGAAGAACGTTTTTCCAATGATGAGCAC  
3475 TTTTAAAGTTCTGCTATGTGGCGCGGTATTATCCCGTATTGACGCCGGGCA  
3476 AGAGCAACTCGGTCGCCGCATACACTATTCTCAGAATGACTTGGTTGAGT  
3477 ACTCACCAGTCACAGAAAAGCATCTTACGGATGGCATGACAGTAAGAGAA  
3478 TTATGCAGTGCTGCCATAACCATGAGTGATAAACTGCGGCCAACTTACTT  
3479 CTGACAACGATCGGAGGACCGAAGGAGCTAACCGCTTTTTTGCACAACA  
3480 TGGGGGATCATGTAACCTCGCCTTGATCGTTGGGAACCGGAGCTGAATGA  
3481 AGCCATACCAAACGACGAGCGTGACACCACGATGCCTGTAGCAATGGCA  
3482 ACAACGTTGCGCAAACCTATTAACCTGGCGAACTACTTACTCTAGCTTCCCG  
3483 GCAACAATTAATAGACTGGATGGAGGCGGATAAAGTTGCAGGACCACTTC  
3484 TCGCTCGGCCCTTCCGGCTGGCTGGTTTATTGCTGATAAATCTGGAGCC  
3485 GGTGAGCGTGGAAGCCGCGGTATCATTGCAGCACTGGGGCCAGATGGTA  
3486 AGCCCTCCCGTATCGTAGTTATCTACACGACGGGGAGTCAGGCAACTATG  
3487 GATGAACGAAATAGACAGATCGCTGAGATAGGTGCCTCACTGATTAAGCA  
3488 TTGGTAACTGTCAGACCAAGTTTACTCATATATACTTTAGATTGATTTAAAC  
3489 TTCATTTTTAATTTAAAAGGATCTAGGTGAAGATCCTTTTTGATAATCTCATG

3490 ACCAAAATCCCTTAACGTGAGTTTTTCGTTCCACTGAGCGTCAGACCCCGT  
3491 AGAAAAGATCAAAGGATCTTCTTGAGATCCTTTTTTTCTGCGCGTAATCTG  
3492 CTGCTTGCAAACAAAAAACCCGCTACCAGCGGTGGTTTGTGGCCG  
3493 GATCAAGAGCTACCAACTCTTTTTCCGAAGGTAAGTGGCTTCAGCAGAGC  
3494 GCAGATAACCAATACTGTTCTTCTAGTGTAGCCGTAGTTAGGCCACCACTT  
3495 CAAGAACTCTGTAGCACCGCCTACATACCTCGCTCTGCTAATCCTGTTACC  
3496 AGTGGCTGCTGCCAGTGGCGATAAGTCGTGTCTTACCGGGTTGGACTCA  
3497 AGACGATAGTTACCGGATAAGGCGCAGCGGTGCGGGCTGAACGGGGGGT  
3498 TCGTGCACACAGCCCAGCTTGGAGCGAACGACCTACACCGAACTGAGAT  
3499 ACCTACAGCGTGAGCTATGAGAAAGCGCCACGCTTCCCGAAGGGAGAAA  
3500 GGCGGACAGGTATCCGGTAAGCGGCAGGGTCGGAACAGGAGAGCGCAC  
3501 GAGGGAGCTTCCAGGGGGAAACGCCTGGTATCTTTATAGTCCTGTGGGG  
3502 TTTCGCCACCTCTGACTTGAGCGTCGATTTTTGTGATGCTCGTCAGGGGG  
3503 GCGGAGCCTATGGAAAACGCCAGCAACGCGGCCTTTTTACGGTTCCTG  
3504 GCCTTTTGCTGGCCTTTTGCTCACATGT

3505

3506 >M3

3507 CCTGCAGGCAGCTGCGCGCTCGCTCGCTCACTGAGGCCGCCCGGGCG  
3508 TCGGGCGACCTTTGGTCGCCCGGCCTCAGTGAGCGAGCGAGCGCGCA  
3509 GAGAGGGAGTGGCCAACCTCATCACTAGGGGTTCCTGCGGCCTCTAGAg  
3510 gagggcctatttcccatgattccttcatatttgcataacgatacaaggctgtagagagataaattggaattaatt  
3511 tgactgtaaacacaaagatattagtacaaaatacgtgacgtagaaagtaataatttcttgggtagttgcagttt  
3512 taaaattatgttttaaatggactatcatatgcttaccgtaactgaaagtatttcgatttcttggcttatatatcttG  
3513 TGGAAAGGACGAAACACCGGTCTGCAATATAAGCTGCCAACCCTTGTCA  
3514 ATGAATGTGAGGGACTCCTGCTGGAGCAGCCCCGATTTGTGGGGTGAT  
3515 TACAGCTTTTTTTACCCCTTCAGATTAATAAAGTGGTAAGGGCCTGGG  
3516 TAGGGGAGGTGGTGTGAGACGCTCCTGTCTCTCCTCTATCTGCCCATCG  
3517 GCCCTTTGGGGAGGAGGAATGTGCCCAAGGACTAAAAAAGGCCATGGA  
3518 GCCAGAGGGGCGAGGGCAACAGACCTTTCATGGGCAAACCTTGGGGCC  
3519 CTGCTGTCTAGCATGCCCCACTACGGGTCTAGGCTGCCCATGTAAGGAG  
3520 GCAAGGCCTGGGGACACCCGAGATGCCTGGTTATAATTAACCCAGACATG  
3521 TGGCTGCCCCCCCCCCCCAACACCTGCTGCCTCTAAAAATAACCCTGT  
3522 CCCTGGTGGATCCCCTGCATGCGAAGATCTTCGAACAAGGCTGTGGGGG  
3523 ACTGAGGGCAGGCTGTAACAGGCTTGGGGGCCAGGGCTTATACGTGCCT  
3524 GGGACTCCCAAAGTATTACTGTTCCATGTTCCCGGCGAAGGGCCAGCTG  
3525 TCCCCCGCCAGCTAGACTCAGCACTTAGTTTAGGAACCAAGTGGAGCAAGT  
3526 CAGCCCTTGGGGCAGCCCATACAAGGCCATGGGGCTGGGCAAGCTGCA  
3527 CGCCTGGGTCCGGGGTGGGCACGGTGCCCGGGCAACGAGCTGAAAGC  
3528 TCATCTGCTCTCAGGGGCCCCTCCCTGGGGACAGCCCCTCCTGGCTAGT  
3529 CACACCCTGTAGGCTCCTCTATATAACCCAGGGGGCACAGGGGGCTGCCCT  
3530 CATTCTACCACCACCTCCACAGCACAGACAGACACTCAGGAGCCAGCCA  
3531 GaccggtGCCACCATGGCCCCAAGAAGAAGaGGAAGGTGCTGAGCATGT  
3532 ACTGCCTGAAGGACAGCAGATTCACCAAGGCCTGGGATAAGCGGGTGCT  
3533 GCTGTTTCAGAGACATCCTGGCCCAGCTGGGAAGAATCCCCGCCGAGGC

3534 CTACGAGTACTACCACGGCGAGCAGGGTGATAAGAAGAGAGCTAACGAC  
3535 AATGAGGGCACAAATCCCAAGCGGCACAAGGACAAGTTCATCGAATTTGC  
3536 ACTGCACTACCTGGAAGCCCAGCACAGCGAGATCTGCTTCGGCAGACGC  
3537 CACATCGTGCGGGAAGAGGGCCGGCGCCGGCGATGAGCACAAGAAGCAC  
3538 CGGACCAAGGGAAAGGTGGTGGTGGACTTCAGCAAGAAGGACGAGGAC  
3539 CAGAGCTACTATATCTCCAAGAACAACGTGATCGTGCGGATCGACAAGAA  
3540 CGCCGGCCCTAGAAGCTACCGGATGGGCCTGAACGAGCTGAAGTACCTC  
3541 GTGCTGCTGAGCCTGCAGGGGAAGGGCGACGATGCCATCGCCAAGCTG  
3542 TACAGATACAGACAGCACGTGGAGAACATCCTGGATGTGGTGAAGGTGA  
3543 CCGATAAGGATAACCACGTGTTCCCTGCCCCGCTTCGTGCTGGAGCAGCA  
3544 CGGCATCGGCAGAAAGGCCCTTCAAGCAGCGGATCGATGGACGGGTGAA  
3545 GCACGTGCGGGGCGTGTGGGAGAAGAAGAAGGCCGCCACCAATGAAAT  
3546 GACCCTGCACGAGAAGGCCAGAGACATCCTGCAGTACGTGAACGAAAAC  
3547 TGCACCCGGTCCCTTCAACCCTGGCGAATAACAACAGACTGCTGGTGTGCC  
3548 TGGTGGGCAAGGACGTGGAGAACTTTTCAGGCCGGCCTGAAGCGGCTGC  
3549 AGCTGGCCGAAAGGATCGATGGCCGGGTGTACTCCATCTTCGCCCAGAC  
3550 CAGCACCATCAATGAGATGCACCAGGTGGTGTGCGACCAGATCCTGAAC  
3551 CGGCTGTGCAGAATCGGCGACCAGAAGCTGTACGATTACGTGGGACTGG  
3552 GCAAGAAGGACGAAATCGACTACAAGCAGAAGGTGGCCTGGTTCAAGGA  
3553 GCACATCAGCATCCGGAGAGGATTCTGAGAAAGAAGTTCTGGTACGATA  
3554 GCAAGAAGGGATTTCGCAAAGCTGGTGGAGGAACACCTGGAGTCCGGCG  
3555 GCGGCCAGCGCGACGTGGGCCTGGACAAGAAGTACTACCACATCGACG  
3556 CCATCGGCAGATTTCGAGGGCGCCAACCCCGCCCTGTACGAGACCCTGG  
3557 CCAGAGATCGGCTGTGCCTCATGATGGCCCAGTACTTCCTGGGCAGCGT  
3558 GAGAAAGGAACTGGGCAACAAGATTGTGTGGAGCAACGACAGCATCGAA  
3559 CTGCCTCCCAAGAAGAAGCGGAAGGTGGGTGGAGGCGGAGGTTCTGGG  
3560 GGAGGAGGTAGTGGCGGTGGTGGTTCAGGAGGCGGCGGAAGC  
3561 ttaccgcaggttttagctgacgctgtctcacgcctggtcctgggtaagtttggtagcctgaccgacaactctc  
3562 ctccccacgctcgcagaaaagtgtggtgagtcgtcatgacaacaggcacagatgtaaagatgcc  
3563 aaggtgataagtgtttctacaggaACcaaatgtattaatggtgaatacatgagtgatcgtggccttgcat  
3564 atgactgccatgcagaaataatctcggagatcctgtcagatttcttatacacaacttgagctttacttaa  
3565 taacaaagatgatcaaaaaagatccatcttcagaaatcagagcgaggggggttaggctgaaggagaat  
3566 gtccagttcatctgtacatcagcacctctccctgtggagatgccagaatcttctaccacatgagccaatcct  
3567 ggaagaaccagcagatagacacccaaatcgtaaagcaagaggacagctacggacaaaatagagtct  
3568 ggtcaggggacgattccagtgcgctccaatgcgagcatcaaactgggacggggtgctgcaagggga  
3569 gcggctgctcaccatgtcctgcagtgacaagattgcagctggaactggggtgggcatccagggatcactgc  
3570 tcagcatttcgtggagcccatttacttctcgagcatcatcctgggagcctttaccacggggaccaccttcca  
3571 gggccatgtaccagcggatctccaacatagaggacctgccacctctctacacctcaacaagccttggctc  
3572 agtggcatcagcaatgcagaagcacggcagccaggggaaggccccaacttcagtgtcaactggacggt  
3573 aggcgactccgctattgaggtcatcaacgccacgactgggaaggatgagctgggcccgcgctcccgcct  
3574 gtgtaagcACGCGTTGTAAGTGTGCTGGATGCGTGTGCACGGCAAGGTTCC  
3575 CTCCCACTTACTACGCTCCAAGATTACCAAGCCCAACGTGTACCATGAGT  
3576 CCAAGCTGGCGGCAAAGGAGTACCAGGCCGCAAGGCGCGTCTGTTCA  
3577 CAGCCTTCATCAAGGCGGGGCTGGGGGCCTGGGTGGAGAAGCCCACCG

3578 AGCAGGACCAGTTCTCACTCACGAAAAGGCCGGCGGCCACGAAAAGG  
3579 CCGGCCAGGCAAAAAAGAAAAAGtaccatacgcgttccagattacgcttatccctacgac  
3580 gtgcctgattatgcatacccatatgatgtccccgactatgccGCGGCCGCTGATTACAAAGAC  
3581 GATGACGATAAGtaaATCGAATTCCGCTCGAGATAATCAACCTCTGGATTAC  
3582 AAAATTTGTGAAAGATTGACTGGTATTCTTAACTATGTTGCTCCTTTTACGC  
3583 TATGTGGATACGCTGCTTTAATGCCTTTGTATCATGCTATTGCTTCCCGTAT  
3584 GGCTTTCATTTTCTCCTCCTTGTATAAATCCTGGTTAGTTCTTGCCACGGC  
3585 GGAACATCATCGCCGCCTGCCTTGCCCGCTGCTGGACAGGGGCTCGGCT  
3586 GTTGGGCACTGACAATTCCGTGGTGTGTTATTTGTGAAATTTGTGATGCTAT  
3587 TGCTTTATTTGTAACCATCTAGCTTTATTTGTGAAATTTGTGATGCTATTGCT  
3588 TTATTTGTAACCATTATAAGCTGCAATAAACAAGTTAACAACAACAATTGCA  
3589 TTCATTTTATGTTTCAGGTTTCAGGGGGAGATGTGGGAGGTTTTTTAAAGC  
3590 GGCCGCCggccgagGGCCGCAGGAACCCCTAGTGATGGAGTTGGCCACTC  
3591 CCTCTCTGCGCGCTCGCTCGCTCACTGAGGCCGGGCGACCAAAGGTGC  
3592 CCCGACGCCCGGGCTTTGCCCGGGCGGCCTCAGTGAGCGAGCGAGCG  
3593 CGCAGCTGCCTGCAGGGGGCGCCTGATGCGGTATTTTCTCCTTACGCATC  
3594 TGTGCGGTATTTACACCCGCATACGTCAAAGCAACCATAGTACGCGCCCT  
3595 GTAGCGGCGCATTAAAGCGCGGCGGGTGTGGTGGTTACGCGCAGCGTGA  
3596 CCGCTACACTTGCCAGCGCCTTAGCGCCCGCTCCTTTGCTTTCTTCCCT  
3597 TCCTTTCTCGCCACGTTCCGCCGGCTTTCCCGTCAAGCTCTAAATCGGG  
3598 GGCTCCCTTTAGGGTTCCGATTTAGTGCTTTACGGCACCTCGACCCCAA  
3599 AAACCTTGATTTGGGTGATGGTTCACGTAGTGGGCCATCGCCCTGATAGAC  
3600 GGTTTTTCGCCCTTTGACGTTGGAGTCCACGTTCTTTAATAGTGGACTCTT  
3601 GTTCCAAACTGGAACAACACTCAACTCTATCTCGGGCTATTCTTTTGATTT  
3602 ATAAGGGATTTTGCCGATTTCCGTCTATTGGTTAAAAAATGAGCTGATTTAA  
3603 CAAAAATTTAACGCGAATTTTAAACAAAATATTAACGTTTACAATTTTATGGTG  
3604 CACTCTCAGTACAATCTGCTCTGATGCCGCATAGTTAAGCCAGCCCCGAC  
3605 ACCCGCCAACACCCGCTGACGCGCCCTGACGGGCTTGTCTGCTCCCGG  
3606 CATCCGCTTACAGACAAGCTGTGACCGTCTccgggagctgcatgtgtcagaggtttca  
3607 ccgtcatcaccgaaacgcgcgagACGAAAGGGCCTCGTGATACGCCTATTTTTATAG  
3608 GTTAATGTCATGATAATAATGGTTTCTTAGACGTCAGGTGGCACTTTTCGG  
3609 GGAAATGTGCGCGGAACCCCTATTTGTTTATTTTTCTAAATACATTCAATA  
3610 TGTATCCGCTCATGAGACAATAACCCTGATAAATGCTTCAATAATATTGAAA  
3611 AAGGAAGAGTATGAGTATTCAACATTTCCGTGTGCGCCCTTATTCCCTTTTT  
3612 TGCGGCATTTTGCTTTCCTGTTTTTGTCTACCCAGAAACGCTGGTGAAAG  
3613 TAAAGATGCTGAAGATCAGTTGGGTGCACGAGTGGGTTACATCGAACTG  
3614 GATCTCAACAGCGGTAAGATCCTTGAGAGTTTTTCGCCCGAAGAACGTTT  
3615 TCCAATGATGAGCACTTTTAAAGTTCTGCTATGTGGCGCGGTATTATCCCG  
3616 TATTGACGCCGGCAAGAGCAACTCGGTGCGCCGCATACACTATTCTCAGA  
3617 ATGACTTGGTTGAGTACTCACAGAAAAGCATCTTACGGATGGC  
3618 ATGACAGTAAGAGAATTATGCAGTGCTGCCATAACCATGAGTGATAACACT  
3619 GCGGCCAACTTACTTCTGACAACGATCGGAGGACCGAAGGAGCTAACCG  
3620 CTTTTTGCACAACATGGGGGATCATGTAACCTCGCCTTGATCGTTGGGAA  
3621 CCGGAGCTGAATGAAGCCATACCAAACGACGAGCGTGACACCACGATGC

3622 CTGTAGCAATGGCAACAACGTTGCGCAAACCTATTAACCTGGCGAACTACTTA  
3623 CTCTAGCTTCCCGGCAACAATTAATAGACTGGATGGAGGCGGATAAAGTT  
3624 GCAGGACCACTTCTGCGCTCGGCCCTTCCGGCTGGCTGGTTTATTGCTG  
3625 ATAAATCTGGAGCCGGTGAGCGTGGAAGCCGCGGTATCATTGCAGCACT  
3626 GGGGCCAGATGGTAAGCCCTCCCGTATCGTAGTTATCTACACGACGGGG  
3627 AGTCAGGCAACTATGGATGAACGAAATAGACAGATCGCTGAGATAGGTGC  
3628 CTCACTGATTAAGCATTGGTAACCTGTCAGACCAAGTTTACTCATATATACTT  
3629 TAGATTGATTTAAACTTCATTTTTAATTTAAAGGATCTAGGTGAAGATCCT  
3630 TTTTGATAATCTCATGACCAAATCCCTTAACGTGAGTTTTTCGTTCCACTG  
3631 AGCGTCAGACCCCGTAGAAAAGATCAAAGGATCTTCTTGAGATCCTTTTTT  
3632 TCTGCGCGTAATCTGCTGCTTGCAAACAAAAAACCCACCGCTACCAGCG  
3633 GTGGTTTGTGGCCGGATCAAGAGCTACCAACTCTTTTTCCGAAGGTAAC  
3634 TGGCTTCAGCAGAGCGCAGATACCAAATACTGTTCTTCTAGTGTAGCCGT  
3635 AGTTAGGCCACCACTTCAAGAACTCTGTAGCACCGCCTACATACCTCGCT  
3636 CTGCTAATCCTGTTACCAGTGGCTGCTGCCAGTGGCGATAAGTCGTGTCT  
3637 TACCGGGTTGGACTCAAGACGATAGTTACCGGATAAGGCGCAGCGGTCCG  
3638 GGCTGAACGGGGGGTTCGTGCACACAGCCCAGCTTGGAGCGAACGACC  
3639 TACACCGAACTGAGATACCTACAGCGTGAGCTATGAGAAAGCGCCACGCT  
3640 TCCCGAAGGGAGAAAGGCGGACAGGTATCCGGTAAGCGGCAGGGTCGG  
3641 AACAGGAGAGCGCACGAGGGAGCTTCCAGGGGGAAACGCCTGGTATCT  
3642 TTATAGTCCTGTCGGGTTTCGCCACCTCTGACTTGAGCGTCGATTTTTGT  
3643 GATGCTCGTCAGGGGGGCGGAGCCTATGGAAAAACGCCAGCAACGCGG  
3644 CCTTTTTACGGTTCCTGGCCTTTTGCTGGCCTTTTGCTCACATGT  
3645  
3646  
3647
